# Supplementary material for: Risk of ischaemic stroke in patients with migraine: a longitudinal follow-up study using a national sample cohort in South Korea
Source: PubMed Central journal article supplement — BMJ Open. 2019 Apr 2;9(4):e027701. doi: 10.1136/bmjopen-2018-027701 (PMC6500292; doi:10.1136/bmjopen-2018-027701), 2019-04-02
Supplement: bmjopen-2018-027701.draft_revisions.pdf [file bmjopen-2018-027701.draft_revisions.pdf]

# BMJ Open

BMJ Open is committed to open peer review. As part of this commitment we make the peer review history of every article we publish publicly available.

When an article is published we post the peer reviewers' comments and the authors' responses online. We also post the versions of the paper that were used during peer review. These are the versions that the peer review comments apply to.

The versions of the paper that follow are the versions that were submitted during the peer review process. They are not the versions of record or the final published versions. They should not be cited or distributed as the published version of this manuscript.

BMJ Open is an open access journal and the full, final, typeset and author-corrected version of record of the manuscript is available on our site with no access controls, subscription charges or pay-per-view fees (<http://bmjopen.bmj.com>).

If you have any questions on BMJ Open's open peer review process please email [editorial.bmjopen@bmj.com](mailto:editorial.bmjopen@bmj.com)

# BMJ Open

## Increased risk of ischemic stroke in patients with migraine: A longitudinal follow-up study using a national sample cohort in Korea

|                               |                                                                                                                                                                                                                                 |
|-------------------------------|---------------------------------------------------------------------------------------------------------------------------------------------------------------------------------------------------------------------------------|
| Journal:                      | <i>BMJ Open</i>                                                                                                                                                                                                                 |
| Manuscript ID                 | bmjopen-2018-027701                                                                                                                                                                                                             |
| Article Type:                 | Research                                                                                                                                                                                                                        |
| Date Submitted by the Author: | 04-Nov-2018                                                                                                                                                                                                                     |
| Complete List of Authors:     | Lee, Sang-Yeon<br>Lim, Jae-Sung<br>Oh, Dong Jun; Asan Medical Center, University of Ulsan College of Medicine<br>Kong, Il Gyu; Hallym University College of Medicine, Otorhinolaryngology<br>Choi, Hyo Geun; Hallym University, |
| Keywords:                     | EPIDEMIOLOGY, Migraine < NEUROLOGY, Stroke < NEUROLOGY                                                                                                                                                                          |
|                               |                                                                                                                                                                                                                                 |

SCHOLARONE™  
Manuscripts

1  
2  
3  
4 1 **Increased risk of ischemic stroke in patients with**  
5  
6  
7 2 **migraine: A longitudinal follow-up study using a national**  
8  
9  
10 3 **sample cohort in Korea**  
11  
12  
13  
14 4

15  
16 5 Sang-Yeon Lee<sup>1</sup>, Jae-Sung Lim<sup>2</sup>, Dong Jun Oh<sup>3</sup>, Il Gyu Kong<sup>4</sup>, Hyo Geun Choi<sup>4\*</sup>  
17  
18 6

19  
20 7 <sup>1</sup>Department of Otorhinolaryngology-Head and Neck Surgery, Seoul National University  
21  
22 8 Hospital, Seoul National University College of Medicine, Seoul, South Korea  
23  
24

25 9 <sup>2</sup>Department of Neurology, Hallym University College of Medicine, Anyang, Korea  
26

27 10 <sup>3</sup>Department of Internal Medicine, Asan Medical Center, University of Ulsan College of  
28  
29 11 Medicine, Seoul  
30

31 12 <sup>4</sup>Department of Laboratory Medicine, Hallym University College of Medicine, Anyang,  
32  
33 13 Korea  
34  
35

36 14  
37  
38 15 Corresponding author: Hyo Geun Choi

39  
40 16 Department of Otorhinolaryngology-Head & Neck Surgery, Hallym University Sacred Heart  
41  
42 17 Hospital, 22, Gwanpyeong-ro 170beon-gil, Dongan-gu, Anyang-si, Gyeonggi-do, 14068  
43  
44 18 Republic of Korea  
45

46 19 Tel: 82-31-380-3849  
47

48 20 Fax: 82-31-386-3860  
49

50 21 Email: [pupen@naver.com](mailto:pupen@naver.com)  
51  
52  
53  
54  
55 22

56  
57 23 Word Count:3226  
58  
59  
60

1  
2  
3 **24 Abstract**  
4

5 **25 Objective:** Growing evidence has supported the association between migraine and stroke, but  
6  
7  
8 **26** the causative association remains unclear at present. According to stroke type, we aimed to  
9  
10 **27** investigate the risk of stroke in patients with migraine using a national sample cohort from  
11  
12 **28** Korea.

13  
14 **29 Design:** A longitudinal follow-up study

15  
16  
17 **30** Setting: Data from 2002 to 2013 national cohort collected by Korean Health Insurance  
18  
19 **31** Review and Assessment were used.

20  
21 **32 Participants:** We extracted the data from patients with migraine (n = 41,585) and 1:4-  
22  
23  
24 **33** matched controls (n = 166,340) and analyzed the occurrence of ischemic and hemorrhagic  
25  
26 **34** strokes. The migraine group included participants diagnosed with migraine (ICD-10: G43)  $\geq$   
27  
28 **35** 2 times. Hemorrhagic stroke (I60-I62) and ischemic stroke (I63) were determined using  
29  
30 **36** admission histories. The crude and adjusted hazard ratios (HRs) were calculated using Cox  
31  
32 **37** proportional hazard models, and the 95% confidence intervals (CIs) were determined.  
33  
34  
35 **38** Subgroup analyses based on age and sex were also performed.

36  
37 **39 Results:** The rates of ischemic stroke were higher in the migraine group (2.3% [964/41, 585])  
38  
39  
40 **40** than in the control group (2.0% [3,294/163,046],  $P < 0.001$ ). The adjusted HR of ischemic  
41  
42 **41** stroke was 1.18 (95% CI = 1.10-1.26) in the migraine group ( $P < 0.001$ ). The strongest  
43  
44 **42** association between migraine and ischemic stroke was found in young women. The  
45  
46 **43** contribution of migraine to the occurrence of ischemic stroke was also observed in middle  
47  
48 **44** aged women, old women, and young men (each  $P < 0.05$ ). The risk of hemorrhagic stroke did  
49  
50 **45** not reach statistical significance.

51  
52 **46 Conclusion:** Migraine is associated with an increased risk of ischemic stroke but not  
53  
54  
55 **47** hemorrhagic stroke.  
56  
57

1  
2  
3 48 Keywords: migraine, stroke, cohort study, Korea  
4  
5  
6 49  
7

8 50 **STRENGTHS AND LIMITATIONS OF THIS STUDY**  
9

10 51 \* Migraine is associated with the increased risk of developing ischemic stroke.  
11

12 52 \* The strongest association between migraine and ischemic stroke was found in young  
13  
14 53 women (20-39 years old).  
15

16 54 \* A higher risk of hemorrhagic stroke in patients with migraine did not reach statistical  
17  
18 55 significance, but it awaits further confirmation.  
19  
20  
21  
22 56  
23  
24 57  
25  
26 58  
27  
28 59  
29  
30  
31 60  
32  
33 61  
34  
35 62  
36  
37 63  
38  
39 64  
40  
41 65  
42  
43 66  
44  
45 67  
46  
47 68  
48  
49 69  
50  
51 70  
52  
53 71  
54  
55  
56  
57  
58  
59  
60

## 72 **Introduction**

73 Migraine is a common neurovascular disorder characterized by recurrent disabling episodes  
74 of headache, most often unilateral headache. The headache is partly accompanied with visual  
75 or sensory symptoms, namely, aura.<sup>1</sup> The annual prevalence of migraine is approximately  
76 8%–15% worldwide,<sup>2,3</sup> and in Korea, the estimated incidence is 6.1%.<sup>4</sup> Migraine appears to  
77 present at a relatively young age (< 45 years); it is more prevalent in women than men, with a  
78 prevalence of > 25% in the 35–39-year-old female population worldwide.<sup>1</sup> The use of  
79 migraine as an independent risk factor for cardiovascular events has been debated for many  
80 years, but it is an established risk factor for ischemic stroke.<sup>5</sup>

81 Stroke is a cerebrovascular condition involving limitation of blood flow to the brain due  
82 to blockage or rupture in the cerebrovascular system.<sup>6</sup> Stroke is responsible for approximately  
83 700,000 deaths annually in the Western world.<sup>7</sup> In Korea, the estimated stroke incidence is  
84 approximately 795,000 in people aged  $\geq 30$  years.<sup>8</sup> More than 80% of stroke cases are  
85 ischemic, and the rest are hemorrhagic; ischemic and hemorrhagic strokes differ with regard  
86 to risk factors, genetic predisposition, and mortality rates.<sup>9,10</sup>

87 To date, several underlying physiological mechanisms have been suggested to explain the  
88 association between migraine and stroke. The risk factors for stroke in migraineurs have been  
89 widely evaluated; the common comorbidities, including hypertension, obesity, dyslipidemia,  
90 and smoking, were validated.<sup>11</sup> In addition, specific genetic etiologies associated with  
91 vasculopathy can manifest in both migraine and stroke.<sup>12</sup> A recent investigation employing a  
92 migraine mutant mouse model also indicated that shared genetic risk factors rendered the  
93 brain more vulnerable to ischemic stroke.<sup>13</sup>

94 Moreover, migraine itself carries an increased risk of ischemic stroke. Recently, a  
95 population-based case-control study in Taiwan demonstrated an association between

1  
2  
3 96 migraine and ischemic stroke (adjusted hazard ratio [HR]: 1.24, confidence interval [CI]:  
4  
5 97 1.12–1.38).<sup>3</sup> Similarly, an increased risk of ischemic stroke has been consistently found in  
6  
7 98 migraineurs, especially in those with migraine with aura.<sup>3 14-17</sup> Furthermore, growing  
8  
9 99 evidence has supported the association between migraine and hemorrhagic stroke,<sup>18 19</sup> but the  
10  
11  
12 100 causative association remains unclear at present. Given that stroke is a leading cause of  
13  
14 101 mortality, validation of the association between migraine and stroke may facilitate treatment  
15  
16  
17 102 and prognosis in such cases.

18  
19 103 Herein, by using a national Korean population-based sample cohort, we examined the  
20  
21 104 association between migraine and stroke. We extracted data for patients with migraine and a  
22  
23 105 1:4-matched control group and analyzed the occurrence of ischemic stroke and hemorrhagic  
24  
25  
26 106 stroke in this cohort. Subgroup analyses according to age and sex were also performed.  
27  
28  
29 107

## 30 108 **Materials and Methods**

### 31 109 **Study Population and Data Collection**

32  
33  
34  
35 110 The ethics committee of Hallym University (2014-I148) approved the use of these data. The  
36  
37 111 Institutional Review Board exempted the requirement for written informed consent.

38  
39 112 This national cohort study used data from the Korean National Health Insurance  
40  
41 113 Service-National Sample Cohort (NHIS-NSC). The Korean NHIS selects samples directly  
42  
43 114 from the entire population database to prevent non-sampling errors. Approximately 2% of the  
44  
45 115 samples (one million) were selected from the entire Korean population (50 million). The  
46  
47 116 selected data were classified into 1,476 levels (age [18 categories], sex [2 categories], and  
48  
49 117 income level [41 categories]) using randomized stratified systematic sampling methods via  
50  
51 118 proportional allocation to represent the entire population. A previous study verified the  
52  
53  
54 119 appropriateness of the sample after data selection.<sup>20</sup> The National Health Insurance Sharing

1  
2  
3 120 Service provides a detailed description of the methods used to perform these procedures.<sup>21</sup>  
4  
5 121 This cohort database included (i) personal information, (ii) health insurance claim codes  
6  
7 122 (procedures and prescriptions), (iii) diagnostic codes using the International Classification of  
8  
9 123 Disease-10 (ICD-10), (iv) death records from the Korean National Statistical Office (using  
10  
11 124 the Korean Standard Classification of disease), (v) socio-economic data (residence and  
12  
13 125 income), and (vi) medical examination data for each participant from 2002 to 2013.

14  
15  
16 126 All Korean citizens are recognized by a 13-digit resident registration number from birth  
17  
18 127 to death. Therefore, exact population statistics have been determined using this database. All  
19  
20 128 Koreans are required to enroll in the NHIS. All Korean hospitals and clinics use the 13-digit  
21  
22 129 resident registration number to register individual patients in the medical insurance system.  
23  
24 130 Therefore, the risk of overlapping medical records is minimal, even if a patient moves from  
25  
26 131 one place to another. All medical treatments in Korea are tracked without exception using the  
27  
28 132 Health Insurance Review & Assessment (HIRA) system. In Korea, the law states that a notice  
29  
30 133 of death must be provided to an administrative entity before a funeral can be held. Medical  
31  
32 134 doctors record the date and cause of death on a death certificate.  
33  
34  
35  
36  
37  
38  
39

#### 40 136 **Participant Selection**

41  
42 137 Out of 1,125,691 cases with 114,369,638 medical claim codes, participants who were  
43  
44 138 diagnosed with migraine (ICD-10: G43) were included. Among them, participants who were  
45  
46 139 treated  $\geq 2$  times ( $n = 45,587$ ) were selected. The participants were followed up for 12 years.

47  
48  
49 140 The history of admission for hemorrhagic stroke (I60: Subarachnoid hemorrhage, I61:  
50  
51 141 Intracerebral hemorrhage, and I62: Other nontraumatic intracranial hemorrhage) and  
52  
53 142 ischemic stroke (I63: Cerebral infarction) was identified using ICD-10 codes. We selected the  
54  
55  
56  
57  
58  
59  
60



1  
2  
3 143 participants who were treated  $\geq 1$  times. These methods were used in other studies evaluating  
4  
5 144 the incidence of stroke in Korea.<sup>8 22</sup>  
6

7  
8 145 The migraine participants were matched 1:4 with participants (control group) who were  
9  
10 146 never diagnosed with a migraine from 2002 through 2013 in this cohort. The control groups  
11  
12 147 were selected from the mother population (n = 1,080,104). The matches were processed for  
13  
14 148 age, group, sex, income group, region of residence, and past medical histories (hypertension,  
15  
16 149 diabetes, and dyslipidemia). To prevent selection bias when selecting the matched  
17  
18 150 participants, we sorted the control group participants using a random number order, and they  
19  
20 151 were then selected from top to bottom. It was assumed that the matched control participants  
21  
22 152 were involved at the same time as each matched migraine participant (index date). Therefore,  
23  
24 153 control group members who died before the index date were excluded. In both the migraine  
25  
26 154 and control groups, participants with histories of hemorrhagic or ischemic stroke before the  
27  
28 155 index date were excluded. In the migraine group, 438 participants were excluded. The  
29  
30 156 migraine participants for whom we could not identify sufficient numbers of matching  
31  
32 157 participants were excluded (n = 185). We excluded participants under 20 years old (n =  
33  
34 158 3,379). Finally, 1:4 matching resulted in the inclusion of 41,585 migraine participants and  
35  
36 159 166,340 control participants (Fig.1).  
37  
38  
39  
40  
41  
42  
43  
44

## 45 161 **Variables**

46  
47 162 The age groups were classified using 5-year intervals: 20-24, 25-29, 30-34..., and 85+ years  
48  
49 163 old. A total of 14 age groups were designated. The income groups were initially divided into  
50  
51 164 41 classes (one health aid class, 20 self-employment health insurance classes, and 20  
52  
53 165 employment health insurance classes). These groups were re-categorized into 11 classes  
54  
55 166 (class 1 [lowest income]–class 11 [highest income]). Region of residence was divided into 16  
56  
57  
58  
59  
60

1  
2  
3 167 areas according to administrative district. These regions were regrouped into urban (Seoul,  
4  
5 168 Busan, Daegu, Incheon, Gwangju, Daejeon, and Ulsan) and rural (Gyeonggi, Gangwon,  
6  
7 169 Chungcheongbuk, Chungcheongnam, Jeollabuk, Jeollanam, Gyeongsangbuk,  
8  
9  
10 170 Gyeongsangnam, and Jeju) areas.

11  
12 171 The past medical histories of the participants were evaluated using ICD-10 codes. For  
13  
14 172 the accuracy of diagnosis, hypertension (I10 and I15), diabetes (E10-E14), and dyslipidemia  
15  
16 173 (E78) were assessed if the participants were treated  $\geq 2$  times.  
17  
18  
19 174

### 20 21 175 **Statistical Analyses**

22  
23 176 Chi-square tests were used to compare the general characteristics between the migraine and  
24  
25 177 control groups. For analysis of the HRs of migraine on hemorrhagic stroke and ischemic  
26  
27 178 stroke, Cox proportional hazard models were used, and 95% CIs were calculated. In these  
28  
29 179 analyses, crude (simple) and adjusted (age, sex, income, region of residence, hypertension,  
30  
31 180 diabetes, and dyslipidemia) models were used. For the subgroup analysis, we divided the  
32  
33 181 participants by age and sex (20–39 years old, 40–59 years old, 60+ years old; men and  
34  
35 182 women). Two-tailed analyses were conducted, and P values less than 0.05 were considered  
36  
37 183 significant. The results were statistically analyzed using SPSS v. 21.0 (IBM, Armonk, NY,  
38  
39 184 USA).  
40  
41  
42  
43  
44  
45  
46  
47  
48

### 49 186 **Results**

50 187 The mean follow-up was 80.9 (standard deviation [SD] = 41.6) months in migraine patients  
51  
52 188 and 80.9 (SD = 41.6) months in controls. The rates of hemorrhagic stroke were not higher in  
53  
54 189 the migraine group (0.7% [295/41,585]) than the control group (0.7% [1,113/166,340], P =  
55  
56 190 0.370, Table 1). The rates of ischemic stroke were higher in the migraine group (2.3%

191 [964/41,585]) than the control group (2.0% [3,294/163,046].  $P < 0.001$ ). The general  
 192 characteristics (age, sex, income, region of residence, hypertension, diabetes, and  
 193 dyslipidemia histories) of participants were the same due to the matching protocol ( $P =$   
 194 1.000).

195

196 **Table 1 General Characteristics of Participants**

| Characteristics | Total participants |                |         |
|-----------------|--------------------|----------------|---------|
|                 | Psoriasis (n, %)   | Control (n, %) | P-value |
| Age (years old) |                    |                | 1.000   |
| 20-24           | 1,994 (4.8)        | 7,976 (4.8)    |         |
| 25-29           | 2,649 (6.4)        | 10,596 (6.4)   |         |
| 30-34           | 3,640 (8.8)        | 14,560 (8.8)   |         |
| 35-39           | 4,309 (10.4)       | 17,236 (10.4)  |         |
| 40-44           | 4,859 (11.7)       | 19,436 (11.7)  |         |
| 45-49           | 5,187 (12.5)       | 20,748 (12.5)  |         |
| 50-54           | 4,512 (10.9)       | 18,048 (10.9)  |         |
| 55-59           | 3,508 (8.4)        | 14,032 (8.4)   |         |
| 60-64           | 3,209 (7.7)        | 12,836 (7.7)   |         |
| 65-69           | 3,049 (7.3)        | 12,196 (7.3)   |         |
| 70-74           | 2,328 (5.6)        | 9,312 (5.6)    |         |
| 75-79           | 1,423 (3.4)        | 5,692 (3.4)    |         |
| 80-84           | 651 (1.6)          | 2,604 (1.6)    |         |
| 85+             | 267 (0.6)          | 1,068 (0.6)    |         |
| Sex             |                    |                | 1.000   |

|                     |               |                |       |
|---------------------|---------------|----------------|-------|
| Male                | 10,476 (25.2) | 41,904 (25.2)  |       |
| Female              | 31,109 (74.8) | 124,436 (74.8) |       |
| Income              |               |                | 1.000 |
| 1 (lowest)          | 837 (2.0)     | 3,348 (2.0)    |       |
| 2                   | 3,170 (7.6)   | 12,680 (7.6)   |       |
| 3                   | 3,004 (7.2)   | 12,016 (7.2)   |       |
| 4                   | 3,131 (7.5)   | 12,524 (7.5)   |       |
| 5                   | 3,345 (8.0)   | 13,380 (8.0)   |       |
| 6                   | 3,615 (8.7)   | 14,460 (8.7)   |       |
| 7                   | 3,908 (9.4)   | 15,632 (9.4)   |       |
| 8                   | 4,411 (10.6)  | 17,644 (10.6)  |       |
| 9                   | 4,908 (11.8)  | 19,632 (11.8)  |       |
| 10                  | 5,456 (13.1)  | 21,824 (13.1)  |       |
| 11 (highest)        | 5,800 (13.9)  | 23,200 (13.9)  |       |
| Region of residence |               |                | 1.000 |
| Urban               | 17,959 (43.2) | 71,836 (43.2)  |       |
| Rural               | 23,626 (56.8) | 94,504 (56.8)  |       |
| Hypertension        |               |                | 1.000 |
| Yes                 | 16,209 (39.0) | 64,836 (39.0)  |       |
| No                  | 25,376 (61.0) | 101,504 (61.0) |       |
| Diabetes            |               |                | 1.000 |
| Yes                 | 7,261 (17.5)  | 29,044 (17.5)  |       |
| No                  | 34,324 (82.5) | 137,296 (82.5) |       |
| Dyslipidemia        |               |                | 1.000 |

|                    |               |                |         |
|--------------------|---------------|----------------|---------|
| Yes                | 12,837 (30.9) | 51,348 (30.9)  |         |
| No                 | 28,748 (69.1) | 114,992 (69.1) |         |
| Hemorrhagic stroke |               |                | 0.370   |
| Yes                | 295 (0.7)     | 1,113 (0.7)    |         |
| No                 | 41,290 (99.3) | 165,227 (99.3) |         |
| Ischemic stroke    |               |                | <0.001* |
| Yes                | 964 (2.3)     | 3,294 (2.0)    |         |
| No                 | 40,621 (97.7) | 163,046 (98.0) |         |

197

198 \*Chi-square test. Significance at  $P < 0.05$ 

199

200 The crude and adjusted HRs of hemorrhagic stroke were 1.06 (95% CI = 0.93–1.21,  $P =$   
 201 0.369) and 1.06 (95% CI = 0.93–1.21,  $P = 0.371$ ), respectively, in the migraine group (Table  
 202 2). The crude and adjusted HRs of ischemic stroke were 1.17 (95% CI = 1.09–1.26) and 1.18  
 203 (95% CI = 1.10–1.26), respectively, in the migraine group (each  $P < 0.001$ ).

204

205

206

207 **Table 2 Crude and adjusted hazard ratios (95% confidence interval) of migraine for hemorrhagic stroke and ischemic stroke**

| Characteristics | Hemorrhagic stroke |         |                  |         | Ischemic stroke  |         |                  |         |
|-----------------|--------------------|---------|------------------|---------|------------------|---------|------------------|---------|
|                 | Crude              | P-value | Adjusted†        | P-value | Crude            | P-value | Adjusted†        | P-value |
| Migraine        |                    | 0.369   |                  | 0.371   |                  | <0.001* |                  | <0.001* |
| Yes             | 1.06 (0.93-1.21)   |         | 1.06 (0.93-1.21) |         | 1.17 (1.09-1.26) |         | 1.18 (1.10-1.26) |         |
| No              | 1.00               |         | 1.00             |         | 1.00             |         | 1.00             |         |

208

209 \* Cox-proportional hazard regression model, Significance at P &lt; 0.05

210 † Adjusted model for age, sex, income, region of residence, hypertension, diabetes, and dyslipidemia histories

211

1  
2  
3 212 In the subgroup analyses, all crude and adjusted HRs of hemorrhagic stroke did not reach  
4  
5 213 statistical significance (Table 3). For patients with ischemic stroke, young men, young  
6  
7 214 women, middle aged men, old men, and old women showed statistical significance (each  $P <$   
8  
9 215 0.05). The significant adjusted HRs were 2.15 (95% CI = 1.15–4.02) in  $< 40$ -year-old men;  
10  
11 216 2.54 (95% CI = 1.55–4.15) in  $< 40$ -year-old women; 1.36 (95% CI = 1.36–1.64) in 40–59-  
12  
13 217 year-old women; and 1.17 (95% CI = 1.06–1.29) in  $\geq 60$ -year-old women.  
14  
15  
16  
17 218  
18  
19 219  
20  
21 220  
22  
23 221  
24  
25 222  
26  
27 223  
28  
29 224  
30  
31 225  
32  
33 226  
34  
35 227  
36  
37 228  
38  
39 229  
40  
41 230  
42  
43 231  
44  
45 232  
46  
47 233  
48  
49 234  
50  
51 235  
52  
53  
54  
55  
56  
57  
58  
59  
60

236 **Table 3 Subgroup analysis of crude and adjusted hazard ratios (95% confidence interval) of migraine for hemorrhagic stroke and**  
 237 **ischemic stroke**

| Characteristics                                      | Hemorrhagic stroke |         |                  |         | Ischemic stroke  |         |                  |         |
|------------------------------------------------------|--------------------|---------|------------------|---------|------------------|---------|------------------|---------|
|                                                      | Crude              | P-value | Adjusted†        | P-value | Crude            | P-value | Adjusted†        | P-value |
| <b>Young men (20-39 years old, n = 15,550)</b>       |                    |         |                  |         |                  |         |                  |         |
| Migraine                                             |                    | 0.158   |                  | 0.158   |                  | 0.017*  |                  | 0.017*  |
| Yes                                                  | 1.56 (0.84-2.89)   |         | 1.56 (0.84-2.89) |         | 2.15 (1.15-4.02) |         | 2.15 (1.15-4.02) |         |
| No                                                   | 1.00               |         | 1.00             |         | 1.00             |         | 1.00             |         |
| <b>Young women (20-39 years old, n = 47,410)</b>     |                    |         |                  |         |                  |         |                  |         |
| Migraine                                             |                    | 0.726   |                  | 0.726   |                  | <0.001* |                  | <0.001* |
| Yes                                                  | 1.10 (0.64-1.92)   |         | 1.10 (0.64-1.92) |         | 2.54 (1.55-4.15) |         | 2.54 (1.55-4.15) |         |
| No                                                   | 1.00               |         | 1.00             |         | 1.00             |         | 1.00             |         |
| <b>Middle aged men (40-59 years old, n = 22,090)</b> |                    |         |                  |         |                  |         |                  |         |
| Migraine                                             |                    | 0.721   |                  | 0.725   |                  | 0.565   |                  | 0.565   |
| Yes                                                  | 1.07 (0.73-1.56)   |         | 1.07 (0.73-1.56) |         | 0.93 (0.71-1.21) |         | 0.93 (0.71-1.21) |         |



1  
2  
3  
4  
5  
6  
7  
8  
9  
10  
11  
12  
13  
14  
15  
16  
17  
18  
19  
20  
21  
22  
23  
24  
25  
26  
27  
28  
29  
30  
31  
32

|                                                        |                  |                  |                  |                  |
|--------------------------------------------------------|------------------|------------------|------------------|------------------|
| No                                                     | 1.00             | 1.00             | 1.00             | 1.00             |
| <b>Middle aged women (40-59 years old, n = 68,240)</b> |                  |                  |                  |                  |
| Migraine                                               | 0.582            | 0.583            | 0.002*           | 0.002*           |
| Yes                                                    | 1.07 (0.84-1.38) | 1.07 (0.84-1.38) | 1.35 (1.12-1.64) | 1.36 (1.12-1.64) |
| No                                                     | 1.00             | 1.00             | 1.00             | 1.00             |
| <b>Old men (60+ years old, n = 14,740)</b>             |                  |                  |                  |                  |
| Migraine                                               | 0.115            | 0.116            | 0.275            | 0.279            |
| Yes                                                    | 1.29 (0.94-1.78) | 1.29 (0.94-1.78) | 1.09 (0.93-1.27) | 1.09 (0.93-1.27) |
| No                                                     | 1.00             | 1.00             | 1.00             | 1.00             |
| <b>Old women (60+ years old, n = 39,895)</b>           |                  |                  |                  |                  |
| Migraine                                               | 0.462            | 0.464            | 0.002*           | 0.002*           |
| Yes                                                    | 0.92 (0.75-1.14) | 0.92 (0.75-1.14) | 1.17 (1.06-1.29) | 1.17 (1.06-1.29) |
| No                                                     | 1.00             | 1.00             | 1.00             | 1.00             |

238 \* Cox-proportional hazard regression model, Significance at P < 0.05

239 † Adjusted model for age, sex, income, region of residence, hypertension, diabetes, and dyslipidemia histories

43  
44  
45  
46

## 240 **Discussion**

241 Migraine appeared to increase the risk of ischemic stroke but not of hemorrhagic stroke. The  
242 risk of ischemic stroke was 1.18-fold greater in the patients with migraine than in the  
243 matched control subjects, even after adjustment for confounding factors. In the subgroup  
244 analyses by age and sex, the relationship with ischemic stroke was observed primarily in  
245 young women, middle aged women, old women, and young men, all of whom showed a  
246 significant correlation. In contrast, the risk of hemorrhagic stroke was not higher in patients  
247 with migraine than in the matched control patients.

248 Migraine, especially migraine with aura, is an established risk factor for ischemic stroke.  
249 Migraine with aura especially increased the risk of ischemic stroke based on the results of  
250 large population-based cohort studies and meta-analyses.<sup>3 14-17</sup> Cortical spreading depression  
251 (CSD) is a self-propagating wave of depolarization across the cerebral cortex at a slow  
252 velocity, 3 to 5 mm/min.<sup>23</sup> CSD has been implicated in migraine with aura, which plays a  
253 critical role in the pathophysiology of ischemic stroke. In an experimental study, CSD  
254 induced tone alterations in resistance vessels, causing hypoperfusion in tissue at risk for  
255 progressive damage, namely, cortical spreading ischemia.<sup>24</sup> In addition, the inflammatory  
256 cascade of the neurovascular system, characterized by endothelial dysfunction and  
257 coagulation abnormalities, may contribute to the development of ischemic stroke. In the aura  
258 phase, the endothelium activates coagulation and thrombosis, which are mediated by  
259 inflammatory cytokines and endothelial biomarkers.<sup>25 26</sup> Moreover, specific genetic  
260 etiologies, such as Factor V Leiden G 619 1A, prothrombin G20210A, and familial  
261 hemiplegic migraine type 1, were reported in migraine with aura. These shared genetic  
262 factors may precipitate the susceptibility to CSD, which may explain the association between  
263 migraine and stroke.<sup>27</sup>

1  
2  
3 264 There is a growing body of evidence regarding the increased risk of ischemic stroke in  
4  
5 265 migraine without aura. Notably, a significant association was found in cases of ischemic  
6  
7 266 stroke resulting from cervical artery dissection.<sup>28</sup> In addition, genetic overlaps among  
8  
9  
10 267 migraine without aura, large artery stroke, and cardio-embolic stroke have been identified.<sup>29</sup>  
11  
12 268 However, strong evidence has been not reported. A recent large population-based study  
13  
14 269 demonstrated an insignificant risk of ischemic stroke in patients with migraine without aura  
15  
16  
17 270 but an increased risk in patients with migraine with aura.<sup>3</sup> The study suggested that the  
18  
19 271 difference may be due to lipid profile, susceptibility to thrombosis, and genetic  
20  
21 272 predisposition.<sup>3</sup> A meta-analysis found that there was no significant association between  
22  
23 273 migraine without aura and ischemic stroke.<sup>17</sup> In the present study, we did not differentiate  
24  
25  
26 274 between migraine subtypes, such as migraine with and without aura, when analyzing the risk  
27  
28 275 of stroke. Given this, the risk of ischemic stroke in migraine was relatively low despite  
29  
30 276 statistical significance compared to that of other studies investigating specific conditions.

31  
32  
33 277 Notably, in this study, migraine was not linked to an increased risk of hemorrhagic stroke.  
34  
35 278 In contrast to the present study, a recent meta-analysis, based on 4 case-control and 4 cohort  
36  
37 279 studies, concluded that migraine may increase the risk of hemorrhagic stroke.<sup>19</sup> However, a  
38  
39 280 recent large population-based case-control study did not show an association with  
40  
41  
42 281 hemorrhagic stroke type, including intracerebral hemorrhage and subarachnoid hemorrhage.  
43  
44 282 <sup>30</sup> Migraine was an independent risk factor for aneurismal rupture (OR = 2.4; CI 95% 1.1–  
45  
46 283 5.1) in a case-control study,<sup>31</sup> and even if headache is a premonitory symptom of aneurismal  
47  
48 284 rupture, recall biases might have affected the study results. Above all, a relatively small  
49  
50 285 number of hemorrhagic stroke cases might have resulted in decreased statistical power.

51  
52  
53 286 Consistent with the results of previous studies, the strongest association between migraine  
54  
55 287 and ischemic stroke was found in young women. The contribution of migraine to the

1  
2  
3 288 occurrence of ischemic stroke was shown to decrease as age increases. Considering that the  
4  
5 289 predisposing factors of stroke increase the incidence of ischemic stroke with age,<sup>32</sup> migraine  
6  
7 290 itself rather than other risk factors could be implicated in the increased risk of ischemic  
8  
9 291 stroke. Notably, we identified a significant association of migraine with ischemic stroke in  
10  
11 292 middle aged and old women in this study. In contrast, a recent large population-based cohort  
12  
13 293 study in Taiwan, with a relatively short follow-up duration of 3.6 years, did not show a  
14  
15 294 significant association in the subset groups of women and those aged < 45 years.<sup>3</sup> This  
16  
17 295 discrepancy might be due to differences in the study design, follow-up duration, and ethnic  
18  
19 296 composition of the study population. In addition, we demonstrated a significant association of  
20  
21 297 ischemic stroke in young men with migraine. Recently, a trend of this association was also  
22  
23 298 reported,<sup>3</sup> but it requires further confirmation due to the lack of evidence at present.

24  
25  
26 299 The present study has several strengths. The results of this study are consistent with those  
27  
28 300 of our previous studies utilizing the HIRA-NSC.<sup>33-35</sup> We examined a very large,  
29  
30 301 representative, and nationwide population. Because the NHIS data cover all citizens of Korea  
31  
32 302 without exception, no participants were lost during follow-up. The control group was  
33  
34 303 randomly selected and matched based on age, sex, income, region of residence, and medical  
35  
36 304 history to decrease any confounding effects. An adjusted hazard model was used to further  
37  
38 305 minimize the impact of confounders. Considering that migraine attacks could be frequently  
39  
40 306 repeated, we opted to include patients with migraine who underwent treatment at least twice  
41  
42 307 based on the ICD-10 code to enhance the validity of the study [G43]. In a previous study, the  
43  
44 308 prevalence of migraine in Korea was reported as being approximately 6.1%.<sup>4</sup> This value  
45  
46 309 appeared to be slightly higher than that in the present study, which was 3.7%  
47  
48 310 (41,585/1,125,691) based on strict inclusion criteria of migraine. In addition, the patients with  
49  
50 311 migraine were followed up for 12 years in the present study. Long study periods enable  
51  
52  
53  
54  
55  
56  
57  
58  
59  
60

1  
2  
3 312 recruitment of a large study population and enable researchers to observe and analyze the  
4  
5 313 delayed effects of migraine on stroke.  
6  
7

8 314 However, the present study has certain limitations that should be addressed in future  
9  
10 315 studies. First, the heterogeneity of migraine was not considered in the present study.  
11  
12 316 Considering that the association could be modulated according to migraine subtype,<sup>36</sup> the  
13  
14 317 present study could not draw a causative association. A firm correlation between the  
15  
16 318 frequency of migraine attacks and the risk of stroke was found,<sup>37</sup> but it could not be assessed  
17  
18 319 using this database. Similarly, the duration and severity of migraine were inconsistent among  
19  
20 320 the study population. Patients with migraine who had mild complaints could not undergo  
21  
22 321 consultation at the clinic; therefore, the impact of migraine on stroke may be underestimated  
23  
24 322 in this study. Third, although this study attempted to include a representative large population  
25  
26 323 and subsequently matched and adjusted for possible confounders, the risk factors for stroke in  
27  
28 324 patients with migraine, such as cigarette smoking, obesity, and migraine-specific drugs, were  
29  
30 325 not available in the insurance database.<sup>11 37</sup>  
31  
32  
33  
34  
35  
36  
37

### 38 **Conclusion**

39  
40 328 Based on a large population-based cohort study in Korea, migraine increased the risk of  
41  
42 329 ischemic stroke but not of hemorrhagic stroke. The subgroup of patients at the highest risk of  
43  
44 330 ischemic stroke was young women.  
45  
46  
47  
48  
49

### 50 **ACKNOWLEDGMENTS**

51  
52 333 We thanks to the participants and examiners of Korean Health Insurance Review and  
53  
54 334 Assessment for participating in this cohort study and providing the data.  
55  
56  
57  
58  
59  
60

1  
2  
3 336 **DATA SHARING STATEMENT**  
4

5 337 No additional data are available.  
6  
7

8 338  
9

10 339 **FUNDING STATEMENT**  
11

12 340 This work was supported by the Hallym University Research Fund and in part by a research  
13

14 341 grant (NRF-2015-R1D1A1A01060860) from the National Research Foundation (NRF) of  
15

16 342 Korea.  
17  
18

19 343  
20

21 344 **COMPETING INTERESTS STATEMENT**  
22

23 345 There are no competing interests for any author.  
24  
25

26 346  
27

28 347 **AUTHOR CONTRIBUTIONS**  
29

30 348 As first authors, SYL wrote the manuscript. DJO and JSL analyzed and interpreted the data.  
31

32 349 IGK performed the data processing. HGC conceptualized, wrote and reviewed the  
33

34 350 manuscript.  
35  
36

37 351  
38

39 352  
40

41 353  
42

43 354  
44

45 355  
46

47 356  
48

49 357  
50

51 358  
52

53 359  
54  
55  
56  
57

1  
2  
3 360 **References**  
4

- 5 361 1. Charles A. Migraine. *N Engl J Med* 2017;377(6):553-61. doi: 10.1056/NEJMcp1605502  
6  
7 362 2. Lipton RB, Scher AI, Kolodner K, et al. Migraine in the United States: epidemiology and  
8  
9 patterns of health care use. *Neurology* 2002;58(6):885-94.  
10 363  
11  
12 364 3. Peng KP, Chen YT, Fuh JL, et al. Migraine and incidence of ischemic stroke: A  
13  
14 nationwide population-based study. *Cephalalgia* 2017;37(4):327-35. doi:  
15 365  
16 10.1177/0333102416642602  
17 366  
18  
19 367 4. Kim BK, Chu MK, Lee TG, et al. Prevalence and impact of migraine and tension-type  
20  
21 headache in Korea. *J Clin Neurol* 2012;8(3):204-11. doi: 10.3988/jcn.2012.8.3.204  
22 368  
23  
24 369 5. Wood H. Migraine: Migraine - a risk factor for cardiovascular disease? *Nat Rev Neurol*  
25  
26 2018;14(4):194-95. doi: 10.1038/nrneurol.2018.18  
27 370  
28  
29 371 6. Feigin VL, Lawes CM, Bennett DA, et al. Worldwide stroke incidence and early case  
30  
31 fatality reported in 56 population-based studies: a systematic review. *The Lancet*  
32  
33 *Neurology* 2009;8(4):355-69.  
34 373  
35  
36 374 7. Ojaghihaghghi S, Vahdati SS, Mikaeilpour A, et al. Comparison of neurological clinical  
37  
38 manifestation in patients with hemorrhagic and ischemic stroke. *World journal of*  
39  
40 *emergency medicine* 2017;8(1):34.  
41 376  
42  
43 377 8. Hong KS, Bang OY, Kang DW, et al. Stroke statistics in Korea: part I. Epidemiology and  
44  
45 risk factors: a report from the korean stroke society and clinical research center for  
46  
47 stroke. *J Stroke* 2013;15(1):2-20. doi: 10.5853/jos.2013.15.1.2  
48 379  
49  
50 380 9. Andersen KK, Olsen TS, Dehlendorff C, et al. Hemorrhagic and ischemic strokes  
51  
52 compared: stroke severity, mortality, and risk factors. *Stroke* 2009;40(6):2068-72. doi:  
53  
54 10.1161/STROKEAHA.108.540112  
55 382  
56  
57  
58  
59  
60

- 1  
2  
3 383 10. Das S, Roy S, Kaul S, et al. E-selectin gene (S128R) polymorphism in hemorrhagic  
4  
5 384 stroke: comparison with ischemic stroke. *Neurosci Lett* 2014;581:125-8. doi:  
6  
7 385 10.1016/j.neulet.2014.08.032  
8  
9  
10 386 11. Gryglas A, Smigiel R. Migraine and Stroke: What's the Link? What to Do? *Curr Neurol*  
11  
12 387 *Neurosci Rep* 2017;17(3):22. doi: 10.1007/s11910-017-0729-y  
13  
14 388 12. Lee MJ, Lee C, Chung CS. The Migraine-Stroke Connection. *J Stroke* 2016;18(2):146-  
15  
16 389 56. doi: 10.5853/jos.2015.01683  
17  
18 390 13. Eikermann-Haerter K, Lee JH, Yuzawa I, et al. Migraine mutations increase stroke  
19  
20 391 vulnerability by facilitating ischemic depolarizations. *Circulation* 2012;125(2):335-  
21  
22 392 45. doi: 10.1161/CIRCULATIONAHA.111.045096  
23  
24 393 14. Kurth T, Schurks M, Logroscino G, et al. Migraine, vascular risk, and cardiovascular  
25  
26 394 events in women: prospective cohort study. *BMJ* 2008;337:a636. doi:  
27  
28 395 10.1136/bmj.a636  
29  
30 396 15. Kurth T, Gaziano JM, Cook NR, et al. Migraine and risk of cardiovascular disease in  
31  
32 397 women. *JAMA* 2006;296(3):283-91. doi: 10.1001/jama.296.3.283  
33  
34 398 16. Monteith TS, Gardener H, Rundek T, et al. Migraine and risk of stroke in older adults:  
35  
36 399 Northern Manhattan Study. *Neurology* 2015;85(8):715-21. doi:  
37  
38 400 10.1212/WNL.0000000000001854  
39  
40 401 17. Spector JT, Kahn SR, Jones MR, et al. Migraine headache and ischemic stroke risk: an  
41  
42 402 updated meta-analysis. *Am J Med* 2010;123(7):612-24. doi:  
43  
44 403 10.1016/j.amjmed.2009.12.021  
45  
46 404 18. Kuo CY, Yen MF, Chen LS, et al. Increased risk of hemorrhagic stroke in patients with  
47  
48 405 migraine: a population-based cohort study. *PLoS One* 2013;8(1):e55253. doi:  
49  
50 406 10.1371/journal.pone.0055253  
51  
52  
53  
54  
55  
56  
57  
58  
59  
60



- 1  
2  
3 407 19. Sacco S, Ornello R, Ripa P, et al. Migraine and hemorrhagic stroke: a meta-analysis.  
4  
5 408 *Stroke* 2013;44(11):3032-8. doi: 10.1161/STROKEAHA.113.002465  
6  
7  
8 409 20. Lee J, Lee JS, Park SH, et al. Cohort Profile: The National Health Insurance Service-  
9  
10 410 National Sample Cohort (NHIS-NSC), South Korea. *International journal of*  
11  
12 411 *epidemiology* 2016 doi: 10.1093/ije/dyv319  
13  
14  
15 412 21. <http://nhiss.nhis.or.kr/>.  
16  
17 413 22. Kim RB, Kim BG, Kim YM, et al. Trends in the incidence of hospitalized acute  
18  
19 414 myocardial infarction and stroke in Korea, 2006-2010. *J Korean Med Sci*  
20  
21 415 2013;28(1):16-24. doi: 10.3346/jkms.2013.28.1.16  
22  
23  
24 416 23. Tietjen EG. Migraine and ischaemic heart disease and stroke: potential mechanisms and  
25  
26 417 treatment implications. *Cephalalgia* 2007;27(8):981-7. doi: 10.1111/j.1468-  
27  
28 418 2982.2007.01407.x  
29  
30  
31 419 24. Dreier JP, Major S, Manning A, et al. Cortical spreading ischaemia is a novel process  
32  
33 420 involved in ischaemic damage in patients with aneurysmal subarachnoid  
34  
35 421 haemorrhage. *Brain* 2009;132(Pt 7):1866-81. doi: 10.1093/brain/awp102  
36  
37  
38 422 25. Liman TG, Bachelier-Walenta K, Neeb L, et al. Circulating endothelial microparticles in  
39  
40 423 female migraineurs with aura. *Cephalalgia* 2015;35(2):88-94.  
41  
42  
43 424 26. Rajendran P, Rengarajan T, Thangavel J, et al. The vascular endothelium and human  
44  
45 425 diseases. *International journal of biological sciences* 2013;9(10):1057.  
46  
47  
48 426 27. Pezzini A, Grassi M, Lodigiani C, et al. Predictors of migraine subtypes in young adults  
49  
50 427 with ischemic stroke: the italian project on stroke in young adults. *Stroke*  
51  
52 428 2011;42(1):17-21. doi: 10.1161/STROKEAHA.110.592246  
53  
54  
55  
56  
57  
58  
59  
60

- 1  
2  
3 429 28. De Giuli V, Grassi M, Lodigiani C, et al. Association between migraine and cervical  
4  
5 430 artery dissection: the Italian project on stroke in young adults. *JAMA neurology*  
6  
7 431 2017;74(5):512-18.  
8  
9  
10 432 29. Malik R, Freilinger T, Winsvold BS, et al. Shared genetic basis for migraine and ischemic  
11  
12 433 stroke: A genome-wide analysis of common variants. *Neurology* 2015;84(21):2132-  
13  
14 434 45. doi: 10.1212/WNL.0000000000001606  
15  
16  
17 435 30. Gaist D, Gonzalez-Perez A, Ashina M, et al. Migraine and risk of hemorrhagic stroke: a  
18  
19 436 study based on data from general practice. *J Headache Pain* 2014;15:74. doi:  
20  
21 437 10.1186/1129-2377-15-74  
22  
23  
24 438 31. Vlak MH, Rinkel GJ, Greebe P, et al. Risk of rupture of an intracranial aneurysm based  
25  
26 439 on patient characteristics: a case-control study. *Stroke* 2013;44(5):1256-9. doi:  
27  
28 440 10.1161/STROKEAHA.111.000679  
29  
30  
31 441 32. Tsai CF, Anderson N, Thomas B, et al. Comparing Risk Factor Profiles between  
32  
33 442 Intracerebral Hemorrhage and Ischemic Stroke in Chinese and White Populations:  
34  
35 443 Systematic Review and Meta-Analysis. *PLoS One* 2016;11(3):e0151743. doi:  
36  
37 444 10.1371/journal.pone.0151743  
38  
39  
40 445 33. Choi HG, Park B, Sim S, et al. Tonsillectomy Does Not Reduce Upper Respiratory  
41  
42 446 Infections: A National Cohort Study. *PLoS One* 2016;11(12):e0169264. doi:  
43  
44 447 10.1371/journal.pone.0169264  
45  
46  
47 448 34. Kim SY, Kim HJ, Park EK, et al. Severe hearing impairment and risk of depression: A  
48  
49 449 national cohort study. *PLoS One* 2017;12(6):e0179973. doi:  
50  
51 450 10.1371/journal.pone.0179973  
52  
53  
54  
55  
56  
57  
58  
59  
60

- 1  
2  
3 451 35. Kim MS, Kim SY, Kim JH, et al. Depression in breast cancer patients who have  
4  
5 452 undergone mastectomy: A national cohort study. *PLoS One* 2017;12(4):e0175395.  
6  
7 453 doi: 10.1371/journal.pone.0175395  
8  
9  
10 454 36. Kurth T, Diener HC. Current views of the risk of stroke for migraine with and migraine  
11  
12 455 without aura. *Curr Pain Headache Rep* 2006;10(3):214-20.  
13  
14 456 37. Bousser M-G, Welch KMA. Relation between migraine and stroke. *The Lancet*  
15  
16 457 *Neurology* 2005;4(9):533-42.  
17  
18  
19 458

20  
21  
22 459 **Figure legend**

23  
24 460 **Fig. 1** A schematic illustration of the participant selection process that was used in the present  
25  
26 461 study. Out of a total of 1,125,691 participants, 41,585 migraine participants were matched  
27  
28 462 with 166,340 control participants for age, group, sex, income group, region of residence, and  
29  
30 463 past medical histories.  
31  
32  
33 464

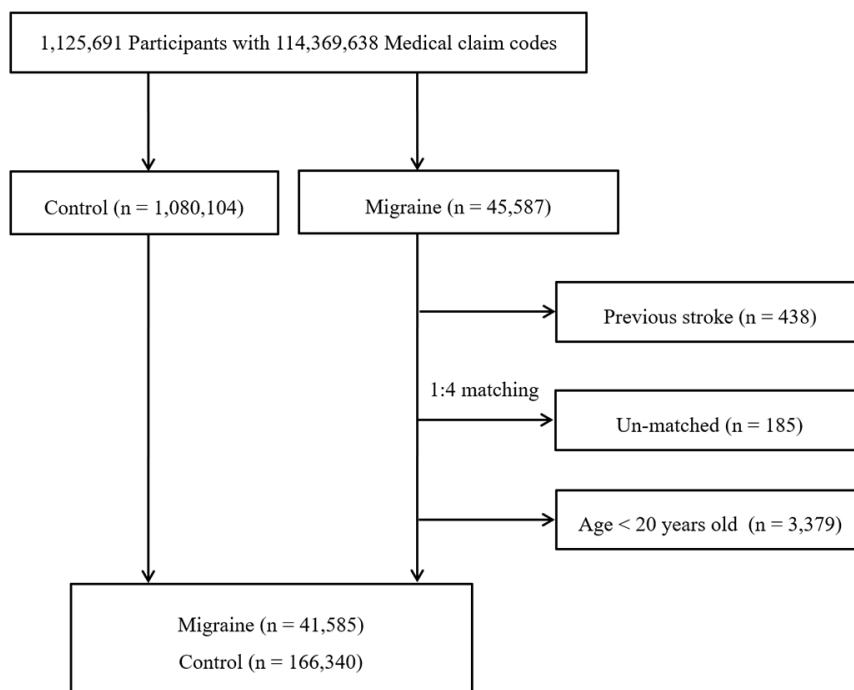

Fig.1

101x101mm (300 x 300 DPI)

# Reporting checklist for cohort study.

Based on the STROBE cohort guidelines.

## Instructions to authors

Complete this checklist by entering the page numbers from your manuscript where readers will find each of the items listed below.

Your article may not currently address all the items on the checklist. Please modify your text to include the missing information. If you are certain that an item does not apply, please write "n/a" and provide a short explanation.

Upload your completed checklist as an extra file when you submit to a journal.

In your methods section, say that you used the STROBE cohort reporting guidelines, and cite them as:

von Elm E, Altman DG, Egger M, Pocock SJ, Gøtzsche PC, Vandenbroucke JP. The Strengthening the Reporting of Observational Studies in Epidemiology (STROBE) Statement: guidelines for reporting observational studies.

|          |                     |                                                                                                 | Page   |
|----------|---------------------|-------------------------------------------------------------------------------------------------|--------|
|          |                     | Reporting Item                                                                                  | Number |
| Title    | <a href="#">#1a</a> | Indicate the study's design with a commonly used term in the title or the abstract              | 1      |
| Abstract | <a href="#">#1b</a> | Provide in the abstract an informative and balanced summary of what was done and what was found | 2      |

|                                                                      |                               |                     |                                                                                                                                                                                                                                                                      |     |
|----------------------------------------------------------------------|-------------------------------|---------------------|----------------------------------------------------------------------------------------------------------------------------------------------------------------------------------------------------------------------------------------------------------------------|-----|
| 1<br>2<br>3<br>4<br>5<br>6                                           | Background /<br>rationale     | <a href="#">#2</a>  | Explain the scientific background and rationale for the investigation being reported                                                                                                                                                                                 | 4-5 |
| 7<br>8<br>9<br>10<br>11                                              | Objectives                    | <a href="#">#3</a>  | State specific objectives, including any prespecified hypotheses                                                                                                                                                                                                     | 5   |
| 12<br>13<br>14                                                       | Study design                  | <a href="#">#4</a>  | Present key elements of study design early in the paper                                                                                                                                                                                                              | 5   |
| 15<br>16<br>17<br>18<br>19<br>20<br>21<br>22                         | Setting                       | <a href="#">#5</a>  | Describe the setting, locations, and relevant dates, including periods of recruitment, exposure, follow-up, and data collection                                                                                                                                      | 5-6 |
| 23<br>24<br>25<br>26<br>27                                           | Eligibility criteria          | <a href="#">#6a</a> | Give the eligibility criteria, and the sources and methods of selection of participants. Describe methods of follow-up.                                                                                                                                              | 6-7 |
| 28<br>29<br>30<br>31<br>32                                           |                               | <a href="#">#6b</a> | For matched studies, give matching criteria and number of exposed and unexposed                                                                                                                                                                                      | 6-7 |
| 33<br>34<br>35<br>36<br>37<br>38<br>39<br>40                         | Variables                     | <a href="#">#7</a>  | Clearly define all outcomes, exposures, predictors, potential confounders, and effect modifiers. Give diagnostic criteria, if applicable                                                                                                                             | 7-8 |
| 41<br>42<br>43<br>44<br>45<br>46<br>47<br>48<br>49<br>50<br>51<br>52 | Data sources /<br>measurement | <a href="#">#8</a>  | For each variable of interest give sources of data and details of methods of assessment (measurement). Describe comparability of assessment methods if there is more than one group. Give information separately for for exposed and unexposed groups if applicable. | 5-8 |
| 53<br>54<br>55                                                       | Bias                          | <a href="#">#9</a>  | Describe any efforts to address potential sources of bias                                                                                                                                                                                                            | 5-8 |
| 56<br>57<br>58<br>59<br>60                                           | Study size                    | <a href="#">#10</a> | Explain how the study size was arrived at                                                                                                                                                                                                                            | 7   |

|    |                        |                                                  |                                                                                                                                                                                                                   |                                                                                   |                                                                                                                                                                                                                                                                            |
|----|------------------------|--------------------------------------------------|-------------------------------------------------------------------------------------------------------------------------------------------------------------------------------------------------------------------|-----------------------------------------------------------------------------------|----------------------------------------------------------------------------------------------------------------------------------------------------------------------------------------------------------------------------------------------------------------------------|
| 1  | Quantitative variables | <a href="#">#11</a>                              | Explain how quantitative variables were handled in the analyses. If applicable, describe which groupings were chosen, and why                                                                                     | 7                                                                                 |                                                                                                                                                                                                                                                                            |
| 2  |                        | Statistical methods                              | <a href="#">#12a</a>                                                                                                                                                                                              | Describe all statistical methods, including those used to control for confounding | 8                                                                                                                                                                                                                                                                          |
| 3  |                        |                                                  | <a href="#">#12b</a>                                                                                                                                                                                              | Describe any methods used to examine subgroups and interactions                   | 8                                                                                                                                                                                                                                                                          |
| 4  |                        |                                                  | <a href="#">#12c</a>                                                                                                                                                                                              | Explain how missing data were addressed                                           | NA                                                                                                                                                                                                                                                                         |
| 5  |                        |                                                  | <a href="#">#12d</a>                                                                                                                                                                                              | If applicable, explain how loss to follow-up was addressed                        | NA                                                                                                                                                                                                                                                                         |
| 6  |                        |                                                  | <a href="#">#12e</a>                                                                                                                                                                                              | Describe any sensitivity analyses                                                 | NA                                                                                                                                                                                                                                                                         |
| 7  |                        |                                                  | Participants                                                                                                                                                                                                      | <a href="#">#13a</a>                                                              | Report numbers of individuals at each stage of study—eg numbers potentially eligible, examined for eligibility, confirmed eligible, included in the study, completing follow-up, and analysed. Give information separately for exposed and unexposed groups if applicable. |
| 8  | <a href="#">#13b</a>   | Give reasons for non-participation at each stage |                                                                                                                                                                                                                   | NA                                                                                |                                                                                                                                                                                                                                                                            |
| 9  | <a href="#">#13c</a>   | Consider use of a flow diagram                   |                                                                                                                                                                                                                   | 7                                                                                 |                                                                                                                                                                                                                                                                            |
| 10 | Descriptive data       | <a href="#">#14a</a>                             | Give characteristics of study participants (eg demographic, clinical, social) and information on exposures and potential confounders. Give information separately for exposed and unexposed groups if applicable. | 8-13                                                                              |                                                                                                                                                                                                                                                                            |
| 11 |                        |                                                  |                                                                                                                                                                                                                   |                                                                                   |                                                                                                                                                                                                                                                                            |
| 12 |                        |                                                  |                                                                                                                                                                                                                   |                                                                                   |                                                                                                                                                                                                                                                                            |
| 13 |                        |                                                  |                                                                                                                                                                                                                   |                                                                                   |                                                                                                                                                                                                                                                                            |

|    |                |                      |                                                                   |       |
|----|----------------|----------------------|-------------------------------------------------------------------|-------|
| 1  |                | <a href="#">#14b</a> | Indicate number of participants with missing data for each        | 8-13  |
| 2  |                |                      | variable of interest                                              |       |
| 3  |                |                      |                                                                   |       |
| 4  |                |                      |                                                                   |       |
| 5  |                |                      |                                                                   |       |
| 6  |                | <a href="#">#14c</a> | Summarise follow-up time (eg, average and total amount)           | 8     |
| 7  |                |                      |                                                                   |       |
| 8  |                |                      |                                                                   |       |
| 9  |                |                      |                                                                   |       |
| 10 | Outcome data   | <a href="#">#15</a>  | Report numbers of outcome events or summary measures              | NA    |
| 11 |                |                      | over time. Give information separately for exposed and            |       |
| 12 |                |                      | unexposed groups if applicable.                                   |       |
| 13 |                |                      |                                                                   |       |
| 14 |                |                      |                                                                   |       |
| 15 |                |                      |                                                                   |       |
| 16 |                |                      |                                                                   |       |
| 17 | Main results   | <a href="#">#16a</a> | Give unadjusted estimates and, if applicable, confounder-         | 8-13  |
| 18 |                |                      | adjusted estimates and their precision (eg, 95% confidence        |       |
| 19 |                |                      | interval). Make clear which confounders were adjusted for         |       |
| 20 |                |                      | and why they were included                                        |       |
| 21 |                |                      |                                                                   |       |
| 22 |                |                      |                                                                   |       |
| 23 |                |                      |                                                                   |       |
| 24 |                |                      |                                                                   |       |
| 25 |                |                      |                                                                   |       |
| 26 |                |                      |                                                                   |       |
| 27 |                | <a href="#">#16b</a> | Report category boundaries when continuous variables were         | NA    |
| 28 |                |                      | categorized                                                       |       |
| 29 |                |                      |                                                                   |       |
| 30 |                |                      |                                                                   |       |
| 31 |                |                      |                                                                   |       |
| 32 |                |                      |                                                                   |       |
| 33 |                | <a href="#">#16c</a> | If relevant, consider translating estimates of relative risk into | NA    |
| 34 |                |                      | absolute risk for a meaningful time period                        |       |
| 35 |                |                      |                                                                   |       |
| 36 |                |                      |                                                                   |       |
| 37 |                |                      |                                                                   |       |
| 38 | Other analyses | <a href="#">#17</a>  | Report other analyses done—e.g., analyses of subgroups            | 13-14 |
| 39 |                |                      | and interactions, and sensitivity analyses                        |       |
| 40 |                |                      |                                                                   |       |
| 41 |                |                      |                                                                   |       |
| 42 |                |                      |                                                                   |       |
| 43 | Key results    | <a href="#">#18</a>  | Summarise key results with reference to study objectives          | 16    |
| 44 |                |                      |                                                                   |       |
| 45 |                |                      |                                                                   |       |
| 46 | Limitations    | <a href="#">#19</a>  | Discuss limitations of the study, taking into account sources     |       |
| 47 |                |                      | of potential bias or imprecision. Discuss both direction and      |       |
| 48 |                |                      | magnitude of any potential bias.                                  |       |
| 49 |                |                      |                                                                   |       |
| 50 |                |                      |                                                                   |       |
| 51 |                |                      |                                                                   |       |
| 52 |                |                      |                                                                   |       |
| 53 |                |                      |                                                                   |       |
| 54 |                |                      |                                                                   |       |
| 55 |                |                      |                                                                   |       |
| 56 |                |                      |                                                                   |       |
| 57 |                |                      |                                                                   |       |
| 58 |                |                      |                                                                   |       |
| 59 |                |                      |                                                                   |       |
| 60 |                |                      |                                                                   |       |



|    |                  |                     |                                                                |       |
|----|------------------|---------------------|----------------------------------------------------------------|-------|
| 1  | Interpretation   | <a href="#">#20</a> | Give a cautious overall interpretation considering objectives, | 19    |
| 2  |                  |                     | limitations, multiplicity of analyses, results from similar    |       |
| 3  |                  |                     | studies, and other relevant evidence.                          |       |
| 4  |                  |                     |                                                                |       |
| 5  |                  |                     |                                                                |       |
| 6  |                  |                     |                                                                |       |
| 7  |                  |                     |                                                                |       |
| 8  | Generalisability | <a href="#">#21</a> | Discuss the generalisability (external validity) of the study  | 16-18 |
| 9  |                  |                     | results                                                        |       |
| 10 |                  |                     |                                                                |       |
| 11 |                  |                     |                                                                |       |
| 12 |                  |                     |                                                                |       |
| 13 |                  |                     |                                                                |       |
| 14 | Funding          | <a href="#">#22</a> | Give the source of funding and the role of the funders for the | 20    |
| 15 |                  |                     | present study and, if applicable, for the original study on    |       |
| 16 |                  |                     | which the present article is based                             |       |
| 17 |                  |                     |                                                                |       |
| 18 |                  |                     |                                                                |       |
| 19 |                  |                     |                                                                |       |
| 20 |                  |                     |                                                                |       |
| 21 |                  |                     |                                                                |       |

22 The STROBE checklist is distributed under the terms of the Creative Commons Attribution License  
23 CC-BY. This checklist can be completed online using <https://www.goodreports.org/>, a tool made by  
24 the [EQUATOR Network](#) in collaboration with [Penelope.ai](#)  
25  
26  
27  
28  
29  
30  
31  
32  
33  
34  
35  
36  
37  
38  
39  
40  
41  
42  
43  
44  
45  
46  
47  
48  
49  
50  
51  
52  
53  
54  
55  
56  
57  
58  
59  
60

# BMJ Open

## Increased risk of ischemic stroke in patients with migraine: A longitudinal follow-up study using a national sample cohort in Korea

|                                 |                                                                                                                                                                                                                                                                                                                                                                    |
|---------------------------------|--------------------------------------------------------------------------------------------------------------------------------------------------------------------------------------------------------------------------------------------------------------------------------------------------------------------------------------------------------------------|
| Journal:                        | <i>BMJ Open</i>                                                                                                                                                                                                                                                                                                                                                    |
| Manuscript ID                   | bmjopen-2018-027701.R1                                                                                                                                                                                                                                                                                                                                             |
| Article Type:                   | Research                                                                                                                                                                                                                                                                                                                                                           |
| Date Submitted by the Author:   | 23-Jan-2019                                                                                                                                                                                                                                                                                                                                                        |
| Complete List of Authors:       | Lee, Sang-Yeon; Seoul National University Hospital, Otorhinolaryngology-Head and Neck Surgery<br>Lim, Jae-Sung; Hallym University Sacred Heart Hospital, Neurology<br>Oh, Dong Jun; Asan Medical Center, University of Ulsan College of Medicine<br>Kong, Il Gyu; Hallym University College of Medicine, Otorhinolaryngology<br>Choi, Hyo Geun; Hallym University, |
| <b>Primary Subject Heading</b>: | Neurology                                                                                                                                                                                                                                                                                                                                                          |
| Secondary Subject Heading:      | Epidemiology, Neurology, Ear, nose and throat/otolaryngology                                                                                                                                                                                                                                                                                                       |
| Keywords:                       | EPIDEMIOLOGY, Migraine < NEUROLOGY, Stroke < NEUROLOGY                                                                                                                                                                                                                                                                                                             |
|                                 |                                                                                                                                                                                                                                                                                                                                                                    |

SCHOLARONE™  
Manuscripts

1  
2  
3  
4 1 **Increased risk of ischemic stroke in patients with**  
5  
6  
7 2 **migraine: A longitudinal follow-up study using a national**  
8  
9  
10 3 **sample cohort in Korea**  
11  
12  
13  
14 4

15  
16 5 Sang-Yeon Lee<sup>1</sup>, Jae-Sung Lim<sup>2</sup>, Dong Jun Oh<sup>3</sup>, Il Gyu Kong<sup>4</sup>, Hyo Geun Choi<sup>4\*</sup>  
17  
18 6

19  
20 7 <sup>1</sup>Department of Otorhinolaryngology-Head and Neck Surgery, Seoul National University  
21  
22 8 Hospital, Seoul National University College of Medicine, Seoul, South Korea  
23  
24

25 9 <sup>2</sup>Department of Neurology, Hallym University College of Medicine, Anyang, Korea  
26

27 10 <sup>3</sup>Department of Internal Medicine, Asan Medical Center, University of Ulsan College of  
28  
29 11 Medicine, Seoul  
30

31 12 <sup>4</sup>Department of Laboratory Medicine, Hallym University College of Medicine, Anyang,  
32  
33 13 Korea  
34  
35

36 14  
37  
38 15 Corresponding author: Hyo Geun Choi  
39

40  
41 16 Department of Otorhinolaryngology-Head & Neck Surgery, Hallym University Sacred Heart  
42  
43 17 Hospital, 22, Gwanpyeong-ro 170beon-gil, Dongan-gu, Anyang-si, Gyeonggi-do, 14068  
44

45 18 Republic of Korea  
46

47 19 Tel: 82-31-380-3849  
48

49 20 Fax: 82-31-386-3860  
50

51 21 Email: [pupen@naver.com](mailto:pupen@naver.com)  
52  
53  
54  
55 22

56  
57 23 Word Count: 3226  
58  
59  
60

1  
2  
3 **24 Abstract**  
4

5 **25 Objective:** Accumulating evidence has supported the association between migraine and  
6  
7  
8 **26** stroke, but the causative association remains unclear. We aimed to investigate the risks of  
9  
10  
11 **27** different types of stroke in patients with migraine.

12 **28 Design:** A longitudinal follow-up study

13  
14 **29 Setting:** Data collected from a national cohort between 2002 and 2013 by the Korean Health  
15  
16  
17 **30** Insurance Review and Assessment

18  
19 **31 Participants:** We extracted the data from patients with migraine (n = 41,585) and 1:4  
20  
21  
22 **32** matched controls (n = 166,340) and analyzed the occurrence of ischemic and hemorrhagic  
23  
24 **33** strokes. The migraine group included participants treated for migraine (ICD-10: G43)  $\geq$  2  
25  
26 **34** times. Hemorrhagic stroke (I60-I62) and ischemic stroke (I63) were determined based on the  
27  
28 **35** admission histories. The crude and adjusted hazard ratios (HRs) were calculated using Cox  
29  
30 **36** proportional hazard models, and the 95% confidence intervals (CIs) were determined.  
31  
32  
33 **37** Subgroup analyses stratified by age and sex were also performed.

34  
35 **38 Results:** Higher rates of ischemic stroke were observed in the migraine group (2.3%  
36  
37  
38 [964/41,585]) than in the control group (2.0% [3,294/166,340],  $P < 0.001$ ). The adjusted HR  
39  
40 **40** for ischemic stroke was 1.18 (95% CI = 1.10-1.26) in the migraine group ( $P < 0.001$ ).  
41  
42 **41** Compared with control subjects, participants who reported migraine with aura and migraine  
43  
44 **42** without aura had increased adjusted HRs of 1.44 (95% CI = 1.09-1.89) and 1.15 (95% CI =  
45  
46 **43** 1.06-1.24), respectively, for ischemic stroke, but no increased risk of hemorrhagic stroke. In  
47  
48 **44** our subgroup analysis, a strong association between migraine and ischemic stroke was  
49  
50 **45** observed in young patients, specifically young women. The contribution of migraine to the  
51  
52  
53 **46** occurrence of ischemic stroke was also observed in middle-aged women and old women  
54  
55  
56  
57  
58  
59  
60

1  
2  
3 47 (each  $P < 0.05$ ). The risk of hemorrhagic stroke did not reach statistical significance in any  
4  
5 48 age group.

6  
7  
8 49 **Conclusion:** Migraine is associated with an increased risk of ischemic stroke, but not  
9  
10 50 hemorrhagic stroke.

11  
12 51 Keywords: migraine, stroke, cohort study, Korea  
13  
14  
15 52

### 16 17 53 **STRENGTHS AND LIMITATIONS OF THIS STUDY**

18  
19 54 1. The strengths of the present study particularly result from the large cohort based on a  
20  
21 55 complete, national patient sample and the long follow-up period.

22  
23  
24 56 2. We designed a cohort study to evaluate the risks of different types of stroke in migraineurs.

25  
26 57 3. Migraine should be considered in assessments of the risk of ischemic stroke, particularly in  
27  
28 58 young women.

29  
30 59 4. Confounders linking migraine to stroke, such as cigarette smoking, obesity, and  
31  
32 60 prescription information, were not available in the present cohort study based on claim data.

33  
34  
35 61

### 36 37 62 **Introduction**

38  
39  
40 63 Migraine is a common neurovascular disorder characterized by recurrent disabling episodes  
41  
42 64 of headache, most often unilateral headache. The headache is often accompanied by visual or  
43  
44 65 sensory symptoms, namely, aura.<sup>1</sup> The annual prevalence of migraine is approximately 8–  
45  
46 66 15% worldwide,<sup>2,3</sup> and in Korea, the estimated incidence is 6.1%.<sup>4</sup> Migraine appears to  
47  
48 67 present at a relatively young age ( $< 45$  years); it is more prevalent in women than men, with a  
49  
50 68 prevalence  $> 25\%$  in the 35–39-year-old female population worldwide.<sup>1</sup> The inclusion of  
51  
52 69 migraine as an independent risk factor for cardiovascular events has been debated for many  
53  
54 70 years, but it is an established risk factor for ischemic stroke.<sup>5</sup>

1  
2  
3 71 Stroke is a cerebrovascular condition characterized by limited blood flow to the brain due  
4  
5 72 to a blockage or rupture in the cerebrovascular system.<sup>6</sup> Stroke is responsible for  
6  
7 73 approximately 700,000 deaths annually in the Western world.<sup>7</sup> In Korea, the estimated stroke  
8  
9 74 incidence is approximately 795,000 in people aged  $\geq 30$  years.<sup>8</sup> More than 80% of stroke  
10  
11 75 cases are ischemic stroke, and the remaining cases are hemorrhagic stroke; ischemic and  
12  
13 76 hemorrhagic strokes differ with regard to risk factors, genetic predisposition, and mortality  
14  
15 77 rates.<sup>9 10</sup>

16  
17  
18  
19 78 To date, several underlying physiological mechanisms have been suggested to explain the  
20  
21 79 association between migraine and stroke. The risk factors for stroke in migraineurs have been  
22  
23 80 widely evaluated, and common comorbidities, including hypertension, obesity, dyslipidemia,  
24  
25 81 and smoking, were validated.<sup>11</sup> In addition, specific genetic etiologies associated with  
26  
27 82 vasculopathy can manifest in both patients suffering from migraine and stroke.<sup>12</sup> A recent  
28  
29 83 investigation employing a mutant mouse model of migraine also indicated that shared genetic  
30  
31 84 risk factors rendered the brain more vulnerable to ischemic stroke.<sup>13</sup>

32  
33  
34  
35 85 Moreover, migraine itself carries an increased risk of ischemic stroke. Migraine is  
36  
37 86 associated with an increased risk of perioperative ischemic stroke in a large cohort of surgical  
38  
39 87 patients, suggesting that migraine should be included in the perioperative risk assessment.<sup>14</sup>  
40  
41 88 Recently, a population-based case-control study in Taiwan reported an association between  
42  
43 89 migraine and ischemic stroke (adjusted hazard ratio [HR]: 1.24, confidence interval [CI]:  
44  
45 90 1.12–1.38).<sup>3</sup> Similarly, an increased risk of ischemic stroke has been consistently observed in  
46  
47 91 migraineurs, especially in those diagnosed with migraine with aura.<sup>3 15-18</sup> Furthermore,  
48  
49 92 accumulating evidence has supported the association between migraine and hemorrhagic  
50  
51 93 stroke,<sup>19 20</sup> but the causative association currently remains unclear.

1  
2  
3 94 Given the differences in the natures of hemorrhagic stroke and ischemic stroke in  
4  
5 95 patients, including risk factors and genetic predispositions,<sup>9 10</sup> we hypothesized that the  
6  
7  
8 96 contributions of migraine to an increased risk of stroke differ according to the stroke type.  
9  
10 97 Thus, stroke types should be analyzed separately. Additionally, stroke is a leading cause of  
11  
12 98 mortality; therefore, validation of the association between migraine and stroke may facilitate  
13  
14 99 treatment and prognosis in these cases. Here, using a national Korean population-based  
15  
16  
17 100 sample cohort, we examined the associations between migraine and different types of stroke.  
18  
19  
20 101

## 21 102 **Materials and Methods**

### 22 103 **Study population and data collection**

23  
24  
25  
26 104 The ethics committee of Hallym University (2014-I148) approved the use of these data. The  
27  
28 105 Institutional Review Board exempted the requirement for written informed consent.

29  
30 106 This national cohort study used data from the Korean National Health Insurance  
31  
32  
33 107 Service-National Sample Cohort (NHIS-NSC). The Korean NHIS selects samples directly  
34  
35 108 from the entire population database to prevent nonsampling errors. Approximately 2% of the  
36  
37 109 samples (one million) were selected from the entire Korean population (50 million). The  
38  
39 110 selected data were classified into 1,476 levels (age [18 categories], sex [2 categories], and  
40  
41 111 income level [41 categories]) using randomized, stratified, systematic sampling methods via  
42  
43 112 proportional allocation to represent the entire population. A previous study verified the  
44  
45 113 appropriateness of the sample after data selection.<sup>21</sup> The National Health Insurance Sharing  
46  
47 114 Service provides a detailed description of the methods used to perform these procedures.<sup>22</sup>  
48  
49 115 This cohort database included (i) personal information, (ii) health insurance claim codes  
50  
51  
52 116 (procedures and prescriptions), (iii) diagnostic codes based on the International Classification  
53  
54  
55 117 of Disease-10 (ICD-10), (iv) death records from the Korean National Statistical Office (using  
56  
57  
58  
59  
60

1  
2  
3 118 the Korean Standard Classification of disease), (v) socioeconomic data (residence and  
4  
5 119 income), and (vi) medical examination data for each participant from 2002 to 2013.

6  
7 120 All Korean citizens are recognized by a 13-digit resident registration number from birth  
8  
9 121 to death. Therefore, exact population statistics have been determined using this database. All  
10  
11 122 Koreans are required to enroll in the NHIS. All Korean hospitals and clinics use the 13-digit  
12  
13 123 resident registration number to register individual patients in the medical insurance system.  
14  
15 124 Therefore, the risk of overlapping medical records is minimal, even if a patient moves from  
16  
17 125 one place to another. All medical treatments in Korea are tracked without exception using the  
18  
19 126 Health Insurance Review & Assessment (HIRA) system. In Korea, the law states that a notice  
20  
21 127 of death must be provided to an administrative entity before a funeral can be held. Medical  
22  
23 128 doctors record the date and cause of death on a death certificate.  
24  
25  
26  
27  
28  
29

### 30 130 **Patients and public involvement**

31 131 No patients or public were involved in the present study.

32  
33  
34  
35 132

### 36 133 **Participant Selection**

37  
38 134 Of the 1,125,691 patients with 114,369,638 medical claim codes, participants diagnosed with  
39  
40 135 migraine (ICD-10: G43) were included. Among these participants, those who were treated  $\geq$   
41  
42 136 2 times ( $n = 45,587$ ) were selected. The participants were followed for 12 years.

43  
44  
45 137 The history of admission for hemorrhagic stroke (I60: Subarachnoid hemorrhage, I61:  
46  
47 138 Intracerebral hemorrhage, and I62: Other nontraumatic intracranial hemorrhage) and  
48  
49 139 ischemic stroke (I63: Cerebral infarction) was identified using ICD-10 codes. We selected the  
50  
51 140 participants who were treated  $\geq 1$  time. These methods were used in other studies evaluating  
52  
53 141 the incidence of stroke in Korea.<sup>8 23</sup>  
54  
55  
56  
57  
58  
59  
60



1  
2  
3 142 The participants with migraine were matched 1:4 with participants (control group) who  
4  
5 143 had never been diagnosed with a migraine from 2002 through 2013 in this cohort. The control  
6  
7 144 group was selected from the total population (n = 1,080,104). The matches were processed  
8  
9  
10 145 for age, group, sex, income group, region of residence, and past medical histories (age, sex,  
11  
12 146 income, region of residence, hypertension, diabetes, and dyslipidemia histories). We sorted  
13  
14 147 the participants in the control group using a random number order and then selected them  
15  
16  
17 148 from top to bottom to prevent selection bias when selecting the matched control participants.  
18  
19 149 We assumed that the matched control participants were enrolled at the same time as each  
20  
21 150 matched participant with migraine (index date). Therefore, control group members who died  
22  
23 151 before the index date were excluded. In both the migraine and control groups, participants  
24  
25 152 with histories of hemorrhagic or ischemic stroke before the index date were excluded. In the  
26  
27 153 migraine group, 438 participants were excluded. The participants with migraine for whom we  
28  
29 154 were unable to identify sufficient numbers of matching participants were excluded (n = 185).  
30  
31 155 We excluded participants aged less than 20 years (n = 3,379). Finally, 1:4 matching resulted  
32  
33 156 in the inclusion of 41,585 participants with migraine (migraine with aura = 3,458, migraine  
34  
35 157 without aura = 38,127) and 166,340 control participants (Fig. 1).  
36  
37  
38  
39  
40  
41

158

## 159 **Variables**

160 The age groups were classified using 5-year intervals: 20-24, 25-29, 30-34..., and 85+ years  
161 old. Fourteen age groups were designated. The income groups were initially divided into 41  
162 classes (one health aid class, 20 self-employment health insurance classes, and 20  
163 employment health insurance classes). These groups were recategorized into 11 classes (class  
164 1 [lowest income]–class 11 [highest income]). The region of residence was divided into 16  
165 areas according to administrative district. These regions were regrouped into urban (Seoul,

1  
2  
3 166 Busan, Daegu, Incheon, Gwangju, Daejeon, and Ulsan) and rural (Gyeonggi, Gangwon,  
4  
5 167 Chungcheongbuk, Chungcheongnam, Jeollabuk, Jeollanam, Gyeongsangbuk,  
6  
7 168 Gyeongsangnam, and Jeju) areas. The past medical histories of the participants were  
8  
9  
10 169 evaluated using ICD-10 codes. For an accurate diagnosis, hypertension (I10 and I15),  
11  
12 170 diabetes (E10-E14), and dyslipidemia (E78) were recorded if the participants were treated  $\geq 2$   
13  
14 171 times. Moreover, we further included variables including congestive heart failure, myocardial  
15  
16 172 infarction, peripheral vascular disease, pulmonary disease, liver disease, and depression  
17  
18 173 histories that might affect the association between migraine and stroke using the Charlson  
19  
20 174 Comorbidity Index and subsequently performed the analysis with the added variables.  
21  
22  
23  
24  
25

## 26 176 **Statistical Analyses**

27  
28 177 Chi-square tests were used to compare the general characteristics between the migraine and  
29  
30 178 control groups. For the analysis of the HRs of migraine for hemorrhagic stroke and ischemic  
31  
32 179 stroke, Cox proportional hazard models were used, and 95% CIs were calculated. In these  
33  
34 180 analyses, crude (simple) and adjusted (age, sex, income, region of residence, hypertension,  
35  
36 181 diabetes, dyslipidemia, congestive heart failure, myocardial infarction, peripheral vascular  
37  
38 182 disease, pulmonary disease, liver disease, and depression histories) models were used. For the  
39  
40 183 subgroup analysis, we stratified the participants by age and sex (20–39 years old, 40–59 years  
41  
42 184 old, 60+ years old; men and women). Two-tailed analyses were conducted, and P values less  
43  
44 185 than 0.05 were considered significant. The results were statistically analyzed using SPSS v.  
45  
46 186 21.0 software (IBM, Armonk, NY, USA).  
47  
48  
49  
50

51 187  
52  
53  
54  
55  
56  
57  
58  
59  
60

1  
2  
3 **188 Results**  
4

5 189 The mean follow-up period was 80.9 (standard deviation [SD] = 41.6) months for patients  
6  
7 190 with migraine and 80.9 (SD = 41.6) months for controls. The rates of hemorrhagic stroke  
8  
9 191 were similar in the migraine group (0.7% [295/41,585]) and the control group (0.7%  
10  
11 [1,113/166,340], P = 0.370, Table 1). Higher rates of ischemic stroke were observed in the  
12  
13 192 migraine group (2.3% [964/41,585]) than in the control group (2.0% [3,294/166,340], P <  
14  
15 193 0.001). The general characteristics (age, sex, income, region of residence, hypertension,  
16  
17 194 diabetes, and dyslipidemia histories) of participants were the same due to the matching  
18  
19 195 protocol (P = 1.000).  
20  
21 196  
22  
23  
24 197  
25

26 **198 Table 1** General characteristics of the participants  
27

| Characteristics | Total participants |                |         |
|-----------------|--------------------|----------------|---------|
|                 | Migraine (n, %)    | Control (n, %) | P-value |
| Age (years)     |                    |                | 1.000   |
| 20-24           | 1,994 (4.8)        | 7,976 (4.8)    |         |
| 25-29           | 2,649 (6.4)        | 10,596 (6.4)   |         |
| 30-34           | 3,640 (8.8)        | 14,560 (8.8)   |         |
| 35-39           | 4,309 (10.4)       | 17,236 (10.4)  |         |
| 40-44           | 4,859 (11.7)       | 19,436 (11.7)  |         |
| 45-49           | 5,187 (12.5)       | 20,748 (12.5)  |         |
| 50-54           | 4,512 (10.9)       | 18,048 (10.9)  |         |
| 55-59           | 3,508 (8.4)        | 14,032 (8.4)   |         |
| 60-64           | 3,209 (7.7)        | 12,836 (7.7)   |         |
| 65-69           | 3,049 (7.3)        | 12,196 (7.3)   |         |

|                     |               |                |       |
|---------------------|---------------|----------------|-------|
| 70-74               | 2,328 (5.6)   | 9,312 (5.6)    |       |
| 75-79               | 1,423 (3.4)   | 5,692 (3.4)    |       |
| 80-84               | 651 (1.6)     | 2,604 (1.6)    |       |
| 85+                 | 267 (0.6)     | 1,068 (0.6)    |       |
| Sex                 |               |                | 1.000 |
| Male                | 10,476 (25.2) | 41,904 (25.2)  |       |
| Female              | 31,109 (74.8) | 124,436 (74.8) |       |
| Income              |               |                | 1.000 |
| 1 (lowest)          | 837 (2.0)     | 3,348 (2.0)    |       |
| 2                   | 3,170 (7.6)   | 12,680 (7.6)   |       |
| 3                   | 3,004 (7.2)   | 12,016 (7.2)   |       |
| 4                   | 3,131 (7.5)   | 12,524 (7.5)   |       |
| 5                   | 3,345 (8.0)   | 13,380 (8.0)   |       |
| 6                   | 3,615 (8.7)   | 14,460 (8.7)   |       |
| 7                   | 3,908 (9.4)   | 15,632 (9.4)   |       |
| 8                   | 4,411 (10.6)  | 17,644 (10.6)  |       |
| 9                   | 4,908 (11.8)  | 19,632 (11.8)  |       |
| 10                  | 5,456 (13.1)  | 21,824 (13.1)  |       |
| 11 (highest)        | 5,800 (13.9)  | 23,200 (13.9)  |       |
| Region of residence |               |                | 1.000 |
| Urban               | 17,959 (43.2) | 71,836 (43.2)  |       |
| Rural               | 23,626 (56.8) | 94,504 (56.8)  |       |
| Hypertension        | 16,209 (39.0) | 64,836 (39.0)  | 1.000 |
| Diabetes            | 7,261 (17.5)  | 29,044 (17.5)  | 1.000 |

|                             |               |               |          |
|-----------------------------|---------------|---------------|----------|
| Dyslipidemia                | 12,837 (30.9) | 51,348 (30.9) | 1.000    |
| Congestive heart failure    | 2,030 (4.9)   | 6,761 (4.1)   | < 0.001* |
| Myocardial infarction       | 913 (2.2)     | 3,330 (2.0)   | 0.013*   |
| Peripheral vascular disease | 7,942 (19.1)  | 20,217 (12.2) | < 0.001* |
| Pulmonary disease           | 29,540 (71.0) | 94,811 (57.0) | < 0.001* |
| Liver disease               | 5,087 (12.2)  | 15,317 (9.2)  | < 0.001* |
| Depression                  | 7,808 (18.8)  | 15,269 (9.2)  | < 0.001* |
| Hemorrhagic stroke          | 295 (0.7)     | 1,113 (0.7)   | 0.370    |
| Ischemic stroke             | 964 (2.3)     | 3,294 (2.0)   | < 0.001* |

199

200 \*Chi-square test. Differences were considered significant at  $P < 0.05$ .

201

202 The crude and adjusted HRs for hemorrhagic stroke were 1.06 (95% CI = 0.93–1.21,  $P =$   
 203 0.369) and 1.10 (95% CI = 0.96–1.25,  $P = 0.172$ ), respectively, in the migraine group (Table  
 204 2). The crude and adjusted HRs for ischemic stroke were 1.17 (95% CI = 1.09–1.26) and 1.18  
 205 (95% CI = 1.08–1.25), respectively, in the migraine group (each  $P < 0.001$ ).

206

207

208

209 **Table 2** Crude and adjusted hazard ratios (95% confidence interval) of migraine for hemorrhagic stroke and ischemic stroke

| Characteristics | Hemorrhagic stroke |         |                  |         | Ischemic stroke  |          |                  |          |
|-----------------|--------------------|---------|------------------|---------|------------------|----------|------------------|----------|
|                 | Crude              | P-value | Adjusted†        | P-value | Crude            | P-value  | Adjusted†        | P-value  |
| Migraine        |                    | 0.369   |                  | 0.172   |                  | < 0.001* |                  | < 0.001* |
| Yes             | 1.06 (0.93-1.21)   |         | 1.10 (0.96-1.25) |         | 1.17 (1.09-1.26) |          | 1.17 (1.08-1.25) |          |
| No              | 1.00               |         | 1.00             |         | 1.00             |          | 1.00             |          |

210  
211 \* Cox proportional hazard regression model; differences were considered significant at  $P < 0.05$ .

212 † Model adjusted for age, sex, income, region of residence, hypertension, diabetes, dyslipidemia, congestive heart failure, myocardial infarction,  
213 peripheral vascular disease, pulmonary disease, liver disease, and depression histories.

1  
2  
3 214 In the subgroup analyses, none of the crude and adjusted HRs for hemorrhagic stroke  
4  
5 215 reached statistical significance (Table 3). Among the patients with ischemic stroke, young  
6  
7 216 women, middle-aged women, and old women showed statistically significant differences  
8  
9 217 (each  $P < 0.05$ ). The significant adjusted HRs were 2.31 (95% CI = 1.39–3.82) in young  
10  
11 218 women (20-39 years old); 1.32 (95% CI = 1.08–1.61) in middle-aged women (40-59 years  
12  
13 219 old); and 1.18 (95% CI = 1.06–1.30) in  $\geq 60$ -year-old women. Moreover, descriptive  
14  
15 220 statistical analyses of the migraine prevalence and ischemic stroke occurrence within  
16  
17 221 subgroups revealed statistically significant differences in young men, young women, middle-  
18  
19 222 aged women, old men, and old women. On the other hand, the risk of hemorrhagic stroke in  
20  
21 223 patients with migraine was not significantly different from the control group (Supplement  
22  
23  
24 224 table 1).  
25  
26  
27  
28  
29  
30  
31  
32  
33  
34  
35  
36  
37  
38  
39  
40  
41  
42  
43  
44  
45  
46  
47  
48  
49  
50  
51  
52  
53  
54  
55  
56  
57  
58  
59  
60

234 **Table 3** Subgroup analysis of crude and adjusted hazard ratios (95% confidence interval) of migraine for hemorrhagic stroke and ischemic  
 235 stroke

| Characteristics                                      | Hemorrhagic stroke |         |                  |         | Ischemic stroke  |          |                  |         |
|------------------------------------------------------|--------------------|---------|------------------|---------|------------------|----------|------------------|---------|
|                                                      | Crude              | P-value | Adjusted†        | P-value | Crude            | P-value  | Adjusted†        | P-value |
| <b>Young men (20-39 years old, n = 15,550)</b>       |                    |         |                  |         |                  |          |                  |         |
| Migraine                                             |                    | 0.158   |                  | 0.330   |                  | 0.017*   |                  | 0.107   |
| Yes                                                  | 1.56 (0.84-2.89)   |         | 1.37 (0.73-2.59) |         | 2.15 (1.15-4.02) |          | 1.72 (0.89-3.32) |         |
| No                                                   | 1.00               |         | 1.00             |         | 1.00             |          | 1.00             |         |
| <b>Young women (20-39 years old, n = 47,410)</b>     |                    |         |                  |         |                  |          |                  |         |
| Migraine                                             |                    | 0.726   |                  | 0.879   |                  | < 0.001* |                  | 0.001*  |
| Yes                                                  | 1.10 (0.64-1.92)   |         | 1.05 (0.59-1.84) |         | 2.54 (1.55-4.15) |          | 2.31 (1.39-3.82) |         |
| No                                                   | 1.00               |         | 1.00             |         | 1.00             |          | 1.00             |         |
| <b>Middle-aged men (40-59 years old, n = 22,090)</b> |                    |         |                  |         |                  |          |                  |         |
| Migraine                                             |                    | 0.721   |                  | 0.668   |                  | 0.565    |                  | 0.418   |
| Yes                                                  | 1.07 (0.73-1.56)   |         | 1.09 (0.74-1.61) |         | 0.93 (0.71-1.21) |          | 0.89 (0.68-1.17) |         |



|                                                        |                  |                  |                  |                  |
|--------------------------------------------------------|------------------|------------------|------------------|------------------|
| No                                                     | 1.00             | 1.00             | 1.00             | 1.00             |
| <b>Middle-aged women (40-59 years old, n = 68,240)</b> |                  |                  |                  |                  |
| Migraine                                               | 0.582            | 0.388            | 0.002*           | 0.006*           |
| Yes                                                    | 1.07 (0.84-1.38) | 1.12 (0.87-1.44) | 1.35 (1.12-1.64) | 1.32 (1.08-1.61) |
| No                                                     | 1.00             | 1.00             | 1.00             | 1.00             |
| <b>Old men (≥ 60 years old, n = 14,740)</b>            |                  |                  |                  |                  |
| Migraine                                               | 0.115            | 0.068            | 0.275            | 0.353            |
| Yes                                                    | 1.29 (0.94-1.78) | 1.36 (0.98-1.88) | 1.09 (0.93-1.27) | 1.08 (0.92-1.26) |
| No                                                     | 1.00             | 1.00             | 1.00             | 1.00             |
| <b>Old women (≥ 60 years old, n = 39,895)</b>          |                  |                  |                  |                  |
| Migraine                                               | 0.462            | 0.757            | 0.002*           | 0.002*           |
| Yes                                                    | 0.92 (0.75-1.14) | 0.97 (0.78-1.20) | 1.17 (1.06-1.29) | 1.18 (1.06-1.30) |
| No                                                     | 1.00             | 1.00             | 1.00             | 1.00             |

236

237 \* Cox proportional hazard regression model; differences were considered significant at P &lt; 0.05.

1  
2  
3 238 † Model adjusted for age, sex, income, region of residence, hypertension, diabetes, dyslipidemia, congestive heart failure, myocardial infarction,  
4  
5 239 peripheral vascular disease, pulmonary disease, liver disease, and depression histories.  
6  
7  
8  
9  
10  
11  
12  
13  
14  
15  
16  
17  
18  
19  
20  
21  
22  
23  
24  
25  
26  
27  
28  
29  
30  
31  
32  
33  
34  
35  
36  
37  
38  
39  
40  
41  
42  
43  
44  
45  
46

For peer review only

1  
2  
3 240 Compared with the control group, participants who reported migraine with aura and  
4  
5 241 migraine without aura had increased adjusted HRs of 1.44 (95% CI = 1.09-1.89) and 1.15  
6  
7 242 (95% CI = 1.06-1.24) for ischemic stroke, respectively, but no increased risk of hemorrhagic  
8  
9 243 stroke (Table 4).  
10  
11  
12 244  
13  
14 245  
15  
16 246  
17  
18 247  
19  
20 248  
21  
22 249  
23  
24 250  
25  
26 251  
27  
28 252  
29  
30 253  
31  
32 254  
33  
34 255  
35  
36 256  
37  
38 257  
39  
40 258  
41  
42 259  
43  
44 260  
45  
46 261  
47  
48 262  
49  
50 263  
51  
52  
53  
54  
55  
56  
57  
58  
59  
60

264 **Table 4** Subgroup analysis of crude and adjusted hazard ratios (95% confidence interval) of migraine for hemorrhagic stroke and ischemic  
 265 stroke

| Characteristics                            | Hemorrhagic stroke |         |                  |         | Ischemic stroke  |          |                  |          |
|--------------------------------------------|--------------------|---------|------------------|---------|------------------|----------|------------------|----------|
|                                            | Crude              | P-value | Adjusted†        | P-value | Crude            | P-value  | Adjusted†        | P-value  |
| <b>Migraine with Aura (n = 17,290)</b>     |                    |         |                  |         |                  |          |                  |          |
| Migraine                                   |                    | 0.531   |                  | 0.506   |                  | 0.006*   |                  | 0.009*   |
| Yes                                        | 1.17 (0.72-1.90)   |         | 1.19 (0.72-1.96) |         | 1.45 (1.11-1.88) |          | 1.44 (1.09-1.89) |          |
| No                                         | 1.00               |         | 1.00             |         | 1.00             |          | 1.00             |          |
| <b>Migraine without Aura (n = 190,635)</b> |                    |         |                  |         |                  |          |                  |          |
| Migraine                                   |                    | 0.446   |                  | 0.213   |                  | < 0.001* |                  | < 0.001* |
| Yes                                        | 1.05 (0.92-1.20)   |         | 1.09 (0.95-1.25) |         | 1.16 (1.07-1.24) |          | 1.15 (1.06-1.24) |          |
| No                                         | 1.00               |         | 1.00             |         | 1.00             |          | 1.00             |          |

266  
 267 \* Cox proportional hazard regression model; differences were considered significant at  $P < 0.05$ .

268 † Model adjusted for age, sex, income, region of residence, hypertension, diabetes, dyslipidemia, congestive heart failure, myocardial infarction,  
 269 peripheral vascular disease, pulmonary disease, liver disease, and depression histories.

## 270 **Discussion**

271 Migraine appeared to increase the risk of ischemic stroke, but not hemorrhagic stroke. The  
272 risk of ischemic stroke was 1.18-fold greater in the patients with migraine than in the  
273 matched control subjects, even after adjustment for confounding factors. In the subgroup  
274 analyses stratified by age and sex, significant correlations with ischemic stroke were  
275 primarily observed in young women, middle-aged women, and old women. In contrast, the  
276 risk of hemorrhagic stroke was similar in patients with migraine and the matched control  
277 patients.

278 Migraine, particularly migraine with aura, is an established risk factor for ischemic  
279 stroke. In this study, compared with the control group, participants who reported migraine  
280 with aura had an increased adjusted HR of 1.44 (95% CI = 1.09-1.89) for ischemic stroke.  
281 Migraine with aura particularly increases the risk of ischemic stroke, based on the results of  
282 large population-based cohort studies and meta-analyses.<sup>3 15-18</sup> Cortical spreading depression  
283 (CSD) is a self-propagating wave of depolarization across the cerebral cortex at a slow  
284 velocity of 3 to 5 mm/min.<sup>24</sup> CSD has been implicated in migraine with aura, which plays a  
285 critical role in the pathophysiology of ischemic stroke. In an experimental study, CSD altered  
286 the tone of resistance vessels, causing hypoperfusion in tissues at risk for progressive  
287 damage, namely, cortical spreading ischemia.<sup>25</sup> In addition, the inflammatory cascade of the  
288 neurovascular system, which is characterized by endothelial dysfunction and coagulation  
289 abnormalities, may contribute to the development of ischemic stroke. In the aura phase, the  
290 endothelium activates coagulation and thrombosis, which are mediated by inflammatory  
291 cytokines and endothelial biomarkers.<sup>26 27</sup> Moreover, specific genetic etiologies, such as  
292 Factor V Leiden G 619 1A, prothrombin G20210A, and familial hemiplegic migraine type 1,  
293 have been reported in patients diagnosed with migraine with aura. These shared genetic

1  
2  
3 294 factors may precipitate the susceptibility to CSD, which may explain the association between  
4  
5 295 migraine and stroke.<sup>28</sup>

7 296 A growing body of evidence regarding the increased risk of ischemic stroke in patients  
8  
9  
10 297 with migraine without aura. Consistent with the findings from patients reporting migraine  
11  
12 298 with aura, participants who reported migraine without aura had an increased adjusted HR of  
13  
14 299 1.15 (95% CI = 1.06-1.24) for ischemic stroke compared with the control group. Notably, a  
15  
16 300 significant association was observed in cases of ischemic stroke resulting from cervical artery  
17  
18 301 dissection.<sup>29</sup> In addition, genetic overlaps among subjects with migraine without aura, large  
19  
20 302 artery stroke, and cardio-embolic stroke have been identified.<sup>30</sup> However, strong evidence has  
21  
22 303 been not reported. A recent large population-based study reported an statistically insignificant  
23  
24 304 risk of ischemic stroke in patients with migraine without aura but an increased risk in patients  
25  
26 305 with migraine with aura.<sup>3</sup> The study suggested that the difference may be due to changes in  
27  
28 306 the lipid profile, the susceptibility to thrombosis, and genetic predisposition.<sup>3</sup> A meta-analysis  
29  
30 307 did not identify a significant association between migraine without aura and ischemic  
31  
32 308 stroke.<sup>18</sup> In the present study, we did not differentiate between migraine subtypes, such as  
33  
34 309 migraine with and without aura, when analyzing the risk of stroke. Therefore, the risk of  
35  
36 310 ischemic stroke in participants with migraine was relatively low but statistically significant  
37  
38 311 compared to other studies investigating specific conditions.

40 312 Notably, in the present study, migraine was not associated with an increased risk of  
41  
42 313 hemorrhagic stroke. In contrast to the findings from the present study, a recent meta-analysis  
43  
44 314 based on 4 case-control and 4 cohort studies concluded that migraine may increase the risk of  
45  
46 315 hemorrhagic stroke.<sup>20</sup> However, a recent large population-based case-control study did not  
47  
48 316 show an association with different types of hemorrhagic stroke, including intracerebral  
49  
50 317 hemorrhage and subarachnoid hemorrhage.<sup>31</sup> Migraine was an independent risk factor for

1  
2  
3 318 aneurismal rupture (odds ratio [OR] = 2.4; 95% CI 1.1–5.1) in a case-control study,<sup>32</sup> and  
4  
5 319 even if headache is a premonitory symptom of aneurismal rupture, recall biases might have  
6  
7  
8 320 affected the results of the study. Overall, the relatively small number of hemorrhagic stroke  
9  
10 321 cases might have resulted in decreased statistical power.

11  
12 322 In our subgroup analysis, a strong correlation between migraine and ischemic stroke was  
13  
14 323 observed in young patients, specifically young women (20-39 years old). Based on a  
15  
16 324 consensus statement from the European Headache Federation (EHF),<sup>33</sup> the use of a combined  
17  
18 325 hormonal contraceptive may further increase the risk of ischemic stroke in patients with  
19  
20 326 migraine, specifically migraine with aura, supporting our results. Because the predisposing  
21  
22 327 factors for stroke increase the incidence of ischemic stroke with age,<sup>34</sup> migraine itself rather  
23  
24 328 than other risk factors might be implicated in the increased risk of ischemic stroke. In  
25  
26 329 contrast, a recent large, population-based cohort study in Taiwan with a relatively short  
27  
28 330 follow-up duration of 3.6 years did not show a significant association in the subgroups of  
29  
30 331 women and patients aged < 45 years.<sup>3</sup> This discrepancy might be due to differences in the  
31  
32 332 study design, follow-up duration, and ethnic composition of the study population. Recently, a  
33  
34 333 similar trend for this association was also reported,<sup>3</sup> but it requires further confirmation due  
35  
36 334 to the lack of evidence at present.

37  
38 335 The present study has several strengths. The results of this study are consistent with the  
39  
40 336 findings of our previous studies utilizing the HIRA-NSC.<sup>35-37</sup> We examined a very large,  
41  
42 337 representative, and nationwide population. Because the NHIS data cover all citizens of Korea  
43  
44 338 without exception, no participants were lost during follow-up. The control group was  
45  
46 339 randomly selected and matched based on age, sex, income, region of residence, and medical  
47  
48 340 history to decrease any confounding effects. An adjusted hazard model was used to further  
49  
50 341 minimize the impacts of confounders. Because migraine attacks might be frequently repeated,

1  
2  
3 342 we opted to include patients with migraine who underwent treatment at least twice based on  
4  
5 343 the ICD-10 code to increase the validity of the study [G43]. In a previous study, the  
6  
7 344 prevalence of migraine in Korea was reported to be approximately 6.1%.<sup>4</sup> This value  
8  
9 345 appeared to be slightly higher than the value reported in the present study, which was 3.7%  
10  
11 346 (41,585/1,125,691), based on strict inclusion criteria for migraine. In addition, the patients  
12  
13 347 with migraine were followed for 12 years in the present study. Long study periods enable the  
14  
15 348 recruitment of a large study population and allow researchers to observe and analyze the  
16  
17 349 delayed effects of migraine on stroke.  
18  
19  
20

21 350 However, the present study has certain limitations that should be addressed in future  
22  
23 351 studies. First, we were unable to extract information on stroke subtypes and location from the  
24  
25 352 data used in the present study. The impact of migraine on each type of pathophysiology might  
26  
27 353 vary when considering different functional outcomes, survival, and recurrence according to  
28  
29 354 stroke subtype.<sup>38 39</sup> However, in the present study, the distribution of stroke subtypes was not  
30  
31 355 available. The classification of stroke type can lead to a significantly decreased incidence of  
32  
33 356 each disease. As an insufficient number of cases cause inappropriate comparisons due to  
34  
35 357 lower statistical power, the inclusion of the distribution of stroke subtypes would hamper our  
36  
37 358 ability to draw a clear conclusion from the available data. In particular, the absolute incidence  
38  
39 359 of hemorrhagic stroke is very low in general practice; therefore, most of studies did not  
40  
41 360 provide information about subtypes, such as the presence of an aneurysm, although the  
42  
43 361 association is positive in public health studies.<sup>31</sup> Second, a firm correlation between the  
44  
45 362 frequency of migraine attacks and the risk of stroke has been reported,<sup>40</sup> but we were unable  
46  
47 363 to confirm this correlation using the claim data analyzed in the present study. Similarly, the  
48  
49 364 duration and severity of migraine were inconsistent among the study population. Patients  
50  
51 365 with migraine who had mild complaints may not have received a consultation at the clinic;  
52  
53  
54  
55  
56  
57  
58  
59  
60



1  
2  
3 366 therefore, the impact of migraine on stroke may be underestimated in this study. Third,  
4  
5 367 although this study attempted to include a large, representative patient population and  
6  
7 368 subsequently matched and adjusted for possible confounders, the risk factors for stroke in  
8  
9 369 patients with migraine, such as cigarette smoking, obesity, and migraine-specific drugs, were  
10  
11 370 not available in the insurance database.<sup>11 40</sup> Finally, in the present study, the incidence of  
12  
13 371 migraine was 3.7% (41,585 of 1,125,691 participants) after employing a strict matching  
14  
15 372 protocol. Before matching, the incidence of migraine in Korea was 4.1% (45,587 of  
16  
17 373 1,125,691 participants). This value is consistent with previous cohort study in Korea,  
18  
19 374 indicating that the overall prevalence rate of migraine was 6.1%,<sup>8</sup> despite the use of different  
20  
21 375 study designs. Given the global prevalence of migraine of approximately 8–15%,<sup>9 10</sup> the  
22  
23 376 incidence of migraine in Korea is relatively low because of limited claim data. Only patients  
24  
25 377 with migraine who visited the hospital are recorded. In other words, data are not available for  
26  
27 378 patients with weak migraine symptoms or patients who do not visit a hospital, leading to a  
28  
29 379 lower incidence. Based on a population-based epidemiological study of migraine in Korea,  
30  
31 380 only 24.4% of patients ever consulted a doctor for headache and only 3.3% of patients were  
32  
33 381 prescribed a drug by a doctor.<sup>11</sup>

382

### 383 **Conclusions**

384 Based on a large population-based cohort study in Korea, migraine increased the risk of  
385 ischemic stroke, but not hemorrhagic stroke. The subgroup of patients at the highest risk of  
386 developing ischemic stroke was young women.

387

### 388 **ACKNOWLEDGMENTS**

1  
2  
3 389 We thank the participants and examiners of Korean Health Insurance Review and Assessment  
4  
5 390 for participating in this cohort study and providing the data, respectively.  
6  
7  
8 391

9  
10 392 **DATA SHARING STATEMENT**  
11

12 393 No additional data are available.  
13  
14 394

15  
16  
17 395 **FUNDING STATEMENT**  
18

19 396 This work was supported by the Hallym University Research Fund and in part by a research  
20  
21 397 grant (NRF-2015-R1D1A1A01060860) from the National Research Foundation (NRF) of  
22  
23 398 Korea.  
24  
25 399

26  
27  
28 400 **COMPETING INTERESTS STATEMENT**  
29

30 401 None of the authors have competing interests to declare.  
31  
32 402

33  
34  
35 403 **AUTHORS' CONTRIBUTIONS**  
36

37 404 As the first author, SYL wrote the manuscript. DJO and JSL analyzed and interpreted the  
38  
39 405 data. IGK processed the data. HGC conceptualized, wrote, and reviewed the manuscript.  
40  
41 406

42  
43  
44 407 **References**  
45

- 46 408 1. Charles A. Migraine. *N Engl J Med* 2017;377(6):553-61. doi: 10.1056/NEJMcp1605502  
47  
48 409 2. Lipton RB, Scher AI, Kolodner K, et al. Migraine in the United States: epidemiology and  
49  
50 410 patterns of health care use. *Neurology* 2002;58(6):885-94.  
51  
52  
53  
54  
55  
56  
57  
58  
59  
60

- 1  
2  
3 411 3. Peng KP, Chen YT, Fuh JL, et al. Migraine and incidence of ischemic stroke: A  
4  
5 412 nationwide population-based study. *Cephalalgia* 2017;37(4):327-35. doi:  
6  
7 413 10.1177/0333102416642602  
8  
9  
10 414 4. Kim BK, Chu MK, Lee TG, et al. Prevalence and impact of migraine and tension-type  
11  
12 415 headache in Korea. *J Clin Neurol* 2012;8(3):204-11. doi: 10.3988/jcn.2012.8.3.204  
13  
14 416 5. Wood H. Migraine: Migraine - a risk factor for cardiovascular disease? *Nat Rev Neurol*  
15  
16 417 2018;14(4):194-95. doi: 10.1038/nrneurol.2018.18  
17  
18 418 6. Feigin VL, Lawes CM, Bennett DA, et al. Worldwide stroke incidence and early case  
19  
20 419 fatality reported in 56 population-based studies: a systematic review. *The Lancet*  
21  
22 420 *Neurology* 2009;8(4):355-69.  
23  
24 421 7. Ojaghihaghghi S, Vahdati SS, Mikaeilpour A, et al. Comparison of neurological clinical  
25  
26 422 manifestation in patients with hemorrhagic and ischemic stroke. *World journal of*  
27  
28 423 *emergency medicine* 2017;8(1):34.  
29  
30 424 8. Hong KS, Bang OY, Kang DW, et al. Stroke statistics in Korea: part I. Epidemiology and  
31  
32 425 risk factors: a report from the Korean stroke society and clinical research center for  
33  
34 426 stroke. *J Stroke* 2013;15(1):2-20. doi: 10.5853/jos.2013.15.1.2  
35  
36 427 9. Andersen KK, Olsen TS, Dehlendorff C, et al. Hemorrhagic and ischemic strokes  
37  
38 428 compared: stroke severity, mortality, and risk factors. *Stroke* 2009;40(6):2068-72. doi:  
39  
40 429 10.1161/STROKEAHA.108.540112  
41  
42 430 10. Das S, Roy S, Kaul S, et al. E-selectin gene (S128R) polymorphism in hemorrhagic  
43  
44 431 stroke: comparison with ischemic stroke. *Neurosci Lett* 2014;581:125-8. doi:  
45  
46 432 10.1016/j.neulet.2014.08.032  
47  
48 433 11. Gryglas A, Smigiel R. Migraine and Stroke: What's the Link? What to Do? *Curr Neurol*  
49  
50 434 *Neurosci Rep* 2017;17(3):22. doi: 10.1007/s11910-017-0729-y  
51  
52  
53  
54  
55  
56  
57  
58  
59  
60

- 1  
2  
3 435 12. Lee MJ, Lee C, Chung CS. The Migraine-Stroke Connection. *J Stroke* 2016;18(2):146-  
4  
5 436 56. doi: 10.5853/jos.2015.01683  
6  
7  
8 437 13. Eikermann-Haerter K, Lee JH, Yuzawa I, et al. Migraine mutations increase stroke  
9  
10 438 vulnerability by facilitating ischemic depolarizations. *Circulation* 2012;125(2):335-  
11  
12 439 45. doi: 10.1161/CIRCULATIONAHA.111.045096  
13  
14  
15 440 14. Timm FP, Houle TT, Grabitz SD, et al. Migraine and risk of perioperative ischemic  
16  
17 441 stroke and hospital readmission: hospital based registry study. *BMJ* 2017;356:i6635.  
18  
19 442 doi: 10.1136/bmj.i6635  
20  
21  
22 443 15. Kurth T, Schurks M, Logroscino G, et al. Migraine, vascular risk, and cardiovascular  
23  
24 444 events in women: prospective cohort study. *BMJ* 2008;337:a636. doi:  
25  
26 445 10.1136/bmj.a636  
27  
28  
29 446 16. Kurth T, Gaziano JM, Cook NR, et al. Migraine and risk of cardiovascular disease in  
30  
31 447 women. *JAMA* 2006;296(3):283-91. doi: 10.1001/jama.296.3.283  
32  
33  
34 448 17. Monteith TS, Gardener H, Rundek T, et al. Migraine and risk of stroke in older adults:  
35  
36 449 Northern Manhattan Study. *Neurology* 2015;85(8):715-21. doi:  
37  
38 450 10.1212/WNL.0000000000001854  
39  
40  
41 451 18. Spector JT, Kahn SR, Jones MR, et al. Migraine headache and ischemic stroke risk: an  
42  
43 452 updated meta-analysis. *Am J Med* 2010;123(7):612-24. doi:  
44  
45 453 10.1016/j.amjmed.2009.12.021  
46  
47  
48 454 19. Kuo CY, Yen MF, Chen LS, et al. Increased risk of hemorrhagic stroke in patients with  
49  
50 455 migraine: a population-based cohort study. *PLoS One* 2013;8(1):e55253. doi:  
51  
52 456 10.1371/journal.pone.0055253  
53  
54  
55 457 20. Sacco S, Ornello R, Ripa P, et al. Migraine and hemorrhagic stroke: a meta-analysis.  
56  
57 458 *Stroke* 2013;44(11):3032-8. doi: 10.1161/STROKEAHA.113.002465  
58  
59  
60

- 1  
2  
3 459 21. Lee J, Lee JS, Park SH, et al. Cohort Profile: The National Health Insurance Service-  
4  
5 460 National Sample Cohort (NHIS-NSC), South Korea. *International journal of*  
6  
7 461 *epidemiology* 2016 doi: 10.1093/ije/dyv319  
8  
9  
10 462 22. <http://nhiss.nhis.or.kr/>.  
11  
12 463 23. Kim RB, Kim BG, Kim YM, et al. Trends in the incidence of hospitalized acute  
13  
14 464 myocardial infarction and stroke in Korea, 2006-2010. *J Korean Med Sci*  
15  
16 465 2013;28(1):16-24. doi: 10.3346/jkms.2013.28.1.16  
17  
18  
19 466 24. Tietjen EG. Migraine and ischaemic heart disease and stroke: potential mechanisms and  
20  
21 467 treatment implications. *Cephalalgia* 2007;27(8):981-7. doi: 10.1111/j.1468-  
22  
23 468 2982.2007.01407.x  
24  
25  
26 469 25. Dreier JP, Major S, Manning A, et al. Cortical spreading ischaemia is a novel process  
27  
28 470 involved in ischaemic damage in patients with aneurysmal subarachnoid  
29  
30 471 haemorrhage. *Brain* 2009;132(Pt 7):1866-81. doi: 10.1093/brain/awp102  
31  
32  
33 472 26. Liman TG, Bachelier-Walenta K, Neeb L, et al. Circulating endothelial microparticles in  
34  
35 473 female migraineurs with aura. *Cephalalgia* 2015;35(2):88-94.  
36  
37  
38 474 27. Rajendran P, Rengarajan T, Thangavel J, et al. The vascular endothelium and human  
39  
40 475 diseases. *International journal of biological sciences* 2013;9(10):1057.  
41  
42 476 28. Pezzini A, Grassi M, Lodigiani C, et al. Predictors of migraine subtypes in young adults  
43  
44 477 with ischemic stroke: the italian project on stroke in young adults. *Stroke*  
45  
46 478 2011;42(1):17-21. doi: 10.1161/STROKEAHA.110.592246  
47  
48  
49 479 29. De Giuli V, Grassi M, Lodigiani C, et al. Association between migraine and cervical  
50  
51 480 artery dissection: the Italian project on stroke in young adults. *JAMA neurology*  
52  
53 481 2017;74(5):512-18.  
54  
55  
56  
57  
58  
59  
60

- 1  
2  
3 482 30. Malik R, Freilinger T, Winsvold BS, et al. Shared genetic basis for migraine and ischemic  
4  
5 483 stroke: A genome-wide analysis of common variants. *Neurology* 2015;84(21):2132-  
6  
7 484 45. doi: 10.1212/WNL.0000000000001606  
8  
9  
10 485 31. Gaist D, Gonzalez-Perez A, Ashina M, et al. Migraine and risk of hemorrhagic stroke: a  
11  
12 486 study based on data from general practice. *J Headache Pain* 2014;15:74. doi:  
13  
14 487 10.1186/1129-2377-15-74  
15  
16  
17 488 32. Vlak MH, Rinkel GJ, Greebe P, et al. Risk of rupture of an intracranial aneurysm based  
18  
19 489 on patient characteristics: a case-control study. *Stroke* 2013;44(5):1256-9. doi:  
20  
21 490 10.1161/STROKEAHA.111.000679  
22  
23  
24 491 33. Sacco S, Merki-Feld GS, KL AE, et al. Hormonal contraceptives and risk of ischemic  
25  
26 492 stroke in women with migraine: a consensus statement from the European Headache  
27  
28 493 Federation (EHF) and the European Society of Contraception and Reproductive  
29  
30 494 Health (ESC). *J Headache Pain* 2017;18(1):108. doi: 10.1186/s10194-017-0815-1  
31  
32  
33 495 34. Tsai CF, Anderson N, Thomas B, et al. Comparing Risk Factor Profiles between  
34  
35 496 Intracerebral Hemorrhage and Ischemic Stroke in Chinese and White Populations:  
36  
37 497 Systematic Review and Meta-Analysis. *PLoS One* 2016;11(3):e0151743. doi:  
38  
39 498 10.1371/journal.pone.0151743  
40  
41  
42 499 35. Choi HG, Park B, Sim S, et al. Tonsillectomy Does Not Reduce Upper Respiratory  
43  
44 500 Infections: A National Cohort Study. *PLoS One* 2016;11(12):e0169264. doi:  
45  
46 501 10.1371/journal.pone.0169264  
47  
48  
49 502 36. Kim SY, Kim HJ, Park EK, et al. Severe hearing impairment and risk of depression: A  
50  
51 503 national cohort study. *PLoS One* 2017;12(6):e0179973. doi:  
52  
53 504 10.1371/journal.pone.0179973  
54  
55  
56  
57  
58  
59  
60

- 1  
2  
3 505 37. Kim MS, Kim SY, Kim JH, et al. Depression in breast cancer patients who have  
4  
5 506 undergone mastectomy: A national cohort study. *PLoS One* 2017;12(4):e0175395.  
6  
7 507 doi: 10.1371/journal.pone.0175395  
8  
9  
10 508 38. Kurth T, Diener HC. Current views of the risk of stroke for migraine with and migraine  
11  
12 509 without aura. *Curr Pain Headache Rep* 2006;10(3):214-20.  
13  
14 510 39. Petty GW, Brown RD, Jr., Whisnant JP, et al. Ischemic stroke subtypes : a population-  
15  
16 511 based study of functional outcome, survival, and recurrence. *Stroke* 2000;31(5):1062-  
17  
18 512 8.  
19  
20  
21 513 40. Bousser M-G, Welch KMA. Relation between migraine and stroke. *The Lancet*  
22  
23 514 *Neurology* 2005;4(9):533-42.  
24  
25  
26 515

27  
28 516 **Figure Legend**

29  
30 517 **Fig. 1** A schematic illustrating the participant selection process used in the present study. Of  
31  
32 518 a total of 1,125,691 participants, 41,585 participants with migraine were matched with  
33  
34 519 166,340 control participants for age, group, sex, income level, region of residence, and past  
35  
36 520 medical histories.  
37  
38  
39  
40  
41  
42  
43  
44  
45  
46  
47  
48  
49  
50  
51  
52  
53  
54  
55  
56  
57  
58  
59  
60

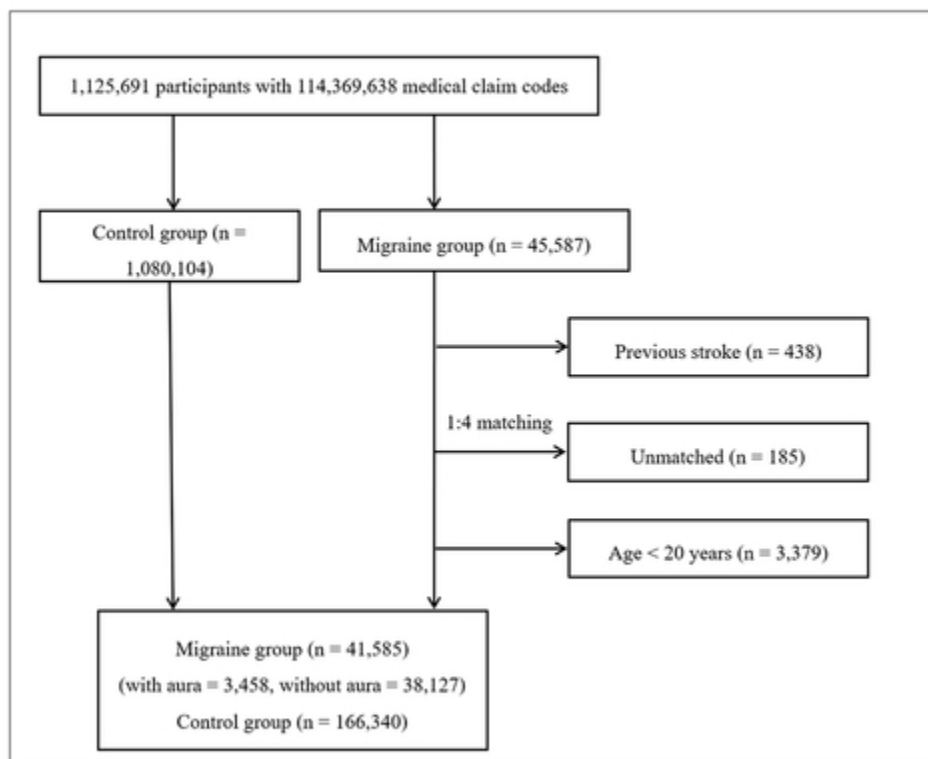

Figure 1

42x42mm (300 x 300 DPI)



## S1. Subgroup analysis of migraine prevalence and stroke occurrence

| Characteristics    | Young men (20-39 years old, n = 15,550)       |                              |         | Young women (20-39 years old, n = 47,410)       |                              |          |
|--------------------|-----------------------------------------------|------------------------------|---------|-------------------------------------------------|------------------------------|----------|
|                    | Migraine<br>(n = 3,110, %)                    | Non-Migraine<br>(n = 12,440) | P-value | Migraine<br>(n = 9,482)                         | Non-Migraine<br>(n = 37,928) | P-value  |
| Ischemic stroke    |                                               |                              | 0.015*  |                                                 |                              | < 0.001* |
| Yes                | 15 (0.48)                                     | 28 (0.22)                    |         | 26 (0.27)                                       | 41 (0.11)                    |          |
| No                 | 3,095 (99.52)                                 | 12,412 (99.78)               |         | 9,456 (99.73)                                   | 37,887 (99.89)               |          |
| Hemorrhagic stroke |                                               |                              | 0.157   |                                                 |                              | 0.727    |
| Yes                | 14 (0.45)                                     | 36 (0.28)                    |         | 16 (0.17)                                       | 58 (0.15)                    |          |
| No                 | 3,096 (99.55)                                 | 12,404 (99.72)               |         | 9,466 (99.73)                                   | 37,870 (99.85)               |          |
| Characteristics    | Middle-aged men (40-59 years old, n = 22,090) |                              |         | Middle-aged women (40-59 years old, n = 68,240) |                              |          |
|                    | Migraine<br>(n = 4,418)                       | Non-Migraine<br>(n = 17,672) | P-value | Migraine<br>(n = 9,482)                         | Non-Migraine<br>(n = 37,928) | P-value  |
| Ischemic stroke    |                                               |                              | 0.560   |                                                 |                              | 0.002*   |
| Yes                | 68 (1.54)                                     | 294 (1.66)                   |         | 138 (1.46)                                      | 409 (1.08)                   |          |
| No                 | 4,350 (98.46)                                 | 17,378 (98.34)               |         | 13,648 (98.54)                                  | 54,952 (98.92)               |          |

|                    |                                             |                |         |                                               |                |         |
|--------------------|---------------------------------------------|----------------|---------|-----------------------------------------------|----------------|---------|
| Hemorrhagic stroke |                                             | 0.157          |         |                                               | 0.727          |         |
| Yes                | 34 (0.77)                                   | 127 (0.72)     |         | 78 (0.82)                                     | 291 (0.77)     |         |
| No                 | 4,384 (99.23)                               | 17,545 (99.28) |         | 13,570 (99.18)                                | 54,301 (99.23) |         |
| Characteristics    | <b>Old men (≥ 60 years old, n = 14,740)</b> |                |         | <b>Old women (≥ 60 years old, n = 39,895)</b> |                |         |
|                    | Migraine                                    | Non-Migraine   | P-value | Migraine                                      | Non-Migraine   | P-value |
|                    | (n = 2,948)                                 | (n = 11,792)   |         | (n = 7,979)                                   | (n = 31,916)   |         |
| Ischemic stroke    |                                             | 0.015*         |         |                                               | 0.002*         |         |
| Yes                | 205 (7.0)                                   | 756 (6.4)      |         | 512 (6.4)                                     | 1,766 (5.5)    |         |
| No                 | 2,743 (93.0)                                | 11,036 (93.6)  |         | 7,467 (93.6)                                  | 30,150 (94.5)  |         |
| Hemorrhagic stroke |                                             | 0.157          |         |                                               | 0.465          |         |
| Yes                | 50 (1.7)                                    | 155 (1.3)      |         | 103 (1.3)                                     | 446 (1.4)      |         |
| No                 | 2,898 (98.3)                                | 11,637 (98.7)  |         | 7,876 (98.7)                                  | 31,470 (98.6)  |         |

\* Chi-square test; differences were considered significant at  $P < 0.05$ .

# Reporting checklist for cohort study.

Based on the STROBE cohort guidelines.

## Instructions to authors

Complete this checklist by entering the page numbers from your manuscript where readers will find each of the items listed below.

Your article may not currently address all the items on the checklist. Please modify your text to include the missing information. If you are certain that an item does not apply, please write "n/a" and provide a short explanation.

Upload your completed checklist as an extra file when you submit to a journal.

In your methods section, say that you used the STROBE cohort reporting guidelines, and cite them as:

von Elm E, Altman DG, Egger M, Pocock SJ, Gøtzsche PC, Vandenbroucke JP. The Strengthening the Reporting of Observational Studies in Epidemiology (STROBE) Statement: guidelines for reporting observational studies.

|          |                     |                                                                                                 | Page   |
|----------|---------------------|-------------------------------------------------------------------------------------------------|--------|
|          |                     | Reporting Item                                                                                  | Number |
| Title    | <a href="#">#1a</a> | Indicate the study's design with a commonly used term in the title or the abstract              | 1      |
| Abstract | <a href="#">#1b</a> | Provide in the abstract an informative and balanced summary of what was done and what was found | 2      |

|    |                      |                     |                                                                 |     |
|----|----------------------|---------------------|-----------------------------------------------------------------|-----|
| 1  | Background /         | <a href="#">#2</a>  | Explain the scientific background and rationale for the         | 4-5 |
| 2  |                      |                     |                                                                 |     |
| 3  | rationale            |                     | investigation being reported                                    |     |
| 4  |                      |                     |                                                                 |     |
| 5  |                      |                     |                                                                 |     |
| 6  | Objectives           | <a href="#">#3</a>  | State specific objectives, including any prespecified           | 5   |
| 7  |                      |                     |                                                                 |     |
| 8  |                      |                     | hypotheses                                                      |     |
| 9  |                      |                     |                                                                 |     |
| 10 |                      |                     |                                                                 |     |
| 11 |                      |                     |                                                                 |     |
| 12 | Study design         | <a href="#">#4</a>  | Present key elements of study design early in the paper         | 5   |
| 13 |                      |                     |                                                                 |     |
| 14 |                      |                     |                                                                 |     |
| 15 | Setting              | <a href="#">#5</a>  | Describe the setting, locations, and relevant dates, including  | 5-6 |
| 16 |                      |                     |                                                                 |     |
| 17 |                      |                     | periods of recruitment, exposure, follow-up, and data           |     |
| 18 |                      |                     |                                                                 |     |
| 19 |                      |                     | collection                                                      |     |
| 20 |                      |                     |                                                                 |     |
| 21 |                      |                     |                                                                 |     |
| 22 | Eligibility criteria | <a href="#">#6a</a> | Give the eligibility criteria, and the sources and methods of   | 6-7 |
| 23 |                      |                     |                                                                 |     |
| 24 |                      |                     | selection of participants. Describe methods of follow-up.       |     |
| 25 |                      |                     |                                                                 |     |
| 26 |                      |                     |                                                                 |     |
| 27 |                      |                     |                                                                 |     |
| 28 |                      | <a href="#">#6b</a> | For matched studies, give matching criteria and number of       | 6-7 |
| 29 |                      |                     |                                                                 |     |
| 30 |                      |                     | exposed and unexposed                                           |     |
| 31 |                      |                     |                                                                 |     |
| 32 |                      |                     |                                                                 |     |
| 33 | Variables            | <a href="#">#7</a>  | Clearly define all outcomes, exposures, predictors, potential   | 7-8 |
| 34 |                      |                     |                                                                 |     |
| 35 |                      |                     | confounders, and effect modifiers. Give diagnostic criteria, if |     |
| 36 |                      |                     |                                                                 |     |
| 37 |                      |                     | applicable                                                      |     |
| 38 |                      |                     |                                                                 |     |
| 39 |                      |                     |                                                                 |     |
| 40 |                      |                     |                                                                 |     |
| 41 | Data sources /       | <a href="#">#8</a>  | For each variable of interest give sources of data and details  | 5-8 |
| 42 |                      |                     |                                                                 |     |
| 43 | measurement          |                     | of methods of assessment (measurement). Describe                |     |
| 44 |                      |                     |                                                                 |     |
| 45 |                      |                     | comparability of assessment methods if there is more than       |     |
| 46 |                      |                     |                                                                 |     |
| 47 |                      |                     | one group. Give information separately for for exposed and      |     |
| 48 |                      |                     |                                                                 |     |
| 49 |                      |                     | unexposed groups if applicable.                                 |     |
| 50 |                      |                     |                                                                 |     |
| 51 |                      |                     |                                                                 |     |
| 52 |                      |                     |                                                                 |     |
| 53 | Bias                 | <a href="#">#9</a>  | Describe any efforts to address potential sources of bias       | 5-8 |
| 54 |                      |                     |                                                                 |     |
| 55 |                      |                     |                                                                 |     |
| 56 | Study size           | <a href="#">#10</a> | Explain how the study size was arrived at                       | 7   |
| 57 |                      |                     |                                                                 |     |
| 58 |                      |                     |                                                                 |     |
| 59 |                      |                     |                                                                 |     |
| 60 |                      |                     |                                                                 |     |

|    |                        |                      |                                                                                                                                                                                                                   |                                                                                                                                                                                                                                                                            |    |
|----|------------------------|----------------------|-------------------------------------------------------------------------------------------------------------------------------------------------------------------------------------------------------------------|----------------------------------------------------------------------------------------------------------------------------------------------------------------------------------------------------------------------------------------------------------------------------|----|
| 1  | Quantitative variables | <a href="#">#11</a>  | Explain how quantitative variables were handled in the analyses. If applicable, describe which groupings were chosen, and why                                                                                     | 7                                                                                                                                                                                                                                                                          |    |
| 2  |                        | Statistical methods  | <a href="#">#12a</a>                                                                                                                                                                                              | Describe all statistical methods, including those used to control for confounding                                                                                                                                                                                          | 8  |
| 3  |                        |                      | <a href="#">#12b</a>                                                                                                                                                                                              | Describe any methods used to examine subgroups and interactions                                                                                                                                                                                                            | 8  |
| 4  |                        |                      | <a href="#">#12c</a>                                                                                                                                                                                              | Explain how missing data were addressed                                                                                                                                                                                                                                    | NA |
| 5  |                        |                      | <a href="#">#12d</a>                                                                                                                                                                                              | If applicable, explain how loss to follow-up was addressed                                                                                                                                                                                                                 | NA |
| 6  |                        |                      | <a href="#">#12e</a>                                                                                                                                                                                              | Describe any sensitivity analyses                                                                                                                                                                                                                                          | NA |
| 7  |                        | Participants         | <a href="#">#13a</a>                                                                                                                                                                                              | Report numbers of individuals at each stage of study—eg numbers potentially eligible, examined for eligibility, confirmed eligible, included in the study, completing follow-up, and analysed. Give information separately for exposed and unexposed groups if applicable. | NA |
| 8  | <a href="#">#13b</a>   |                      | Give reasons for non-participation at each stage                                                                                                                                                                  | NA                                                                                                                                                                                                                                                                         |    |
| 9  | <a href="#">#13c</a>   |                      | Consider use of a flow diagram                                                                                                                                                                                    | 7                                                                                                                                                                                                                                                                          |    |
| 10 | Descriptive data       | <a href="#">#14a</a> | Give characteristics of study participants (eg demographic, clinical, social) and information on exposures and potential confounders. Give information separately for exposed and unexposed groups if applicable. | 8-13                                                                                                                                                                                                                                                                       |    |
| 11 |                        |                      |                                                                                                                                                                                                                   |                                                                                                                                                                                                                                                                            |    |
| 12 |                        |                      |                                                                                                                                                                                                                   |                                                                                                                                                                                                                                                                            |    |
| 13 |                        |                      |                                                                                                                                                                                                                   |                                                                                                                                                                                                                                                                            |    |
| 14 |                        |                      |                                                                                                                                                                                                                   |                                                                                                                                                                                                                                                                            |    |
| 15 |                        |                      |                                                                                                                                                                                                                   |                                                                                                                                                                                                                                                                            |    |
| 16 |                        |                      |                                                                                                                                                                                                                   |                                                                                                                                                                                                                                                                            |    |
| 17 |                        |                      |                                                                                                                                                                                                                   |                                                                                                                                                                                                                                                                            |    |
| 18 |                        |                      |                                                                                                                                                                                                                   |                                                                                                                                                                                                                                                                            |    |
| 19 |                        |                      |                                                                                                                                                                                                                   |                                                                                                                                                                                                                                                                            |    |
| 20 |                        |                      |                                                                                                                                                                                                                   |                                                                                                                                                                                                                                                                            |    |
| 21 |                        |                      |                                                                                                                                                                                                                   |                                                                                                                                                                                                                                                                            |    |
| 22 |                        |                      |                                                                                                                                                                                                                   |                                                                                                                                                                                                                                                                            |    |
| 23 |                        |                      |                                                                                                                                                                                                                   |                                                                                                                                                                                                                                                                            |    |
| 24 |                        |                      |                                                                                                                                                                                                                   |                                                                                                                                                                                                                                                                            |    |
| 25 |                        |                      |                                                                                                                                                                                                                   |                                                                                                                                                                                                                                                                            |    |
| 26 |                        |                      |                                                                                                                                                                                                                   |                                                                                                                                                                                                                                                                            |    |
| 27 |                        |                      |                                                                                                                                                                                                                   |                                                                                                                                                                                                                                                                            |    |
| 28 |                        |                      |                                                                                                                                                                                                                   |                                                                                                                                                                                                                                                                            |    |
| 29 |                        |                      |                                                                                                                                                                                                                   |                                                                                                                                                                                                                                                                            |    |
| 30 |                        |                      |                                                                                                                                                                                                                   |                                                                                                                                                                                                                                                                            |    |
| 31 |                        |                      |                                                                                                                                                                                                                   |                                                                                                                                                                                                                                                                            |    |
| 32 |                        |                      |                                                                                                                                                                                                                   |                                                                                                                                                                                                                                                                            |    |
| 33 |                        |                      |                                                                                                                                                                                                                   |                                                                                                                                                                                                                                                                            |    |
| 34 |                        |                      |                                                                                                                                                                                                                   |                                                                                                                                                                                                                                                                            |    |
| 35 |                        |                      |                                                                                                                                                                                                                   |                                                                                                                                                                                                                                                                            |    |
| 36 |                        |                      |                                                                                                                                                                                                                   |                                                                                                                                                                                                                                                                            |    |
| 37 |                        |                      |                                                                                                                                                                                                                   |                                                                                                                                                                                                                                                                            |    |
| 38 |                        |                      |                                                                                                                                                                                                                   |                                                                                                                                                                                                                                                                            |    |
| 39 |                        |                      |                                                                                                                                                                                                                   |                                                                                                                                                                                                                                                                            |    |
| 40 |                        |                      |                                                                                                                                                                                                                   |                                                                                                                                                                                                                                                                            |    |
| 41 |                        |                      |                                                                                                                                                                                                                   |                                                                                                                                                                                                                                                                            |    |
| 42 |                        |                      |                                                                                                                                                                                                                   |                                                                                                                                                                                                                                                                            |    |
| 43 |                        |                      |                                                                                                                                                                                                                   |                                                                                                                                                                                                                                                                            |    |
| 44 |                        |                      |                                                                                                                                                                                                                   |                                                                                                                                                                                                                                                                            |    |
| 45 |                        |                      |                                                                                                                                                                                                                   |                                                                                                                                                                                                                                                                            |    |
| 46 |                        |                      |                                                                                                                                                                                                                   |                                                                                                                                                                                                                                                                            |    |
| 47 |                        |                      |                                                                                                                                                                                                                   |                                                                                                                                                                                                                                                                            |    |
| 48 |                        |                      |                                                                                                                                                                                                                   |                                                                                                                                                                                                                                                                            |    |
| 49 |                        |                      |                                                                                                                                                                                                                   |                                                                                                                                                                                                                                                                            |    |
| 50 |                        |                      |                                                                                                                                                                                                                   |                                                                                                                                                                                                                                                                            |    |
| 51 |                        |                      |                                                                                                                                                                                                                   |                                                                                                                                                                                                                                                                            |    |
| 52 |                        |                      |                                                                                                                                                                                                                   |                                                                                                                                                                                                                                                                            |    |
| 53 |                        |                      |                                                                                                                                                                                                                   |                                                                                                                                                                                                                                                                            |    |
| 54 |                        |                      |                                                                                                                                                                                                                   |                                                                                                                                                                                                                                                                            |    |
| 55 |                        |                      |                                                                                                                                                                                                                   |                                                                                                                                                                                                                                                                            |    |
| 56 |                        |                      |                                                                                                                                                                                                                   |                                                                                                                                                                                                                                                                            |    |
| 57 |                        |                      |                                                                                                                                                                                                                   |                                                                                                                                                                                                                                                                            |    |
| 58 |                        |                      |                                                                                                                                                                                                                   |                                                                                                                                                                                                                                                                            |    |
| 59 |                        |                      |                                                                                                                                                                                                                   |                                                                                                                                                                                                                                                                            |    |
| 60 |                        |                      |                                                                                                                                                                                                                   |                                                                                                                                                                                                                                                                            |    |

|    |                |                      |                                                                   |       |
|----|----------------|----------------------|-------------------------------------------------------------------|-------|
| 1  |                | <a href="#">#14b</a> | Indicate number of participants with missing data for each        | 8-13  |
| 2  |                |                      | variable of interest                                              |       |
| 3  |                |                      |                                                                   |       |
| 4  |                |                      |                                                                   |       |
| 5  |                |                      |                                                                   |       |
| 6  |                | <a href="#">#14c</a> | Summarise follow-up time (eg, average and total amount)           | 8     |
| 7  |                |                      |                                                                   |       |
| 8  |                |                      |                                                                   |       |
| 9  |                |                      |                                                                   |       |
| 10 | Outcome data   | <a href="#">#15</a>  | Report numbers of outcome events or summary measures              | NA    |
| 11 |                |                      | over time. Give information separately for exposed and            |       |
| 12 |                |                      | unexposed groups if applicable.                                   |       |
| 13 |                |                      |                                                                   |       |
| 14 |                |                      |                                                                   |       |
| 15 |                |                      |                                                                   |       |
| 16 |                |                      |                                                                   |       |
| 17 | Main results   | <a href="#">#16a</a> | Give unadjusted estimates and, if applicable, confounder-         | 8-13  |
| 18 |                |                      | adjusted estimates and their precision (eg, 95% confidence        |       |
| 19 |                |                      | interval). Make clear which confounders were adjusted for         |       |
| 20 |                |                      | and why they were included                                        |       |
| 21 |                |                      |                                                                   |       |
| 22 |                |                      |                                                                   |       |
| 23 |                |                      |                                                                   |       |
| 24 |                |                      |                                                                   |       |
| 25 |                |                      |                                                                   |       |
| 26 |                |                      |                                                                   |       |
| 27 |                | <a href="#">#16b</a> | Report category boundaries when continuous variables were         | NA    |
| 28 |                |                      | categorized                                                       |       |
| 29 |                |                      |                                                                   |       |
| 30 |                |                      |                                                                   |       |
| 31 |                |                      |                                                                   |       |
| 32 |                |                      |                                                                   |       |
| 33 |                | <a href="#">#16c</a> | If relevant, consider translating estimates of relative risk into | NA    |
| 34 |                |                      | absolute risk for a meaningful time period                        |       |
| 35 |                |                      |                                                                   |       |
| 36 |                |                      |                                                                   |       |
| 37 |                |                      |                                                                   |       |
| 38 | Other analyses | <a href="#">#17</a>  | Report other analyses done—e.g., analyses of subgroups            | 13-14 |
| 39 |                |                      | and interactions, and sensitivity analyses                        |       |
| 40 |                |                      |                                                                   |       |
| 41 |                |                      |                                                                   |       |
| 42 |                |                      |                                                                   |       |
| 43 | Key results    | <a href="#">#18</a>  | Summarise key results with reference to study objectives          | 16    |
| 44 |                |                      |                                                                   |       |
| 45 |                |                      |                                                                   |       |
| 46 | Limitations    | <a href="#">#19</a>  | Discuss limitations of the study, taking into account sources     |       |
| 47 |                |                      | of potential bias or imprecision. Discuss both direction and      |       |
| 48 |                |                      | magnitude of any potential bias.                                  |       |
| 49 |                |                      |                                                                   |       |
| 50 |                |                      |                                                                   |       |
| 51 |                |                      |                                                                   |       |
| 52 |                |                      |                                                                   |       |
| 53 |                |                      |                                                                   |       |
| 54 |                |                      |                                                                   |       |
| 55 |                |                      |                                                                   |       |
| 56 |                |                      |                                                                   |       |
| 57 |                |                      |                                                                   |       |
| 58 |                |                      |                                                                   |       |
| 59 |                |                      |                                                                   |       |
| 60 |                |                      |                                                                   |       |

|    |                  |                     |                                                                |       |
|----|------------------|---------------------|----------------------------------------------------------------|-------|
| 1  | Interpretation   | <a href="#">#20</a> | Give a cautious overall interpretation considering objectives, | 19    |
| 2  |                  |                     |                                                                |       |
| 3  |                  |                     |                                                                |       |
| 4  |                  |                     | limitations, multiplicity of analyses, results from similar    |       |
| 5  |                  |                     |                                                                |       |
| 6  |                  |                     | studies, and other relevant evidence.                          |       |
| 7  |                  |                     |                                                                |       |
| 8  |                  |                     |                                                                |       |
| 9  | Generalisability | <a href="#">#21</a> | Discuss the generalisability (external validity) of the study  | 16-18 |
| 10 |                  |                     |                                                                |       |
| 11 |                  |                     | results                                                        |       |
| 12 |                  |                     |                                                                |       |
| 13 |                  |                     |                                                                |       |
| 14 | Funding          | <a href="#">#22</a> | Give the source of funding and the role of the funders for the | 20    |
| 15 |                  |                     |                                                                |       |
| 16 |                  |                     |                                                                |       |
| 17 |                  |                     | present study and, if applicable, for the original study on    |       |
| 18 |                  |                     |                                                                |       |
| 19 |                  |                     | which the present article is based                             |       |
| 20 |                  |                     |                                                                |       |
| 21 |                  |                     |                                                                |       |

22 The STROBE checklist is distributed under the terms of the Creative Commons Attribution License  
23  
24 CC-BY. This checklist can be completed online using <https://www.goodreports.org/>, a tool made by  
25  
26 the [EQUATOR Network](#) in collaboration with [Penelope.ai](#)  
27  
28  
29  
30  
31  
32  
33  
34  
35  
36  
37  
38  
39  
40  
41  
42  
43  
44  
45  
46  
47  
48  
49  
50  
51  
52  
53  
54  
55  
56  
57  
58  
59  
60

# BMJ Open

## Risk of ischemic stroke in patients with migraine: A longitudinal follow-up study using a national sample cohort in Korea

|                                 |                                                                                                                                                                                                                                                                                                                                                                    |
|---------------------------------|--------------------------------------------------------------------------------------------------------------------------------------------------------------------------------------------------------------------------------------------------------------------------------------------------------------------------------------------------------------------|
| Journal:                        | <i>BMJ Open</i>                                                                                                                                                                                                                                                                                                                                                    |
| Manuscript ID                   | bmjopen-2018-027701.R2                                                                                                                                                                                                                                                                                                                                             |
| Article Type:                   | Research                                                                                                                                                                                                                                                                                                                                                           |
| Date Submitted by the Author:   | 30-Jan-2019                                                                                                                                                                                                                                                                                                                                                        |
| Complete List of Authors:       | Lee, Sang-Yeon; Seoul National University Hospital, Otorhinolaryngology-Head and Neck Surgery<br>Lim, Jae-Sung; Hallym University Sacred Heart Hospital, Neurology<br>Oh, Dong Jun; Asan Medical Center, University of Ulsan College of Medicine<br>Kong, Il Gyu; Hallym University College of Medicine, Otorhinolaryngology<br>Choi, Hyo Geun; Hallym University, |
| <b>Primary Subject Heading</b>: | Neurology                                                                                                                                                                                                                                                                                                                                                          |
| Secondary Subject Heading:      | Epidemiology, Neurology, Ear, nose and throat/otolaryngology                                                                                                                                                                                                                                                                                                       |
| Keywords:                       | EPIDEMIOLOGY, Migraine < NEUROLOGY, Stroke < NEUROLOGY                                                                                                                                                                                                                                                                                                             |
|                                 |                                                                                                                                                                                                                                                                                                                                                                    |

SCHOLARONE™  
Manuscripts



1  
2  
3  
4 1 **Risk of ischemic stroke in patients with migraine: A**  
5  
6  
7 2 **longitudinal follow-up study using a national sample**  
8  
9  
10 3 **cohort in Korea**  
11  
12  
13  
14 4

15  
16 5 Sang-Yeon Lee<sup>1</sup>, Jae-Sung Lim<sup>2</sup>, Dong Jun Oh<sup>3</sup>, Il Gyu Kong<sup>4</sup>, Hyo Geun Choi<sup>4\*</sup>  
17  
18 6

19  
20 7 <sup>1</sup>Department of Otorhinolaryngology-Head and Neck Surgery, Seoul National University  
21  
22 8 Hospital, Seoul National University College of Medicine, Seoul, South Korea  
23  
24

25 9 <sup>2</sup>Department of Neurology, Hallym University College of Medicine, Anyang, Korea  
26

27 10 <sup>3</sup>Department of Internal Medicine, Asan Medical Center, University of Ulsan College of  
28  
29 11 Medicine, Seoul  
30  
31

32 12 <sup>4</sup>Department of Laboratory Medicine, Hallym University College of Medicine, Anyang,  
33  
34 13 Korea  
35  
36

37 14  
38  
39 15 Corresponding author: Hyo Geun Choi  
40

41 16 Department of Otorhinolaryngology-Head & Neck Surgery, Hallym University Sacred Heart  
42

43 17 Hospital, 22, Gwanpyeong-ro 170beon-gil, Dongan-gu, Anyang-si, Gyeonggi-do, 14068  
44

45 18 Republic of Korea  
46  
47

48 19 Tel: 82-31-380-3849  
49

50 20 Fax: 82-31-386-3860  
51

52 21 Email: [pupen@naver.com](mailto:pupen@naver.com)  
53  
54

55 22  
56  
57 23 Word Count: 3226  
58  
59  
60

1  
2  
3 **24 Abstract**  
4

5 **25 Objective:** Accumulating evidence has supported the association between migraine and  
6  
7  
8 **26** stroke, but the causative association remains unclear. We aimed to investigate the risks of  
9  
10  
11 **27** different types of stroke in patients with migraine.

12 **28 Design:** A longitudinal follow-up study

13  
14 **29 Setting:** Data collected from a national cohort between 2002 and 2013 by the Korean Health  
15  
16  
17 **30** Insurance Review and Assessment

18  
19 **31 Participants:** We extracted the data from patients with migraine (n = 41,585) and 1:4  
20  
21  
22 **32** matched controls (n = 166,340) and analyzed the occurrence of ischemic and hemorrhagic  
23  
24 **33** strokes. The migraine group included participants treated for migraine (ICD-10: G43)  $\geq$  2  
25  
26 **34** times. Hemorrhagic stroke (I60-I62) and ischemic stroke (I63) were determined based on the  
27  
28 **35** admission histories. The crude and adjusted hazard ratios (HRs) were calculated using Cox  
29  
30 **36** proportional hazard models, and the 95% confidence intervals (CIs) were determined.  
31  
32  
33 **37** Subgroup analyses stratified by age and sex were also performed.

34  
35 **38 Results:** Higher rates of ischemic stroke were observed in the migraine group (2.3%  
36  
37  
38 [964/41,585]) than in the control group (2.0% [3,294/166,340],  $P < 0.001$ ). The adjusted HR  
39  
40 **40** for ischemic stroke was 1.18 (95% CI = 1.10-1.26) in the migraine group ( $P < 0.001$ ).  
41  
42 **41** Compared with control subjects, participants who reported migraine with aura and migraine  
43  
44 **42** without aura had increased adjusted HRs of 1.44 (95% CI = 1.09-1.89) and 1.15 (95% CI =  
45  
46 **43** 1.06-1.24), respectively, for ischemic stroke, but no increased risk of hemorrhagic stroke. In  
47  
48 **44** our subgroup analysis, a strong association between migraine and ischemic stroke was  
49  
50  
51 **45** observed in young patients, specifically young women. The contribution of migraine to the  
52  
53  
54 **46** occurrence of ischemic stroke was also observed in middle-aged women and old women  
55  
56  
57  
58  
59  
60

1  
2  
3 47 (each  $P < 0.05$ ). The risk of hemorrhagic stroke did not reach statistical significance in any  
4  
5 48 age group.

6  
7  
8 49 **Conclusion:** Migraine is associated with an increased risk of ischemic stroke, but not  
9  
10 50 hemorrhagic stroke.

11  
12 51 Keywords: migraine, stroke, cohort study, Korea

13  
14  
15 52

### 16 17 53 **STRENGTHS AND LIMITATIONS OF THIS STUDY**

18  
19 54 1. The strengths of the present study particularly result from the large cohort based on a  
20  
21 55 complete, national patient sample and the long follow-up period.

22  
23  
24 56 2. We designed a cohort study to evaluate the risks of different types of stroke in migraineurs.

25  
26 57 3. Migraine should be considered in assessments of the risk of ischemic stroke, particularly in  
27  
28 58 young women.

29  
30 59 4. Confounders linking migraine to stroke, such as cigarette smoking, obesity, and  
31  
32 60 prescription information, were not available in the present cohort study based on claim data.

33  
34  
35 61

### 36 37 62 **Introduction**

38  
39  
40 63 Migraine is a common neurovascular disorder characterized by recurrent disabling episodes  
41  
42 64 of headache, most often unilateral headache. The headache is often accompanied by visual or  
43  
44 65 sensory symptoms, namely, aura.<sup>1</sup> The annual prevalence of migraine is approximately 8–  
45  
46 66 15% worldwide,<sup>2,3</sup> and in Korea, the estimated incidence is 6.1%.<sup>4</sup> Migraine appears to  
47  
48 67 present at a relatively young age ( $< 45$  years); it is more prevalent in women than men, with a  
49  
50 68 prevalence  $> 25\%$  in the 35–39-year-old female population worldwide.<sup>1</sup> The inclusion of  
51  
52 69 migraine as an independent risk factor for cardiovascular events has been debated for many  
53  
54 70 years, but it is an established risk factor for ischemic stroke.<sup>5</sup>

1  
2  
3 71 Stroke is a cerebrovascular condition characterized by limited blood flow to the brain due  
4  
5 72 to a blockage or rupture in the cerebrovascular system.<sup>6</sup> Stroke is responsible for  
6  
7 73 approximately 700,000 deaths annually in the Western world.<sup>7</sup> In Korea, the estimated stroke  
8  
9 74 incidence is approximately 795,000 in people aged  $\geq 30$  years.<sup>8</sup> More than 80% of stroke  
10  
11 75 cases are ischemic stroke, and the remaining cases are hemorrhagic stroke; ischemic and  
12  
13 76 hemorrhagic strokes differ with regard to risk factors, genetic predisposition, and mortality  
14  
15 77 rates.<sup>9 10</sup>

16  
17  
18  
19 78 To date, several underlying physiological mechanisms have been suggested to explain the  
20  
21 79 association between migraine and stroke. The risk factors for stroke in migraineurs have been  
22  
23 80 widely evaluated, and common comorbidities, including hypertension, obesity, dyslipidemia,  
24  
25 81 and smoking, were validated.<sup>11</sup> In addition, specific genetic etiologies associated with  
26  
27 82 vasculopathy can manifest in both patients suffering from migraine and stroke.<sup>12</sup> A recent  
28  
29 83 investigation employing a mutant mouse model of migraine also indicated that shared genetic  
30  
31 84 risk factors rendered the brain more vulnerable to ischemic stroke.<sup>13</sup>

32  
33  
34  
35 85 Moreover, migraine itself carries an increased risk of ischemic stroke. Migraine is  
36  
37 86 associated with an increased risk of perioperative ischemic stroke in a large cohort of surgical  
38  
39 87 patients, suggesting that migraine should be included in the perioperative risk assessment.<sup>14</sup>  
40  
41 88 Recently, a population-based case-control study in Taiwan reported an association between  
42  
43 89 migraine and ischemic stroke (adjusted hazard ratio [HR]: 1.24, confidence interval [CI]:  
44  
45 90 1.12–1.38).<sup>3</sup> Similarly, an increased risk of ischemic stroke has been consistently observed in  
46  
47 91 migraineurs, especially in those diagnosed with migraine with aura.<sup>3 15-18</sup> Furthermore,  
48  
49 92 accumulating evidence has supported the association between migraine and hemorrhagic  
50  
51 93 stroke,<sup>19 20</sup> but the causative association currently remains unclear.

1  
2  
3 94 Given the differences in the natures of hemorrhagic stroke and ischemic stroke in  
4  
5 95 patients, including risk factors and genetic predispositions,<sup>9 10</sup> we hypothesized that the  
6  
7  
8 96 contributions of migraine to an increased risk of stroke differ according to the stroke type.  
9  
10 97 Thus, stroke types should be analyzed separately. Additionally, stroke is a leading cause of  
11  
12 98 mortality; therefore, validation of the association between migraine and stroke may facilitate  
13  
14 99 treatment and prognosis in these cases. Here, using a national Korean population-based  
15  
16  
17 100 sample cohort, we examined the associations between migraine and different types of stroke.  
18  
19  
20 101

## 21 102 **Materials and Methods**

### 22 103 **Study population and data collection**

23  
24  
25  
26 104 The ethics committee of Hallym University (2014-I148) approved the use of these data. The  
27  
28 105 Institutional Review Board exempted the requirement for written informed consent.

29  
30 106 This national cohort study used data from the Korean National Health Insurance  
31  
32  
33 107 Service-National Sample Cohort (NHIS-NSC). The Korean NHIS selects samples directly  
34  
35 108 from the entire population database to prevent nonsampling errors. Approximately 2% of the  
36  
37 109 samples (one million) were selected from the entire Korean population (50 million). The  
38  
39 110 selected data were classified into 1,476 levels (age [18 categories], sex [2 categories], and  
40  
41 111 income level [41 categories]) using randomized, stratified, systematic sampling methods via  
42  
43 112 proportional allocation to represent the entire population. A previous study verified the  
44  
45 113 appropriateness of the sample after data selection.<sup>21</sup> The National Health Insurance Sharing  
46  
47 114 Service provides a detailed description of the methods used to perform these procedures.<sup>22</sup>  
48  
49 115 This cohort database included (i) personal information, (ii) health insurance claim codes  
50  
51  
52 116 (procedures and prescriptions), (iii) diagnostic codes based on the International Classification  
53  
54  
55 117 of Disease-10 (ICD-10), (iv) death records from the Korean National Statistical Office (using  
56  
57  
58  
59  
60

1  
2  
3 118 the Korean Standard Classification of disease), (v) socioeconomic data (residence and  
4  
5 119 income), and (vi) medical examination data for each participant from 2002 to 2013.

6  
7  
8 120 All Korean citizens are recognized by a 13-digit resident registration number from birth  
9  
10 121 to death. Therefore, exact population statistics have been determined using this database. All  
11  
12 122 Koreans are required to enroll in the NHIS. All Korean hospitals and clinics use the 13-digit  
13  
14 123 resident registration number to register individual patients in the medical insurance system.  
15  
16 124 Therefore, the risk of overlapping medical records is minimal, even if a patient moves from  
17  
18 125 one place to another. All medical treatments in Korea are tracked without exception using the  
19  
20 126 Health Insurance Review & Assessment (HIRA) system. In Korea, the law states that a notice  
21  
22 127 of death must be provided to an administrative entity before a funeral can be held. Medical  
23  
24 128 doctors record the date and cause of death on a death certificate.  
25  
26  
27  
28  
29

### 30 130 **Patients and public involvement**

31  
32  
33 131 No patients or public were involved in the present study.  
34  
35  
36

### 37 133 **Participant Selection**

38  
39  
40 134 Of the 1,125,691 patients with 114,369,638 medical claim codes, participants diagnosed with  
41  
42 135 migraine (ICD-10: G43) were included. Among these participants, those who were treated  $\geq$   
43  
44 136 2 times ( $n = 45,587$ ) were selected. The participants were followed for 12 years.

45  
46  
47 137 The history of admission for hemorrhagic stroke (I60: Subarachnoid hemorrhage, I61:  
48  
49 138 Intracerebral hemorrhage, and I62: Other nontraumatic intracranial hemorrhage) and  
50  
51 139 ischemic stroke (I63: Cerebral infarction) was identified using ICD-10 codes. We selected the  
52  
53 140 participants who were treated  $\geq 1$  time. These methods were used in other studies evaluating  
54  
55  
56 141 the incidence of stroke in Korea.<sup>8 23</sup>  
57  
58  
59  
60

1  
2  
3 142 The participants with migraine were matched 1:4 with participants (control group) who  
4  
5 143 had never been diagnosed with a migraine from 2002 through 2013 in this cohort. The control  
6  
7 144 group was selected from the total population (n = 1,080,104). The matches were processed  
8  
9 145 for age, group, sex, income group, region of residence, and past medical histories (age, sex,  
10  
11 146 income, region of residence, hypertension, diabetes, and dyslipidemia histories). We sorted  
12  
13 147 the participants in the control group using a random number order and then selected them  
14  
15 148 from top to bottom to prevent selection bias when selecting the matched control participants.  
16  
17 149 We assumed that the matched control participants were enrolled at the same time as each  
18  
19 150 matched participant with migraine (index date). Therefore, control group members who died  
20  
21 151 before the index date were excluded. In both the migraine and control groups, participants  
22  
23 152 with histories of hemorrhagic or ischemic stroke before the index date were excluded. In the  
24  
25 153 migraine group, 438 participants were excluded. The participants with migraine for whom we  
26  
27 154 were unable to identify sufficient numbers of matching participants were excluded (n = 185).  
28  
29 155 We excluded participants aged less than 20 years (n = 3,379). Finally, 1:4 matching resulted  
30  
31 156 in the inclusion of 41,585 participants with migraine (migraine with aura = 3,458, migraine  
32  
33 157 without aura = 38,127) and 166,340 control participants (Fig. 1).  
34  
35  
36  
37  
38  
39  
40  
41

158

## 159 **Variables**

160 The age groups were classified using 5-year intervals: 20-24, 25-29, 30-34..., and 85+ years  
161 old. Fourteen age groups were designated. The income groups were initially divided into 41  
162 classes (one health aid class, 20 self-employment health insurance classes, and 20  
163 employment health insurance classes). These groups were recategorized into 11 classes (class  
164 1 [lowest income]–class 11 [highest income]). The region of residence was divided into 16  
165 areas according to administrative district. These regions were regrouped into urban (Seoul,

1  
2  
3 166 Busan, Daegu, Incheon, Gwangju, Daejeon, and Ulsan) and rural (Gyeonggi, Gangwon,  
4  
5 167 Chungcheongbuk, Chungcheongnam, Jeollabuk, Jeollanam, Gyeongsangbuk,  
6  
7 168 Gyeongsangnam, and Jeju) areas. The past medical histories of the participants were  
8  
9  
10 169 evaluated using ICD-10 codes. For an accurate diagnosis, hypertension (I10 and I15),  
11  
12 170 diabetes (E10-E14), and dyslipidemia (E78) were recorded if the participants were treated  $\geq 2$   
13  
14 171 times. Using the Charlson Comorbidity Index, we selected some of confounders that might  
15  
16 172 affect the association between migraine and stroke as confounders based on literature review.  
17  
18 173 We performed the analysis with added variables, including congestive heart failure,<sup>24</sup>  
19  
20 174 myocardial infarction,<sup>25</sup> peripheral vascular disease,<sup>26</sup> pulmonary disease,<sup>27</sup> liver disease,<sup>28</sup>  
21  
22 175 and depression histories.<sup>29 30</sup> Thus, the new model was adjusted for age, sex, income, region  
23  
24 176 of residence, hypertension, diabetes, dyslipidemia, congestive heart failure, myocardial  
25  
26 177 infarction, peripheral vascular disease, pulmonary disease, liver disease, and depression  
27  
28 178 histories.

179

### 180 **Statistical Analyses**

181 Chi-square tests were used to compare the general characteristics between the migraine and  
182 control groups. For the analysis of the HRs of migraine for hemorrhagic stroke and ischemic  
183 stroke, Cox proportional hazard models were used, and 95% CIs were calculated. In these  
184 analyses, crude (simple) and adjusted (age, sex, income, region of residence, hypertension,  
185 diabetes, dyslipidemia, congestive heart failure, myocardial infarction, peripheral vascular  
186 disease, pulmonary disease, liver disease, and depression histories) models were used. For the  
187 subgroup analysis, we stratified the participants by age and sex (20–39 years old, 40–59 years  
188 old, 60+ years old; men and women). Two-tailed analyses were conducted, and P values less



189 than 0.05 were considered significant. The results were statistically analyzed using SPSS v.  
190 21.0 software (IBM, Armonk, NY, USA).

191

## 192 **Results**

193 The mean follow-up period was 80.9 (standard deviation [SD] = 41.6) months for patients  
194 with migraine and 80.9 (SD = 41.6) months for controls. The rates of hemorrhagic stroke  
195 were similar in the migraine group (0.7% [295/41,585]) and the control group (0.7%  
196 [1,113/166,340],  $P = 0.370$ , Table 1). Higher rates of ischemic stroke were observed in the  
197 migraine group (2.3% [964/41,585]) than in the control group (2.0% [3,294/166,340],  $P <$   
198 0.001). The general characteristics (age, sex, income, region of residence, hypertension,  
199 diabetes, and dyslipidemia histories) of participants were the same due to the matching  
200 protocol ( $P = 1.000$ ).

201

202 **Table 1** General characteristics of the participants

| Characteristics | Total participants |                | P-value |
|-----------------|--------------------|----------------|---------|
|                 | Migraine (n, %)    | Control (n, %) |         |
| Age (years)     |                    |                | 1.000   |
| 20-24           | 1,994 (4.8)        | 7,976 (4.8)    |         |
| 25-29           | 2,649 (6.4)        | 10,596 (6.4)   |         |
| 30-34           | 3,640 (8.8)        | 14,560 (8.8)   |         |
| 35-39           | 4,309 (10.4)       | 17,236 (10.4)  |         |
| 40-44           | 4,859 (11.7)       | 19,436 (11.7)  |         |
| 45-49           | 5,187 (12.5)       | 20,748 (12.5)  |         |
| 50-54           | 4,512 (10.9)       | 18,048 (10.9)  |         |

|                     |               |                |       |
|---------------------|---------------|----------------|-------|
| 55-59               | 3,508 (8.4)   | 14,032 (8.4)   |       |
| 60-64               | 3,209 (7.7)   | 12,836 (7.7)   |       |
| 65-69               | 3,049 (7.3)   | 12,196 (7.3)   |       |
| 70-74               | 2,328 (5.6)   | 9,312 (5.6)    |       |
| 75-79               | 1,423 (3.4)   | 5,692 (3.4)    |       |
| 80-84               | 651 (1.6)     | 2,604 (1.6)    |       |
| 85+                 | 267 (0.6)     | 1,068 (0.6)    |       |
| Sex                 |               |                | 1.000 |
| Male                | 10,476 (25.2) | 41,904 (25.2)  |       |
| Female              | 31,109 (74.8) | 124,436 (74.8) |       |
| Income              |               |                | 1.000 |
| 1 (lowest)          | 837 (2.0)     | 3,348 (2.0)    |       |
| 2                   | 3,170 (7.6)   | 12,680 (7.6)   |       |
| 3                   | 3,004 (7.2)   | 12,016 (7.2)   |       |
| 4                   | 3,131 (7.5)   | 12,524 (7.5)   |       |
| 5                   | 3,345 (8.0)   | 13,380 (8.0)   |       |
| 6                   | 3,615 (8.7)   | 14,460 (8.7)   |       |
| 7                   | 3,908 (9.4)   | 15,632 (9.4)   |       |
| 8                   | 4,411 (10.6)  | 17,644 (10.6)  |       |
| 9                   | 4,908 (11.8)  | 19,632 (11.8)  |       |
| 10                  | 5,456 (13.1)  | 21,824 (13.1)  |       |
| 11 (highest)        | 5,800 (13.9)  | 23,200 (13.9)  |       |
| Region of residence |               |                | 1.000 |
| Urban               | 17,959 (43.2) | 71,836 (43.2)  |       |

|                             |               |               |          |
|-----------------------------|---------------|---------------|----------|
| Rural                       | 23,626 (56.8) | 94,504 (56.8) |          |
| Hypertension                | 16,209 (39.0) | 64,836 (39.0) | 1.000    |
| Diabetes                    | 7,261 (17.5)  | 29,044 (17.5) | 1.000    |
| Dyslipidemia                | 12,837 (30.9) | 51,348 (30.9) | 1.000    |
| Congestive heart failure    | 2,030 (4.9)   | 6,761 (4.1)   | < 0.001* |
| Myocardial infarction       | 913 (2.2)     | 3,330 (2.0)   | 0.013*   |
| Peripheral vascular disease | 7,942 (19.1)  | 20,217 (12.2) | < 0.001* |
| Pulmonary disease           | 29,540 (71.0) | 94,811 (57.0) | < 0.001* |
| Liver disease               | 5,087 (12.2)  | 15,317 (9.2)  | < 0.001* |
| Depression                  | 7,808 (18.8)  | 15,269 (9.2)  | < 0.001* |
| Hemorrhagic stroke          | 295 (0.7)     | 1,113 (0.7)   | 0.370    |
| Ischemic stroke             | 964 (2.3)     | 3,294 (2.0)   | < 0.001* |

\*Chi-square test. Differences were considered significant at  $P < 0.05$ .

The crude and adjusted HRs for hemorrhagic stroke were 1.06 (95% CI = 0.93–1.21,  $P = 0.369$ ) and 1.10 (95% CI = 0.96–1.25,  $P = 0.172$ ), respectively, in the migraine group (Table 2). The crude and adjusted HRs for ischemic stroke were 1.17 (95% CI = 1.09–1.26) and 1.18 (95% CI = 1.08–1.25), respectively, in the migraine group (each  $P < 0.001$ ).

213 **Table 2** Crude and adjusted hazard ratios (95% confidence interval) of migraine for hemorrhagic stroke and ischemic stroke

| Characteristics | Hemorrhagic stroke |         |                  |         | Ischemic stroke  |          |                  |          |
|-----------------|--------------------|---------|------------------|---------|------------------|----------|------------------|----------|
|                 | Crude              | P-value | Adjusted†        | P-value | Crude            | P-value  | Adjusted†        | P-value  |
| Migraine        |                    | 0.369   |                  | 0.172   |                  | < 0.001* |                  | < 0.001* |
| Yes             | 1.06 (0.93-1.21)   |         | 1.10 (0.96-1.25) |         | 1.17 (1.09-1.26) |          | 1.17 (1.08-1.25) |          |
| No              | 1.00               |         | 1.00             |         | 1.00             |          | 1.00             |          |

214

215 \* Cox proportional hazard regression model; differences were considered significant at  $P < 0.05$ .

216 † Model adjusted for age, sex, income, region of residence, hypertension, diabetes, dyslipidemia, congestive heart failure, myocardial infarction,  
 217 peripheral vascular disease, pulmonary disease, liver disease, and depression histories.

1  
2  
3 218 In the subgroup analyses, none of the crude and adjusted HRs for hemorrhagic stroke  
4  
5 219 reached statistical significance (Table 3). Among the patients with ischemic stroke, young  
6  
7 220 women, middle-aged women, and old women showed statistically significant differences  
8  
9 221 (each  $P < 0.05$ ). The significant adjusted HRs were 2.31 (95% CI = 1.39–3.82) in young  
10  
11 222 women (20-39 years old); 1.32 (95% CI = 1.08–1.61) in middle-aged women (40-59 years  
12  
13 223 old); and 1.18 (95% CI = 1.06–1.30) in  $\geq 60$ -year-old women. Moreover, descriptive  
14  
15 224 statistical analyses of the migraine prevalence and ischemic stroke occurrence within  
16  
17 225 subgroups revealed statistically significant differences in young men, young women, middle-  
18  
19 226 aged women, old men, and old women. On the other hand, the risk of hemorrhagic stroke in  
20  
21 227 patients with migraine was not significantly different from the control group (Supplement  
22  
23 228 table 1).  
24  
25  
26  
27  
28  
29  
30  
31  
32  
33  
34  
35  
36  
37  
38  
39  
40  
41  
42  
43  
44  
45  
46  
47  
48  
49  
50  
51  
52  
53  
54  
55  
56  
57  
58  
59  
60

238 **Table 3** Subgroup analysis of crude and adjusted hazard ratios (95% confidence interval) of migraine for hemorrhagic stroke and ischemic  
 239 stroke

| Characteristics                                      | Hemorrhagic stroke |         |                  |         | Ischemic stroke  |          |                  |         |
|------------------------------------------------------|--------------------|---------|------------------|---------|------------------|----------|------------------|---------|
|                                                      | Crude              | P-value | Adjusted†        | P-value | Crude            | P-value  | Adjusted†        | P-value |
| <b>Young men (20-39 years old, n = 15,550)</b>       |                    |         |                  |         |                  |          |                  |         |
| Migraine                                             |                    | 0.158   |                  | 0.330   |                  | 0.017*   |                  | 0.107   |
| Yes                                                  | 1.56 (0.84-2.89)   |         | 1.37 (0.73-2.59) |         | 2.15 (1.15-4.02) |          | 1.72 (0.89-3.32) |         |
| No                                                   | 1.00               |         | 1.00             |         | 1.00             |          | 1.00             |         |
| <b>Young women (20-39 years old, n = 47,410)</b>     |                    |         |                  |         |                  |          |                  |         |
| Migraine                                             |                    | 0.726   |                  | 0.879   |                  | < 0.001* |                  | 0.001*  |
| Yes                                                  | 1.10 (0.64-1.92)   |         | 1.05 (0.59-1.84) |         | 2.54 (1.55-4.15) |          | 2.31 (1.39-3.82) |         |
| No                                                   | 1.00               |         | 1.00             |         | 1.00             |          | 1.00             |         |
| <b>Middle-aged men (40-59 years old, n = 22,090)</b> |                    |         |                  |         |                  |          |                  |         |
| Migraine                                             |                    | 0.721   |                  | 0.668   |                  | 0.565    |                  | 0.418   |
| Yes                                                  | 1.07 (0.73-1.56)   |         | 1.09 (0.74-1.61) |         | 0.93 (0.71-1.21) |          | 0.89 (0.68-1.17) |         |

1  
2  
3  
4  
5  
6  
7  
8  
9  
10  
11  
12  
13  
14  
15  
16  
17  
18  
19  
20  
21  
22  
23  
24  
25  
26  
27  
28  
29  
30  
31  
32

---

|                                                        |                  |                  |                  |                  |
|--------------------------------------------------------|------------------|------------------|------------------|------------------|
| No                                                     | 1.00             | 1.00             | 1.00             | 1.00             |
| <b>Middle-aged women (40-59 years old, n = 68,240)</b> |                  |                  |                  |                  |
| Migraine                                               | 0.582            | 0.388            | 0.002*           | 0.006*           |
| Yes                                                    | 1.07 (0.84-1.38) | 1.12 (0.87-1.44) | 1.35 (1.12-1.64) | 1.32 (1.08-1.61) |
| No                                                     | 1.00             | 1.00             | 1.00             | 1.00             |
| <b>Old men (≥ 60 years old, n = 14,740)</b>            |                  |                  |                  |                  |
| Migraine                                               | 0.115            | 0.068            | 0.275            | 0.353            |
| Yes                                                    | 1.29 (0.94-1.78) | 1.36 (0.98-1.88) | 1.09 (0.93-1.27) | 1.08 (0.92-1.26) |
| No                                                     | 1.00             | 1.00             | 1.00             | 1.00             |
| <b>Old women (≥ 60 years old, n = 39,895)</b>          |                  |                  |                  |                  |
| Migraine                                               | 0.462            | 0.757            | 0.002*           | 0.002*           |
| Yes                                                    | 0.92 (0.75-1.14) | 0.97 (0.78-1.20) | 1.17 (1.06-1.29) | 1.18 (1.06-1.30) |
| No                                                     | 1.00             | 1.00             | 1.00             | 1.00             |

---

240

241 \* Cox proportional hazard regression model; differences were considered significant at P < 0.05.

43  
44  
45  
46

1  
2  
3 242 † Model adjusted for age, sex, income, region of residence, hypertension, diabetes, dyslipidemia, congestive heart failure, myocardial infarction,  
4  
5 243 peripheral vascular disease, pulmonary disease, liver disease, and depression histories.  
6  
7  
8  
9  
10  
11  
12  
13  
14  
15  
16  
17  
18  
19  
20  
21  
22  
23  
24  
25  
26  
27  
28  
29  
30  
31  
32  
33  
34  
35  
36  
37  
38  
39  
40  
41  
42  
43  
44  
45  
46

For peer review only



1  
2  
3 244 Compared with the control group, participants who reported migraine with aura and  
4  
5 245 migraine without aura had increased adjusted HRs of 1.44 (95% CI = 1.09-1.89) and 1.15  
6  
7 246 (95% CI = 1.06-1.24) for ischemic stroke, respectively, but no increased risk of hemorrhagic  
8  
9  
10 247 stroke (Table 4).

11  
12 248

13  
14 249

15  
16 250

17  
18 251

19  
20 252

21  
22 253

23  
24 254

25  
26 255

27  
28 256

29  
30 257

31  
32 258

33  
34 259

35  
36 260

37  
38 261

39  
40 262

41  
42 263

43  
44 264

45  
46 265

47  
48 266

49  
50 267

268 **Table 4** Subgroup analysis of crude and adjusted hazard ratios (95% confidence interval) of migraine for hemorrhagic stroke and ischemic  
 269 stroke

| Characteristics                            | Hemorrhagic stroke |         |                  |         | Ischemic stroke  |          |                  |          |
|--------------------------------------------|--------------------|---------|------------------|---------|------------------|----------|------------------|----------|
|                                            | Crude              | P-value | Adjusted†        | P-value | Crude            | P-value  | Adjusted†        | P-value  |
| <b>Migraine with Aura (n = 17,290)</b>     |                    |         |                  |         |                  |          |                  |          |
| Migraine                                   |                    | 0.531   |                  | 0.506   |                  | 0.006*   |                  | 0.009*   |
| Yes                                        | 1.17 (0.72-1.90)   |         | 1.19 (0.72-1.96) |         | 1.45 (1.11-1.88) |          | 1.44 (1.09-1.89) |          |
| No                                         | 1.00               |         | 1.00             |         | 1.00             |          | 1.00             |          |
| <b>Migraine without Aura (n = 190,635)</b> |                    |         |                  |         |                  |          |                  |          |
| Migraine                                   |                    | 0.446   |                  | 0.213   |                  | < 0.001* |                  | < 0.001* |
| Yes                                        | 1.05 (0.92-1.20)   |         | 1.09 (0.95-1.25) |         | 1.16 (1.07-1.24) |          | 1.15 (1.06-1.24) |          |
| No                                         | 1.00               |         | 1.00             |         | 1.00             |          | 1.00             |          |

270  
 271 \* Cox proportional hazard regression model; differences were considered significant at P < 0.05.

272 † Model adjusted for age, sex, income, region of residence, hypertension, diabetes, dyslipidemia, congestive heart failure, myocardial infarction,  
 273 peripheral vascular disease, pulmonary disease, liver disease, and depression histories.

## 274 **Discussion**

275 Migraine appeared to increase the risk of ischemic stroke, but not hemorrhagic stroke. The  
276 risk of ischemic stroke was 1.18-fold greater in the patients with migraine than in the  
277 matched control subjects, even after adjustment for confounding factors. In the subgroup  
278 analyses stratified by age and sex, significant correlations with ischemic stroke were  
279 primarily observed in young women, middle-aged women, and old women. In contrast, the  
280 risk of hemorrhagic stroke was similar in patients with migraine and the matched control  
281 patients.

282 Migraine, particularly migraine with aura, is an established risk factor for ischemic  
283 stroke. In this study, compared with the control group, participants who reported migraine  
284 with aura had an increased adjusted HR of 1.44 (95% CI = 1.09-1.89) for ischemic stroke.  
285 Migraine with aura particularly increases the risk of ischemic stroke, based on the results of  
286 large population-based cohort studies and meta-analyses.<sup>3 15-18</sup> Cortical spreading depression  
287 (CSD) is a self-propagating wave of depolarization across the cerebral cortex at a slow  
288 velocity of 3 to 5 mm/min.<sup>31</sup> CSD has been implicated in migraine with aura, which plays a  
289 critical role in the pathophysiology of ischemic stroke. In an experimental study, CSD altered  
290 the tone of resistance vessels, causing hypoperfusion in tissues at risk for progressive  
291 damage, namely, cortical spreading ischemia.<sup>32</sup> In addition, the inflammatory cascade of the  
292 neurovascular system, which is characterized by endothelial dysfunction and coagulation  
293 abnormalities, may contribute to the development of ischemic stroke. In the aura phase, the  
294 endothelium activates coagulation and thrombosis, which are mediated by inflammatory  
295 cytokines and endothelial biomarkers.<sup>33 34</sup> Moreover, specific genetic etiologies, such as  
296 Factor V Leiden G 619 1A, prothrombin G20210A, and familial hemiplegic migraine type 1,  
297 have been reported in patients diagnosed with migraine with aura. These shared genetic

1  
2  
3 298 factors may precipitate the susceptibility to CSD, which may explain the association between  
4  
5 299 migraine and stroke.<sup>35</sup>  
6

7  
8 300 A growing body of evidence regarding the increased risk of ischemic stroke in patients  
9  
10 301 with migraine without aura. Consistent with the findings from patients reporting migraine  
11  
12 302 with aura, participants who reported migraine without aura had an increased adjusted HR of  
13  
14 303 1.15 (95% CI = 1.06-1.24) for ischemic stroke compared with the control group. Notably, a  
15  
16 304 significant association was observed in cases of ischemic stroke resulting from cervical artery  
17  
18 305 dissection.<sup>36</sup> In addition, genetic overlaps among subjects with migraine without aura, large  
19  
20 306 artery stroke, and cardio-embolic stroke have been identified.<sup>37</sup> However, strong evidence has  
21  
22 307 been not reported. A recent large population-based study reported an statistically insignificant  
23  
24 308 risk of ischemic stroke in patients with migraine without aura but an increased risk in patients  
25  
26 309 with migraine with aura.<sup>3</sup> The study suggested that the difference may be due to changes in  
27  
28 310 the lipid profile, the susceptibility to thrombosis, and genetic predisposition.<sup>3</sup> A meta-analysis  
29  
30 311 did not identify a significant association between migraine without aura and ischemic  
31  
32 312 stroke.<sup>18</sup> In the present study, we did not differentiate between migraine subtypes, such as  
33  
34 313 migraine with and without aura, when analyzing the risk of stroke. Therefore, the risk of  
35  
36 314 ischemic stroke in participants with migraine was relatively low but statistically significant  
37  
38 315 compared to other studies investigating specific conditions.  
39

40  
41 316 Notably, in the present study, migraine was not associated with an increased risk of  
42  
43 317 hemorrhagic stroke. In contrast to the findings from the present study, a recent meta-analysis  
44  
45 318 based on 4 case-control and 4 cohort studies concluded that migraine may increase the risk of  
46  
47 319 hemorrhagic stroke.<sup>20</sup> However, a recent large population-based case-control study did not  
48  
49 320 show an association with different types of hemorrhagic stroke, including intracerebral  
50  
51 321 hemorrhage and subarachnoid hemorrhage.<sup>38</sup> Migraine was an independent risk factor for  
52  
53  
54  
55  
56  
57  
58  
59  
60

1  
2  
3 322 aneurismal rupture (odds ratio [OR] = 2.4; 95% CI 1.1–5.1) in a case-control study,<sup>39</sup> and  
4  
5 323 even if headache is a premonitory symptom of aneurismal rupture, recall biases might have  
6  
7 324 affected the results of the study. Overall, the relatively small number of hemorrhagic stroke  
8  
9 325 cases might have resulted in decreased statistical power.

10  
11  
12 326 In our subgroup analysis, a strong correlation between migraine and ischemic stroke was  
13  
14 327 observed in young patients, specifically young women (20-39 years old). Based on a  
15  
16 328 consensus statement from the European Headache Federation (EHF),<sup>40</sup> the use of a combined  
17  
18 329 hormonal contraceptive may further increase the risk of ischemic stroke in patients with  
19  
20 330 migraine, specifically migraine with aura, supporting our results. Because the predisposing  
21  
22 331 factors for stroke increase the incidence of ischemic stroke with age,<sup>41</sup> migraine itself rather  
23  
24 332 than other risk factors might be implicated in the increased risk of ischemic stroke. In  
25  
26 333 contrast, a recent large, population-based cohort study in Taiwan with a relatively short  
27  
28 334 follow-up duration of 3.6 years did not show a significant association in the subgroups of  
29  
30 335 women and patients aged < 45 years.<sup>3</sup> This discrepancy might be due to differences in the  
31  
32 336 study design, follow-up duration, and ethnic composition of the study population. Recently, a  
33  
34 337 similar trend for this association was also reported,<sup>3</sup> but it requires further confirmation due  
35  
36 338 to the lack of evidence at present.

37  
38  
39 339 The present study has several strengths. The results of this study are consistent with the  
40  
41 340 findings of our previous studies utilizing the HIRA-NSC.<sup>42-44</sup> We examined a very large,  
42  
43 341 representative, and nationwide population. Because the NHIS data cover all citizens of Korea  
44  
45 342 without exception, no participants were lost during follow-up. The control group was  
46  
47 343 randomly selected and matched based on age, sex, income, region of residence, and medical  
48  
49 344 history to decrease any confounding effects. An adjusted hazard model was used to further  
50  
51 345 minimize the impacts of confounders. Because migraine attacks might be frequently repeated,

1  
2  
3 346 we opted to include patients with migraine who underwent treatment at least twice based on  
4  
5 347 the ICD-10 code to increase the validity of the study [G43]. In a previous study, the  
6  
7 348 prevalence of migraine in Korea was reported to be approximately 6.1%.<sup>4</sup> This value  
8  
9 349 appeared to be slightly higher than the value reported in the present study, which was 3.7%  
10  
11  
12 350 (41,585/1,125,691), based on strict inclusion criteria for migraine. In addition, the patients  
13  
14 351 with migraine were followed for 12 years in the present study. Long study periods enable the  
15  
16 352 recruitment of a large study population and allow researchers to observe and analyze the  
17  
18 353 delayed effects of migraine on stroke.  
19  
20

21 354 However, the present study has certain limitations that should be addressed in future  
22  
23 355 studies. First, we were unable to extract information on stroke subtypes and location from the  
24  
25 356 data used in the present study. The impact of migraine on each type of pathophysiology might  
26  
27 357 vary when considering different functional outcomes, survival, and recurrence according to  
28  
29 358 stroke subtype.<sup>38 45</sup> However, in the present study, the distribution of stroke subtypes was not  
30  
31 359 available. The classification of stroke type can lead to a significantly decreased incidence of  
32  
33 360 each disease. As an insufficient number of cases cause inappropriate comparisons due to  
34  
35 361 lower statistical power, the inclusion of the distribution of stroke subtypes would hamper our  
36  
37 362 ability to draw a clear conclusion from the available data. In particular, the absolute incidence  
38  
39 363 of hemorrhagic stroke is very low in general practice; therefore, most of studies did not  
40  
41 364 provide information about subtypes, such as the presence of an aneurysm, although the  
42  
43 365 association is positive in public health studies.<sup>38</sup> Second, a firm correlation between the  
44  
45 366 frequency of migraine attacks and the risk of stroke has been reported,<sup>46</sup> but we were unable  
46  
47 367 to confirm this correlation using the claim data analyzed in the present study. Similarly, the  
48  
49 368 duration and severity of migraine were inconsistent among the study population. Patients  
50  
51 369 with migraine who had mild complaints may not have received a consultation at the clinic;  
52  
53  
54  
55  
56  
57  
58  
59  
60

1  
2  
3 370 therefore, the impact of migraine on stroke may be underestimated in this study. Third,  
4  
5 371 although this study attempted to include a large, representative patient population and  
6  
7 372 subsequently matched and adjusted for possible confounders, the risk factors for stroke in  
8  
9 373 patients with migraine, such as cigarette smoking, obesity, and migraine-specific drugs, were  
10  
11 374 not available in the insurance database.<sup>11 46</sup> Finally, in the present study, the incidence of  
12  
13 375 migraine was 3.7% (41,585 of 1,125,691 participants) after employing a strict matching  
14  
15 376 protocol. Before matching, the incidence of migraine in Korea was 4.1% (45,587 of  
16  
17 377 1,125,691 participants). This value is consistent with previous cohort study in Korea,  
18  
19 378 indicating that the overall prevalence rate of migraine was 6.1%,<sup>4</sup> despite the use of different  
20  
21 379 study designs. Given the global prevalence of migraine of approximately 8–15%,<sup>2,3</sup> the  
22  
23 380 incidence of migraine in Korea is relatively low because of limited claim data. Only patients  
24  
25 381 with migraine who visited the hospital are recorded. In other words, data are not available for  
26  
27 382 patients with weak migraine symptoms or patients who do not visit a hospital, leading to a  
28  
29 383 lower incidence. Based on a population-based epidemiological study of migraine in Korea,  
30  
31 384 only 24.4% of patients ever consulted a doctor for headache and only 3.3% of patients were  
32  
33 385 prescribed a drug by a doctor.<sup>47</sup>  
34  
35  
36  
37  
38  
39  
40  
41

## 42 387 **Conclusions**

43  
44 388 Based on a large population-based cohort study in Korea, migraine increased the risk of  
45  
46 389 ischemic stroke, but not hemorrhagic stroke. The subgroup of patients at the highest risk of  
47  
48 390 developing ischemic stroke was young women.  
49  
50  
51

52 391

## 53 54 392 **ACKNOWLEDGMENTS**

1  
2  
3 393 We thank the participants and examiners of Korean Health Insurance Review and Assessment  
4  
5 394 for participating in this cohort study and providing the data, respectively.  
6  
7  
8 395

9  
10 396 **DATA SHARING STATEMENT**  
11

12 397 No additional data are available.  
13  
14 398

15  
16  
17 399 **FUNDING STATEMENT**  
18

19 400 This work was supported by the Hallym University Research Fund and in part by a research  
20  
21 401 grant (NRF-2015-R1D1A1A01060860) from the National Research Foundation (NRF) of  
22  
23 402 Korea.  
24  
25

26 403

27  
28 404 **COMPETING INTERESTS STATEMENT**  
29

30 405 None of the authors have competing interests to declare.  
31  
32 406

33  
34  
35 407 **AUTHORS' CONTRIBUTIONS**  
36

37 408 As the first author, SYL wrote the manuscript. DJO and JSL analyzed and interpreted the  
38  
39 409 data. IGK processed the data. HGC conceptualized, wrote, and reviewed the manuscript.  
40  
41 410

42  
43  
44 411 **References**  
45

46 412 1. Charles A. Migraine. *N Engl J Med* 2017;377(6):553-61. doi: 10.1056/NEJMcp1605502  
47  
48 413 2. Lipton RB, Scher AI, Kolodner K, et al. Migraine in the United States: epidemiology and

49  
50 414 patterns of health care use. *Neurology* 2002;58(6):885-94.  
51  
52  
53  
54  
55  
56  
57  
58  
59  
60



- 1  
2  
3 415 3. Peng KP, Chen YT, Fuh JL, et al. Migraine and incidence of ischemic stroke: A  
4  
5 416 nationwide population-based study. *Cephalalgia* 2017;37(4):327-35. doi:  
6  
7 417 10.1177/0333102416642602  
8  
9  
10 418 4. Kim BK, Chu MK, Lee TG, et al. Prevalence and impact of migraine and tension-type  
11  
12 419 headache in Korea. *J Clin Neurol* 2012;8(3):204-11. doi: 10.3988/jcn.2012.8.3.204  
13  
14 420 5. Wood H. Migraine: Migraine - a risk factor for cardiovascular disease? *Nat Rev Neurol*  
15  
16 421 2018;14(4):194-95. doi: 10.1038/nrneurol.2018.18  
17  
18 422 6. Feigin VL, Lawes CM, Bennett DA, et al. Worldwide stroke incidence and early case  
19  
20 423 fatality reported in 56 population-based studies: a systematic review. *The Lancet*  
21  
22 424 *Neurology* 2009;8(4):355-69.  
23  
24 425 7. Ojaghihaghghi S, Vahdati SS, Mikaeilpour A, et al. Comparison of neurological clinical  
25  
26 426 manifestation in patients with hemorrhagic and ischemic stroke. *World journal of*  
27  
28 427 *emergency medicine* 2017;8(1):34.  
29  
30 428 8. Hong KS, Bang OY, Kang DW, et al. Stroke statistics in Korea: part I. Epidemiology and  
31  
32 429 risk factors: a report from the Korean stroke society and clinical research center for  
33  
34 430 stroke. *J Stroke* 2013;15(1):2-20. doi: 10.5853/jos.2013.15.1.2  
35  
36 431 9. Andersen KK, Olsen TS, Dehlendorff C, et al. Hemorrhagic and ischemic strokes  
37  
38 432 compared: stroke severity, mortality, and risk factors. *Stroke* 2009;40(6):2068-72. doi:  
39  
40 433 10.1161/STROKEAHA.108.540112  
41  
42 434 10. Das S, Roy S, Kaul S, et al. E-selectin gene (S128R) polymorphism in hemorrhagic  
43  
44 435 stroke: comparison with ischemic stroke. *Neurosci Lett* 2014;581:125-8. doi:  
45  
46 436 10.1016/j.neulet.2014.08.032  
47  
48 437 11. Gryglas A, Smigiel R. Migraine and Stroke: What's the Link? What to Do? *Curr Neurol*  
49  
50 438 *Neurosci Rep* 2017;17(3):22. doi: 10.1007/s11910-017-0729-y  
51  
52  
53  
54  
55  
56  
57  
58  
59  
60

- 1  
2  
3 439 12. Lee MJ, Lee C, Chung CS. The Migraine-Stroke Connection. *J Stroke* 2016;18(2):146-  
4  
5 440 56. doi: 10.5853/jos.2015.01683  
6  
7  
8 441 13. Eikermann-Haerter K, Lee JH, Yuzawa I, et al. Migraine mutations increase stroke  
9  
10 442 vulnerability by facilitating ischemic depolarizations. *Circulation* 2012;125(2):335-  
11  
12 443 45. doi: 10.1161/CIRCULATIONAHA.111.045096  
13  
14  
15 444 14. Timm FP, Houle TT, Grabitz SD, et al. Migraine and risk of perioperative ischemic  
16  
17 445 stroke and hospital readmission: hospital based registry study. *BMJ* 2017;356:i6635.  
18  
19 446 doi: 10.1136/bmj.i6635  
20  
21  
22 447 15. Kurth T, Schurks M, Logroscino G, et al. Migraine, vascular risk, and cardiovascular  
23  
24 448 events in women: prospective cohort study. *BMJ* 2008;337:a636. doi:  
25  
26 449 10.1136/bmj.a636  
27  
28  
29 450 16. Kurth T, Gaziano JM, Cook NR, et al. Migraine and risk of cardiovascular disease in  
30  
31 451 women. *JAMA* 2006;296(3):283-91. doi: 10.1001/jama.296.3.283  
32  
33  
34 452 17. Monteith TS, Gardener H, Rundek T, et al. Migraine and risk of stroke in older adults:  
35  
36 453 Northern Manhattan Study. *Neurology* 2015;85(8):715-21. doi:  
37  
38 454 10.1212/WNL.0000000000001854  
39  
40  
41 455 18. Spector JT, Kahn SR, Jones MR, et al. Migraine headache and ischemic stroke risk: an  
42  
43 456 updated meta-analysis. *Am J Med* 2010;123(7):612-24. doi:  
44  
45 457 10.1016/j.amjmed.2009.12.021  
46  
47  
48 458 19. Kuo CY, Yen MF, Chen LS, et al. Increased risk of hemorrhagic stroke in patients with  
49  
50 459 migraine: a population-based cohort study. *PLoS One* 2013;8(1):e55253. doi:  
51  
52 460 10.1371/journal.pone.0055253  
53  
54  
55 461 20. Sacco S, Ornello R, Ripa P, et al. Migraine and hemorrhagic stroke: a meta-analysis.  
56  
57 462 *Stroke* 2013;44(11):3032-8. doi: 10.1161/STROKEAHA.113.002465  
58  
59  
60

- 1  
2  
3 463 21. Lee J, Lee JS, Park SH, et al. Cohort Profile: The National Health Insurance Service-  
4  
5 464 National Sample Cohort (NHIS-NSC), South Korea. *International journal of*  
6  
7 465 *epidemiology* 2016 doi: 10.1093/ije/dyv319  
8  
9  
10 466 22. <http://nhiss.nhis.or.kr/>.  
11  
12 467 23. Kim RB, Kim BG, Kim YM, et al. Trends in the incidence of hospitalized acute  
13  
14 468 myocardial infarction and stroke in Korea, 2006-2010. *J Korean Med Sci*  
15  
16 469 2013;28(1):16-24. doi: 10.3346/jkms.2013.28.1.16  
17  
18  
19 470 24. Adelborg K, Szepligeti SK, Holland-Bill L, et al. Migraine and risk of cardiovascular  
20  
21 471 diseases: Danish population based matched cohort study. *BMJ* 2018;360:k96. doi:  
22  
23 472 10.1136/bmj.k96  
24  
25  
26 473 25. Mahmoud AN, Mentias A, Elgendy AY, et al. Migraine and the risk of cardiovascular  
27  
28 474 and cerebrovascular events: a meta-analysis of 16 cohort studies including 1 152 407  
29  
30 475 subjects. *BMJ Open* 2018;8(3):e020498. doi: 10.1136/bmjopen-2017-020498  
31  
32  
33 476 26. Tietjen G. Migraine as a systemic vasculopathy. *Cephalalgia* 2009;29(9):987-96.  
34  
35  
36 477 27. Graif Y, Shohat T, Machluf Y, et al. Association between asthma and migraine: A  
37  
38 478 cross-sectional study of over 110 000 adolescents. *The clinical respiratory journal*  
39  
40 479 2018;12(10):2491-96.  
41  
42  
43 480 28. Papagianni M, Tziomalos K. Non-alcoholic fatty liver disease: an emerging predictor of  
44  
45 481 stroke risk, severity and outcome. *Eur J Neurol* 2018;25(4):610-11. doi:  
46  
47 482 10.1111/ene.13584  
48  
49 483 29. Zhang Y, Parikh A, Qian S. Migraine and stroke. *Stroke Vasc Neurol* 2017;2(3):160-67.  
50  
51 484 doi: 10.1136/svn-2017-000077  
52  
53  
54 485 30. Vuralli D, Ayata C, Bolay H. Cognitive dysfunction and migraine. *J Headache Pain*  
55  
56 486 2018;19(1):109. doi: 10.1186/s10194-018-0933-4  
57  
58  
59  
60

- 1  
2  
3 487 31. Tietjen EG. Migraine and ischaemic heart disease and stroke: potential mechanisms and  
4  
5 488 treatment implications. *Cephalalgia* 2007;27(8):981-7. doi: 10.1111/j.1468-  
6  
7 489 2982.2007.01407.x  
8  
9  
10 490 32. Dreier JP, Major S, Manning A, et al. Cortical spreading ischaemia is a novel process  
11  
12 491 involved in ischaemic damage in patients with aneurysmal subarachnoid  
13  
14 492 haemorrhage. *Brain* 2009;132(Pt 7):1866-81. doi: 10.1093/brain/awp102  
15  
16  
17 493 33. Liman TG, Bachelier-Walenta K, Neeb L, et al. Circulating endothelial microparticles in  
18  
19 494 female migraineurs with aura. *Cephalalgia* 2015;35(2):88-94.  
20  
21  
22 495 34. Rajendran P, Rengarajan T, Thangavel J, et al. The vascular endothelium and human  
23  
24 496 diseases. *International journal of biological sciences* 2013;9(10):1057.  
25  
26  
27 497 35. Pezzini A, Grassi M, Lodigiani C, et al. Predictors of migraine subtypes in young adults  
28  
29 498 with ischemic stroke: the italian project on stroke in young adults. *Stroke*  
30  
31 499 2011;42(1):17-21. doi: 10.1161/STROKEAHA.110.592246  
32  
33 500 36. De Giuli V, Grassi M, Lodigiani C, et al. Association between migraine and cervical  
34  
35 501 artery dissection: the Italian project on stroke in young adults. *JAMA neurology*  
36  
37 502 2017;74(5):512-18.  
38  
39  
40 503 37. Malik R, Freilinger T, Winsvold BS, et al. Shared genetic basis for migraine and ischemic  
41  
42 504 stroke: A genome-wide analysis of common variants. *Neurology* 2015;84(21):2132-  
43  
44 505 45. doi: 10.1212/WNL.0000000000001606  
45  
46  
47 506 38. Gaist D, Gonzalez-Perez A, Ashina M, et al. Migraine and risk of hemorrhagic stroke: a  
48  
49 507 study based on data from general practice. *J Headache Pain* 2014;15:74. doi:  
50  
51 508 10.1186/1129-2377-15-74  
52  
53  
54  
55  
56  
57  
58  
59  
60

- 1  
2  
3 509 39. Vlak MH, Rinkel GJ, Greebe P, et al. Risk of rupture of an intracranial aneurysm based  
4  
5 510 on patient characteristics: a case-control study. *Stroke* 2013;44(5):1256-9. doi:  
6  
7 511 10.1161/STROKEAHA.111.000679  
8  
9  
10 512 40. Sacco S, Merki-Feld GS, KL AE, et al. Hormonal contraceptives and risk of ischemic  
11  
12 513 stroke in women with migraine: a consensus statement from the European Headache  
13  
14 514 Federation (EHF) and the European Society of Contraception and Reproductive  
15  
16 515 Health (ESC). *J Headache Pain* 2017;18(1):108. doi: 10.1186/s10194-017-0815-1  
17  
18  
19 516 41. Tsai CF, Anderson N, Thomas B, et al. Comparing Risk Factor Profiles between  
20  
21 517 Intracerebral Hemorrhage and Ischemic Stroke in Chinese and White Populations:  
22  
23 518 Systematic Review and Meta-Analysis. *PLoS One* 2016;11(3):e0151743. doi:  
24  
25 519 10.1371/journal.pone.0151743  
26  
27  
28 520 42. Choi HG, Park B, Sim S, et al. Tonsillectomy Does Not Reduce Upper Respiratory  
29  
30 521 Infections: A National Cohort Study. *PLoS One* 2016;11(12):e0169264. doi:  
31  
32 522 10.1371/journal.pone.0169264  
33  
34  
35 523 43. Kim SY, Kim HJ, Park EK, et al. Severe hearing impairment and risk of depression: A  
36  
37 524 national cohort study. *PLoS One* 2017;12(6):e0179973. doi:  
38  
39 525 10.1371/journal.pone.0179973  
40  
41  
42 526 44. Kim MS, Kim SY, Kim JH, et al. Depression in breast cancer patients who have  
43  
44 527 undergone mastectomy: A national cohort study. *PLoS One* 2017;12(4):e0175395.  
45  
46 528 doi: 10.1371/journal.pone.0175395  
47  
48  
49 529 45. Petty GW, Brown RD, Jr., Whisnant JP, et al. Ischemic stroke subtypes : a population-  
50  
51 530 based study of functional outcome, survival, and recurrence. *Stroke* 2000;31(5):1062-  
52  
53 531 8.  
54  
55  
56  
57  
58  
59  
60

- 1  
2  
3 532 46. Bousser M-G, Welch KMA. Relation between migraine and stroke. *The Lancet*  
4  
5 533 *Neurology* 2005;4(9):533-42.  
6  
7 534 47. Roh J, Kim J, Ahn Y. Epidemiological and clinical characteristics of migraine in Korea.  
8  
9 535 *Journal of the Korean Neurological Association* 1997;15(1):1-18.  
10  
11  
12  
13

536

**537 Figure Legend**

17 538 **Fig. 1** A schematic illustrating the participant selection process used in the present study. Of  
18  
19 539 a total of 1,125,691 participants, 41,585 participants with migraine were matched with  
20  
21 540 166,340 control participants for age, group, sex, income level, region of residence, and past  
22  
23  
24 541 medical histories.  
25  
26  
27  
28  
29  
30  
31  
32  
33  
34  
35  
36  
37  
38  
39  
40  
41  
42  
43  
44  
45  
46  
47  
48  
49  
50  
51  
52  
53  
54  
55  
56  
57  
58  
59  
60

1  
2  
3  
4  
5  
6  
7  
8  
9  
10  
11  
12  
13  
14  
15  
16  
17  
18  
19  
20  
21  
22  
23  
24  
25  
26  
27  
28  
29  
30  
31  
32  
33  
34  
35  
36  
37  
38  
39  
40  
41  
42  
43  
44  
45  
46  
47  
48  
49  
50  
51  
52  
53  
54  
55  
56  
57  
58  
59  
60

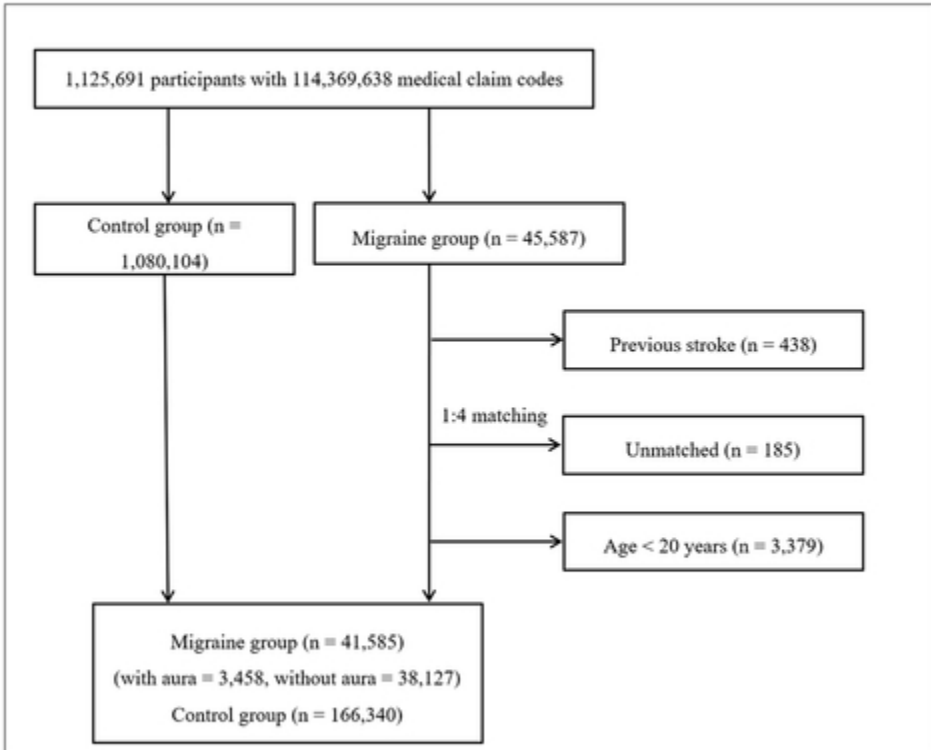

Figure 1

42x42mm (300 x 300 DPI)

## S1. Subgroup analysis of migraine prevalence and stroke occurrence

| Characteristics    | Young men (20-39 years old, n = 15,550)       |                              |         | Young women (20-39 years old, n = 47,410)       |                              |          |
|--------------------|-----------------------------------------------|------------------------------|---------|-------------------------------------------------|------------------------------|----------|
|                    | Migraine<br>(n = 3,110, %)                    | Non-Migraine<br>(n = 12,440) | P-value | Migraine<br>(n = 9,482)                         | Non-Migraine<br>(n = 37,928) | P-value  |
| Ischemic stroke    |                                               |                              | 0.015*  |                                                 |                              | < 0.001* |
| Yes                | 15 (0.48)                                     | 28 (0.22)                    |         | 26 (0.27)                                       | 41 (0.11)                    |          |
| No                 | 3,095 (99.52)                                 | 12,412 (99.78)               |         | 9,456 (99.73)                                   | 37,887 (99.89)               |          |
| Hemorrhagic stroke |                                               |                              | 0.157   |                                                 |                              | 0.727    |
| Yes                | 14 (0.45)                                     | 36 (0.28)                    |         | 16 (0.17)                                       | 58 (0.15)                    |          |
| No                 | 3,096 (99.55)                                 | 12,404 (99.72)               |         | 9,466 (99.73)                                   | 37,870 (99.85)               |          |
| Characteristics    | Middle-aged men (40-59 years old, n = 22,090) |                              |         | Middle-aged women (40-59 years old, n = 68,240) |                              |          |
|                    | Migraine<br>(n = 4,418)                       | Non-Migraine<br>(n = 17,672) | P-value | Migraine<br>(n = 9,482)                         | Non-Migraine<br>(n = 37,928) | P-value  |
| Ischemic stroke    |                                               |                              | 0.560   |                                                 |                              | 0.002*   |
| Yes                | 68 (1.54)                                     | 294 (1.66)                   |         | 138 (1.46)                                      | 409 (1.08)                   |          |
| No                 | 4,350 (98.46)                                 | 17,378 (98.34)               |         | 13,648 (98.54)                                  | 54,952 (98.92)               |          |



1  
2  
3  
4  
5  
6  
7  
8  
9  
10  
11  
12  
13  
14  
15  
16  
17  
18  
19  
20  
21  
22  
23  
24  
25  
26  
27  
28  
29  
30  
31  
32  
33  
34  
35  
36  
37  
38  
39  
40  
41  
42  
43  
44  
45  
46

|                    |                                             |                |         |                                               |                |         |
|--------------------|---------------------------------------------|----------------|---------|-----------------------------------------------|----------------|---------|
| Hemorrhagic stroke |                                             | 0.157          |         |                                               | 0.727          |         |
| Yes                | 34 (0.77)                                   | 127 (0.72)     |         | 78 (0.82)                                     | 291 (0.77)     |         |
| No                 | 4,384 (99.23)                               | 17,545 (99.28) |         | 13,570 (99.18)                                | 54,301 (99.23) |         |
| Characteristics    | <b>Old men (≥ 60 years old, n = 14,740)</b> |                |         | <b>Old women (≥ 60 years old, n = 39,895)</b> |                |         |
|                    | Migraine                                    | Non-Migraine   | P-value | Migraine                                      | Non-Migraine   | P-value |
|                    | (n = 2,948)                                 | (n = 11,792)   |         | (n = 7,979)                                   | (n = 31,916)   |         |
| Ischemic stroke    |                                             | 0.015*         |         |                                               | 0.002*         |         |
| Yes                | 205 (7.0)                                   | 756 (6.4)      |         | 512 (6.4)                                     | 1,766 (5.5)    |         |
| No                 | 2,743 (93.0)                                | 11,036 (93.6)  |         | 7,467 (93.6)                                  | 30,150 (94.5)  |         |
| Hemorrhagic stroke |                                             | 0.157          |         |                                               | 0.465          |         |
| Yes                | 50 (1.7)                                    | 155 (1.3)      |         | 103 (1.3)                                     | 446 (1.4)      |         |
| No                 | 2,898 (98.3)                                | 11,637 (98.7)  |         | 7,876 (98.7)                                  | 31,470 (98.6)  |         |

\* Chi-square test; differences were considered significant at P < 0.05.

# Reporting checklist for cohort study.

Based on the STROBE cohort guidelines.

## Instructions to authors

Complete this checklist by entering the page numbers from your manuscript where readers will find each of the items listed below.

Your article may not currently address all the items on the checklist. Please modify your text to include the missing information. If you are certain that an item does not apply, please write "n/a" and provide a short explanation.

Upload your completed checklist as an extra file when you submit to a journal.

In your methods section, say that you used the STROBE cohort reporting guidelines, and cite them as:

von Elm E, Altman DG, Egger M, Pocock SJ, Gøtzsche PC, Vandenbroucke JP. The Strengthening the Reporting of Observational Studies in Epidemiology (STROBE) Statement: guidelines for reporting observational studies.

|          |                     |                                                                                                 | Page   |
|----------|---------------------|-------------------------------------------------------------------------------------------------|--------|
|          |                     | Reporting Item                                                                                  | Number |
| Title    | <a href="#">#1a</a> | Indicate the study's design with a commonly used term in the title or the abstract              | 1      |
| Abstract | <a href="#">#1b</a> | Provide in the abstract an informative and balanced summary of what was done and what was found | 2      |

|    |                      |                     |                                                                 |     |
|----|----------------------|---------------------|-----------------------------------------------------------------|-----|
| 1  | Background /         | <a href="#">#2</a>  | Explain the scientific background and rationale for the         | 4-5 |
| 2  |                      |                     |                                                                 |     |
| 3  | rationale            |                     | investigation being reported                                    |     |
| 4  |                      |                     |                                                                 |     |
| 5  |                      |                     |                                                                 |     |
| 6  | Objectives           | <a href="#">#3</a>  | State specific objectives, including any prespecified           | 5   |
| 7  |                      |                     |                                                                 |     |
| 8  |                      |                     | hypotheses                                                      |     |
| 9  |                      |                     |                                                                 |     |
| 10 |                      |                     |                                                                 |     |
| 11 | Study design         | <a href="#">#4</a>  | Present key elements of study design early in the paper         | 5   |
| 12 |                      |                     |                                                                 |     |
| 13 |                      |                     |                                                                 |     |
| 14 |                      |                     |                                                                 |     |
| 15 | Setting              | <a href="#">#5</a>  | Describe the setting, locations, and relevant dates, including  | 5-6 |
| 16 |                      |                     |                                                                 |     |
| 17 |                      |                     | periods of recruitment, exposure, follow-up, and data           |     |
| 18 |                      |                     |                                                                 |     |
| 19 |                      |                     | collection                                                      |     |
| 20 |                      |                     |                                                                 |     |
| 21 |                      |                     |                                                                 |     |
| 22 | Eligibility criteria | <a href="#">#6a</a> | Give the eligibility criteria, and the sources and methods of   | 6-7 |
| 23 |                      |                     |                                                                 |     |
| 24 |                      |                     | selection of participants. Describe methods of follow-up.       |     |
| 25 |                      |                     |                                                                 |     |
| 26 |                      |                     |                                                                 |     |
| 27 |                      |                     |                                                                 |     |
| 28 |                      | <a href="#">#6b</a> | For matched studies, give matching criteria and number of       | 6-7 |
| 29 |                      |                     |                                                                 |     |
| 30 |                      |                     | exposed and unexposed                                           |     |
| 31 |                      |                     |                                                                 |     |
| 32 |                      |                     |                                                                 |     |
| 33 | Variables            | <a href="#">#7</a>  | Clearly define all outcomes, exposures, predictors, potential   | 7-8 |
| 34 |                      |                     |                                                                 |     |
| 35 |                      |                     | confounders, and effect modifiers. Give diagnostic criteria, if |     |
| 36 |                      |                     |                                                                 |     |
| 37 |                      |                     | applicable                                                      |     |
| 38 |                      |                     |                                                                 |     |
| 39 |                      |                     |                                                                 |     |
| 40 |                      |                     |                                                                 |     |
| 41 | Data sources /       | <a href="#">#8</a>  | For each variable of interest give sources of data and details  | 5-8 |
| 42 |                      |                     |                                                                 |     |
| 43 | measurement          |                     | of methods of assessment (measurement). Describe                |     |
| 44 |                      |                     |                                                                 |     |
| 45 |                      |                     | comparability of assessment methods if there is more than       |     |
| 46 |                      |                     |                                                                 |     |
| 47 |                      |                     | one group. Give information separately for for exposed and      |     |
| 48 |                      |                     |                                                                 |     |
| 49 |                      |                     | unexposed groups if applicable.                                 |     |
| 50 |                      |                     |                                                                 |     |
| 51 |                      |                     |                                                                 |     |
| 52 |                      |                     |                                                                 |     |
| 53 | Bias                 | <a href="#">#9</a>  | Describe any efforts to address potential sources of bias       | 5-8 |
| 54 |                      |                     |                                                                 |     |
| 55 |                      |                     |                                                                 |     |
| 56 | Study size           | <a href="#">#10</a> | Explain how the study size was arrived at                       | 7   |
| 57 |                      |                     |                                                                 |     |
| 58 |                      |                     |                                                                 |     |
| 59 |                      |                     |                                                                 |     |
| 60 |                      |                     |                                                                 |     |

|    |                        |                      |                                                                                                                                                                                                                                                                            |      |  |
|----|------------------------|----------------------|----------------------------------------------------------------------------------------------------------------------------------------------------------------------------------------------------------------------------------------------------------------------------|------|--|
| 1  | Quantitative variables | <a href="#">#11</a>  | Explain how quantitative variables were handled in the analyses. If applicable, describe which groupings were chosen, and why                                                                                                                                              | 7    |  |
| 2  |                        |                      |                                                                                                                                                                                                                                                                            |      |  |
| 3  |                        |                      |                                                                                                                                                                                                                                                                            |      |  |
| 4  |                        |                      |                                                                                                                                                                                                                                                                            |      |  |
| 5  |                        |                      |                                                                                                                                                                                                                                                                            |      |  |
| 6  |                        |                      |                                                                                                                                                                                                                                                                            |      |  |
| 7  |                        |                      |                                                                                                                                                                                                                                                                            |      |  |
| 8  | Statistical methods    | <a href="#">#12a</a> | Describe all statistical methods, including those used to control for confounding                                                                                                                                                                                          | 8    |  |
| 9  |                        |                      |                                                                                                                                                                                                                                                                            |      |  |
| 10 |                        |                      |                                                                                                                                                                                                                                                                            |      |  |
| 11 |                        |                      |                                                                                                                                                                                                                                                                            |      |  |
| 12 |                        |                      |                                                                                                                                                                                                                                                                            |      |  |
| 13 |                        |                      |                                                                                                                                                                                                                                                                            |      |  |
| 14 |                        | <a href="#">#12b</a> | Describe any methods used to examine subgroups and interactions                                                                                                                                                                                                            | 8    |  |
| 15 |                        |                      |                                                                                                                                                                                                                                                                            |      |  |
| 16 |                        |                      |                                                                                                                                                                                                                                                                            |      |  |
| 17 |                        |                      |                                                                                                                                                                                                                                                                            |      |  |
| 18 |                        |                      |                                                                                                                                                                                                                                                                            |      |  |
| 19 |                        | <a href="#">#12c</a> | Explain how missing data were addressed                                                                                                                                                                                                                                    | NA   |  |
| 20 |                        |                      |                                                                                                                                                                                                                                                                            |      |  |
| 21 |                        |                      |                                                                                                                                                                                                                                                                            |      |  |
| 22 |                        |                      |                                                                                                                                                                                                                                                                            |      |  |
| 23 |                        | <a href="#">#12d</a> | If applicable, explain how loss to follow-up was addressed                                                                                                                                                                                                                 | NA   |  |
| 24 |                        |                      |                                                                                                                                                                                                                                                                            |      |  |
| 25 |                        |                      |                                                                                                                                                                                                                                                                            |      |  |
| 26 |                        | <a href="#">#12e</a> | Describe any sensitivity analyses                                                                                                                                                                                                                                          | NA   |  |
| 27 |                        |                      |                                                                                                                                                                                                                                                                            |      |  |
| 28 |                        |                      |                                                                                                                                                                                                                                                                            |      |  |
| 29 | Participants           | <a href="#">#13a</a> | Report numbers of individuals at each stage of study—eg numbers potentially eligible, examined for eligibility, confirmed eligible, included in the study, completing follow-up, and analysed. Give information separately for exposed and unexposed groups if applicable. | NA   |  |
| 30 |                        |                      |                                                                                                                                                                                                                                                                            |      |  |
| 31 |                        |                      |                                                                                                                                                                                                                                                                            |      |  |
| 32 |                        |                      |                                                                                                                                                                                                                                                                            |      |  |
| 33 |                        |                      |                                                                                                                                                                                                                                                                            |      |  |
| 34 |                        |                      |                                                                                                                                                                                                                                                                            |      |  |
| 35 |                        |                      |                                                                                                                                                                                                                                                                            |      |  |
| 36 |                        |                      |                                                                                                                                                                                                                                                                            |      |  |
| 37 |                        |                      |                                                                                                                                                                                                                                                                            |      |  |
| 38 |                        |                      |                                                                                                                                                                                                                                                                            |      |  |
| 39 |                        |                      |                                                                                                                                                                                                                                                                            |      |  |
| 40 |                        |                      |                                                                                                                                                                                                                                                                            |      |  |
| 41 |                        | <a href="#">#13b</a> | Give reasons for non-participation at each stage                                                                                                                                                                                                                           | NA   |  |
| 42 |                        |                      |                                                                                                                                                                                                                                                                            |      |  |
| 43 |                        |                      |                                                                                                                                                                                                                                                                            |      |  |
| 44 |                        | <a href="#">#13c</a> | Consider use of a flow diagram                                                                                                                                                                                                                                             | 7    |  |
| 45 |                        |                      |                                                                                                                                                                                                                                                                            |      |  |
| 46 |                        |                      |                                                                                                                                                                                                                                                                            |      |  |
| 47 | Descriptive data       | <a href="#">#14a</a> | Give characteristics of study participants (eg demographic, clinical, social) and information on exposures and potential confounders. Give information separately for exposed and unexposed groups if applicable.                                                          | 8-13 |  |
| 48 |                        |                      |                                                                                                                                                                                                                                                                            |      |  |
| 49 |                        |                      |                                                                                                                                                                                                                                                                            |      |  |
| 50 |                        |                      |                                                                                                                                                                                                                                                                            |      |  |
| 51 |                        |                      |                                                                                                                                                                                                                                                                            |      |  |
| 52 |                        |                      |                                                                                                                                                                                                                                                                            |      |  |
| 53 |                        |                      |                                                                                                                                                                                                                                                                            |      |  |
| 54 |                        |                      |                                                                                                                                                                                                                                                                            |      |  |
| 55 |                        |                      |                                                                                                                                                                                                                                                                            |      |  |
| 56 |                        |                      |                                                                                                                                                                                                                                                                            |      |  |
| 57 |                        |                      |                                                                                                                                                                                                                                                                            |      |  |
| 58 |                        |                      |                                                                                                                                                                                                                                                                            |      |  |
| 59 |                        |                      |                                                                                                                                                                                                                                                                            |      |  |
| 60 |                        |                      |                                                                                                                                                                                                                                                                            |      |  |

|    |                |                      |                                                                   |       |
|----|----------------|----------------------|-------------------------------------------------------------------|-------|
| 1  |                | <a href="#">#14b</a> | Indicate number of participants with missing data for each        | 8-13  |
| 2  |                |                      |                                                                   |       |
| 3  |                |                      | variable of interest                                              |       |
| 4  |                |                      |                                                                   |       |
| 5  |                |                      |                                                                   |       |
| 6  |                | <a href="#">#14c</a> | Summarise follow-up time (eg, average and total amount)           | 8     |
| 7  |                |                      |                                                                   |       |
| 8  |                |                      |                                                                   |       |
| 9  |                |                      |                                                                   |       |
| 10 | Outcome data   | <a href="#">#15</a>  | Report numbers of outcome events or summary measures              | NA    |
| 11 |                |                      |                                                                   |       |
| 12 |                |                      | over time. Give information separately for exposed and            |       |
| 13 |                |                      |                                                                   |       |
| 14 |                |                      | unexposed groups if applicable.                                   |       |
| 15 |                |                      |                                                                   |       |
| 16 |                |                      |                                                                   |       |
| 17 | Main results   | <a href="#">#16a</a> | Give unadjusted estimates and, if applicable, confounder-         | 8-13  |
| 18 |                |                      |                                                                   |       |
| 19 |                |                      | adjusted estimates and their precision (eg, 95% confidence        |       |
| 20 |                |                      |                                                                   |       |
| 21 |                |                      | interval). Make clear which confounders were adjusted for         |       |
| 22 |                |                      |                                                                   |       |
| 23 |                |                      | and why they were included                                        |       |
| 24 |                |                      |                                                                   |       |
| 25 |                |                      |                                                                   |       |
| 26 |                |                      |                                                                   |       |
| 27 |                | <a href="#">#16b</a> | Report category boundaries when continuous variables were         | NA    |
| 28 |                |                      |                                                                   |       |
| 29 |                |                      | categorized                                                       |       |
| 30 |                |                      |                                                                   |       |
| 31 |                |                      |                                                                   |       |
| 32 |                |                      |                                                                   |       |
| 33 |                | <a href="#">#16c</a> | If relevant, consider translating estimates of relative risk into | NA    |
| 34 |                |                      |                                                                   |       |
| 35 |                |                      | absolute risk for a meaningful time period                        |       |
| 36 |                |                      |                                                                   |       |
| 37 |                |                      |                                                                   |       |
| 38 | Other analyses | <a href="#">#17</a>  | Report other analyses done—e.g., analyses of subgroups            | 13-14 |
| 39 |                |                      |                                                                   |       |
| 40 |                |                      | and interactions, and sensitivity analyses                        |       |
| 41 |                |                      |                                                                   |       |
| 42 |                |                      |                                                                   |       |
| 43 | Key results    | <a href="#">#18</a>  | Summarise key results with reference to study objectives          | 16    |
| 44 |                |                      |                                                                   |       |
| 45 |                |                      |                                                                   |       |
| 46 | Limitations    | <a href="#">#19</a>  | Discuss limitations of the study, taking into account sources     |       |
| 47 |                |                      |                                                                   |       |
| 48 |                |                      | of potential bias or imprecision. Discuss both direction and      |       |
| 49 |                |                      |                                                                   |       |
| 50 |                |                      | magnitude of any potential bias.                                  |       |
| 51 |                |                      |                                                                   |       |
| 52 |                |                      |                                                                   |       |
| 53 |                |                      |                                                                   |       |
| 54 |                |                      |                                                                   |       |
| 55 |                |                      |                                                                   |       |
| 56 |                |                      |                                                                   |       |
| 57 |                |                      |                                                                   |       |
| 58 |                |                      |                                                                   |       |
| 59 |                |                      |                                                                   |       |
| 60 |                |                      |                                                                   |       |

|    |                  |                     |                                                                |       |
|----|------------------|---------------------|----------------------------------------------------------------|-------|
| 1  | Interpretation   | <a href="#">#20</a> | Give a cautious overall interpretation considering objectives, | 19    |
| 2  |                  |                     | limitations, multiplicity of analyses, results from similar    |       |
| 3  |                  |                     | studies, and other relevant evidence.                          |       |
| 4  |                  |                     |                                                                |       |
| 5  |                  |                     |                                                                |       |
| 6  |                  |                     |                                                                |       |
| 7  |                  |                     |                                                                |       |
| 8  | Generalisability | <a href="#">#21</a> | Discuss the generalisability (external validity) of the study  | 16-18 |
| 9  |                  |                     | results                                                        |       |
| 10 |                  |                     |                                                                |       |
| 11 |                  |                     |                                                                |       |
| 12 |                  |                     |                                                                |       |
| 13 |                  |                     |                                                                |       |
| 14 | Funding          | <a href="#">#22</a> | Give the source of funding and the role of the funders for the | 20    |
| 15 |                  |                     | present study and, if applicable, for the original study on    |       |
| 16 |                  |                     | which the present article is based                             |       |
| 17 |                  |                     |                                                                |       |
| 18 |                  |                     |                                                                |       |
| 19 |                  |                     |                                                                |       |
| 20 |                  |                     |                                                                |       |
| 21 |                  |                     |                                                                |       |

22 The STROBE checklist is distributed under the terms of the Creative Commons Attribution License  
23 CC-BY. This checklist can be completed online using <https://www.goodreports.org/>, a tool made by  
24 the [EQUATOR Network](#) in collaboration with [Penelope.ai](#)  
25  
26  
27  
28  
29  
30  
31  
32  
33  
34  
35  
36  
37  
38  
39  
40  
41  
42  
43  
44  
45  
46  
47  
48  
49  
50  
51  
52  
53  
54  
55  
56  
57  
58  
59  
60
