# Supplementary material for: Risk of ischaemic stroke in patients with migraine: a longitudinal follow-up study using a national sample cohort in South Korea
Source: PubMed Central journal article supplement — BMJ Open. 2019 Apr 2;9(4):e027701. doi: 10.1136/bmjopen-2018-027701 (PMC6500292; doi:10.1136/bmjopen-2018-027701), 2019-04-02
Supplement: bmjopen-2018-027701supp001.pdf [file bmjopen-2018-027701supp001.pdf]

**S1. Subgroup analysis of migraine prevalence and stroke occurrence**

| Characteristics    | Young men (20-39 years old, n = 15,550)       |                              |         | Young women (20-39 years old, n = 47,410)       |                              |          |
|--------------------|-----------------------------------------------|------------------------------|---------|-------------------------------------------------|------------------------------|----------|
|                    | Migraine<br>(n = 3,110, %)                    | Non-Migraine<br>(n = 12,440) | P-value | Migraine<br>(n = 9,482)                         | Non-Migraine<br>(n = 37,928) | P-value  |
| Ischemic stroke    |                                               |                              | 0.015*  |                                                 |                              | < 0.001* |
| Yes                | 15 (0.48)                                     | 28 (0.22)                    |         | 26 (0.27)                                       | 41 (0.11)                    |          |
| No                 | 3,095 (99.52)                                 | 12,412 (99.78)               |         | 9,456 (99.73)                                   | 37,887 (99.89)               |          |
| Hemorrhagic stroke |                                               |                              | 0.157   |                                                 |                              | 0.727    |
| Yes                | 14 (0.45)                                     | 36 (0.28)                    |         | 16 (0.17)                                       | 58 (0.15)                    |          |
| No                 | 3,096 (99.55)                                 | 12,404 (99.72)               |         | 9,466 (99.73)                                   | 37,870 (99.85)               |          |
| Characteristics    | Middle-aged men (40-59 years old, n = 22,090) |                              |         | Middle-aged women (40-59 years old, n = 68,240) |                              |          |
|                    | Migraine<br>(n = 4,418)                       | Non-Migraine<br>(n = 17,672) | P-value | Migraine<br>(n = 9,482)                         | Non-Migraine<br>(n = 37,928) | P-value  |
| Ischemic stroke    |                                               |                              | 0.560   |                                                 |                              | 0.002*   |
| Yes                | 68 (1.54)                                     | 294 (1.66)                   |         | 138 (1.46)                                      | 409 (1.08)                   |          |
| No                 | 4,350 (98.46)                                 | 17,378 (98.34)               |         | 13,648 (98.54)                                  | 54,952 (98.92)               |          |

|                    |                                             |                |         |                                               |                |         |
|--------------------|---------------------------------------------|----------------|---------|-----------------------------------------------|----------------|---------|
| Hemorrhagic stroke |                                             | 0.157          |         | 0.727                                         |                |         |
| Yes                | 34 (0.77)                                   | 127 (0.72)     |         | 78 (0.82)                                     | 291 (0.77)     |         |
| No                 | 4,384 (99.23)                               | 17,545 (99.28) |         | 13,570 (99.18)                                | 54,301 (99.23) |         |
| Characteristics    | <b>Old men (≥ 60 years old, n = 14,740)</b> |                |         | <b>Old women (≥ 60 years old, n = 39,895)</b> |                |         |
|                    | Migraine                                    | Non-Migraine   | P-value | Migraine                                      | Non-Migraine   | P-value |
|                    | (n = 2,948)                                 | (n = 11,792)   |         | (n = 7,979)                                   | (n = 31,916)   |         |
| Ischemic stroke    |                                             | 0.015*         |         | 0.002*                                        |                |         |
| Yes                | 205 (7.0)                                   | 756 (6.4)      |         | 512 (6.4)                                     | 1,766 (5.5)    |         |
| No                 | 2,743 (93.0)                                | 11,036 (93.6)  |         | 7,467 (93.6)                                  | 30,150 (94.5)  |         |
| Hemorrhagic stroke |                                             | 0.157          |         | 0.465                                         |                |         |
| Yes                | 50 (1.7)                                    | 155 (1.3)      |         | 103 (1.3)                                     | 446 (1.4)      |         |
| No                 | 2,898 (98.3)                                | 11,637 (98.7)  |         | 7,876 (98.7)                                  | 31,470 (98.6)  |         |

\* Chi-square test; differences were considered significant at  $P < 0.05$ .
